# Supplementary material for: Improved diagnostics of infectious diseases in emergency departments: a protocol of a multifaceted multicentre diagnostic study
Source: PubMed Central journal article supplement — BMJ Open. 2021 Sep 30;11(9):e049606. doi: 10.1136/bmjopen-2021-049606 (PMC8487181; doi:10.1136/bmjopen-2021-049606), 2021-09-30
Supplement: bmjopen-2021-049606.draft_revisions.pdf [file bmjopen-2021-049606.draft_revisions.pdf]

# BMJ Open

BMJ Open is committed to open peer review. As part of this commitment we make the peer review history of every article we publish publicly available.

When an article is published we post the peer reviewers' comments and the authors' responses online. We also post the versions of the paper that were used during peer review. These are the versions that the peer review comments apply to.

The versions of the paper that follow are the versions that were submitted during the peer review process. They are not the versions of record or the final published versions. They should not be cited or distributed as the published version of this manuscript.

BMJ Open is an open access journal and the full, final, typeset and author-corrected version of record of the manuscript is available on our site with no access controls, subscription charges or pay-per-view fees (<http://bmjopen.bmj.com>).

If you have any questions on BMJ Open's open peer review process please email [info.bmjopen@bmj.com](mailto:info.bmjopen@bmj.com)

# BMJ Open

## Improved diagnostics of infectious diseases in Emergency Departments – a protocol of a multifaceted multicenter diagnostic study

|                               |                                                                                                                                                                                                                                                                                                                                                                                                                                                                                                                                                                                                                                                                                                                                                                                                                                                                                                                                                                                                                                                                                                                                                                                                                                                                                                                                                                                                                                                                                                                                                                                                                                                                                                                                                                                                                                                                                                                                                                                                                                                                                                                            |
|-------------------------------|----------------------------------------------------------------------------------------------------------------------------------------------------------------------------------------------------------------------------------------------------------------------------------------------------------------------------------------------------------------------------------------------------------------------------------------------------------------------------------------------------------------------------------------------------------------------------------------------------------------------------------------------------------------------------------------------------------------------------------------------------------------------------------------------------------------------------------------------------------------------------------------------------------------------------------------------------------------------------------------------------------------------------------------------------------------------------------------------------------------------------------------------------------------------------------------------------------------------------------------------------------------------------------------------------------------------------------------------------------------------------------------------------------------------------------------------------------------------------------------------------------------------------------------------------------------------------------------------------------------------------------------------------------------------------------------------------------------------------------------------------------------------------------------------------------------------------------------------------------------------------------------------------------------------------------------------------------------------------------------------------------------------------------------------------------------------------------------------------------------------------|
| Journal:                      | <i>BMJ Open</i>                                                                                                                                                                                                                                                                                                                                                                                                                                                                                                                                                                                                                                                                                                                                                                                                                                                                                                                                                                                                                                                                                                                                                                                                                                                                                                                                                                                                                                                                                                                                                                                                                                                                                                                                                                                                                                                                                                                                                                                                                                                                                                            |
| Manuscript ID                 | bmjopen-2021-049606                                                                                                                                                                                                                                                                                                                                                                                                                                                                                                                                                                                                                                                                                                                                                                                                                                                                                                                                                                                                                                                                                                                                                                                                                                                                                                                                                                                                                                                                                                                                                                                                                                                                                                                                                                                                                                                                                                                                                                                                                                                                                                        |
| Article Type:                 | Protocol                                                                                                                                                                                                                                                                                                                                                                                                                                                                                                                                                                                                                                                                                                                                                                                                                                                                                                                                                                                                                                                                                                                                                                                                                                                                                                                                                                                                                                                                                                                                                                                                                                                                                                                                                                                                                                                                                                                                                                                                                                                                                                                   |
| Date Submitted by the Author: | 27-Jan-2021                                                                                                                                                                                                                                                                                                                                                                                                                                                                                                                                                                                                                                                                                                                                                                                                                                                                                                                                                                                                                                                                                                                                                                                                                                                                                                                                                                                                                                                                                                                                                                                                                                                                                                                                                                                                                                                                                                                                                                                                                                                                                                                |
| Complete List of Authors:     | <p>Skjøt-Arkil, Helene; Hospital Sønderjylland, The Emergency Department; University of Southern Denmark Faculty of Health Sciences, Department of Regional Health Research</p> <p>Heltborg, Anne; Hospital Sønderjylland, The Emergency Department; University of Southern Denmark Faculty of Health Sciences, Department of Regional Health Research</p> <p>Lorentzen, Morten; Hospital Sønderjylland, The Emergency Department; University of Southern Denmark Faculty of Health Sciences, Department of Regional Health Research</p> <p>Cartuliales, Mariana; Hospital Sønderjylland, The Emergency Department; University of Southern Denmark Faculty of Health Sciences, Department of Regional Health Research</p> <p>Hertz, Mathias Amdi; Odense University Hospital, Department of Infectious Diseases; University of Southern Denmark Faculty of Health Sciences, Department of Clinical Research</p> <p>Graumann, Ole; Odense Universitetshospital, Department of Radiology; Syddansk Universitet Det Sundhedsvidenskabelige Fakultet, Institute for Clinical Research</p> <p>Rosenvinge, Flemming; Odense Universitetshospital, Department of Clinical Microbiology</p> <p>Petersen, Eva; Hospital Sønderjylland, Blood samples, Biochemistry and Immunology</p> <p>Østergaard, Claus; Lillebælt Hospital, Department of Clinical Microbiology</p> <p>Laursen, Christian; Odense University Hospital, Department of Respiratory Medicine; University of Southern Denmark Faculty of Health Sciences, Department of Clinical Research</p> <p>Skovsted, Thor; Hospital Sønderjylland, Blood sample, Biochemistry and Immunology</p> <p>Posth, Stefan; Syddansk Universitet, Klinisk Institut; Odense University Hospital, Emergency Department</p> <p>Chen, Ming; Hospital Sønderjylland, Department of Clinical Microbiology; University of Southern Denmark Faculty of Health Sciences, Department of Regional Health Research</p> <p>Mogensen, Christian; Hospital Sønderjylland, Emergency Department; University of Southern Denmark Faculty of Health Sciences, Department of Regional Health Research</p> |
| Keywords:                     | Diagnostic microbiology < INFECTIOUS DISEASES, MICROBIOLOGY, Computed tomography < RADIOLOGY & IMAGING, Diagnostic radiology                                                                                                                                                                                                                                                                                                                                                                                                                                                                                                                                                                                                                                                                                                                                                                                                                                                                                                                                                                                                                                                                                                                                                                                                                                                                                                                                                                                                                                                                                                                                                                                                                                                                                                                                                                                                                                                                                                                                                                                               |

1  
2  
3  
4  
5  
6  
7  
8  
9  
10  
11  
12  
13  
14  
15  
16  
17  
18  
19  
20  
21  
22  
23  
24  
25  
26  
27  
28  
29  
30  
31  
32  
33  
34  
35  
36  
37  
38  
39  
40  
41  
42  
43  
44  
45  
46  
47  
48  
49  
50  
51  
52  
53  
54  
55  
56  
57  
58  
59  
60

|  |                                                                                        |
|--|----------------------------------------------------------------------------------------|
|  | < RADIOLOGY & IMAGING, Ultrasound < RADIOLOGY & IMAGING, ACCIDENT & EMERGENCY MEDICINE |
|  |                                                                                        |

SCHOLARONE™  
Manuscripts

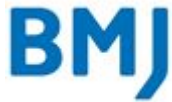

I, the Submitting Author has the right to grant and does grant on behalf of all authors of the Work (as defined in the below author licence), an exclusive licence and/or a non-exclusive licence for contributions from authors who are: i) UK Crown employees; ii) where BMJ has agreed a CC-BY licence shall apply, and/or iii) in accordance with the terms applicable for US Federal Government officers or employees acting as part of their official duties; on a worldwide, perpetual, irrevocable, royalty-free basis to BMJ Publishing Group Ltd ("BMJ") its licensees and where the relevant Journal is co-owned by BMJ to the co-owners of the Journal, to publish the Work in this journal and any other BMJ products and to exploit all rights, as set out in our [licence](#).

The Submitting Author accepts and understands that any supply made under these terms is made by BMJ to the Submitting Author unless you are acting as an employee on behalf of your employer or a postgraduate student of an affiliated institution which is paying any applicable article publishing charge ("APC") for Open Access articles. Where the Submitting Author wishes to make the Work available on an Open Access basis (and intends to pay the relevant APC), the terms of reuse of such Open Access shall be governed by a Creative Commons licence – details of these licences and which [Creative Commons](#) licence will apply to this Work are set out in our licence referred to above.

Other than as permitted in any relevant BMJ Author's Self Archiving Policies, I confirm this Work has not been accepted for publication elsewhere, is not being considered for publication elsewhere and does not duplicate material already published. I confirm all authors consent to publication of this Work and authorise the granting of this licence.



1

# Improved diagnostics of infectious diseases in Emergency Departments

## – a protocol of a multifaceted multicenter diagnostic study

Short title: Improved diagnostics of infectious diseases

Helene Skjøt-Arkil<sup>1,2\*</sup>, Anne Heltborg<sup>3</sup>, Morten Hjarnø Lorentzen<sup>1,2</sup>, Mariana Bichuette Cartuliales<sup>1,2</sup>, Mathias Amdi Hertz<sup>4</sup>, Ole Graumann<sup>5,6</sup>, Flemming Schønning Rosenvinge<sup>7</sup>, Eva Rabing Brix Petersen<sup>8</sup>, Claus Østergaard<sup>9</sup>, Christian B. Laursen<sup>6,10</sup>, Thor Aage Skovsted<sup>8</sup>, Stefan Posth<sup>6,11</sup>, Ming Chen<sup>12</sup>, Christian Backer Mogensen<sup>1,2</sup>

### *Affiliations*

- 1: Emergency Department, Hospital Sønderjylland, Aabenraa, Denmark
- 2: Department of Regional Health Research, University of Southern Denmark, Aabenraa, Denmark
- 3: Medical Department, Hospital Sønderjylland, Sønderborg, Denmark
- 4: Department of Infectious Diseases, Odense University Hospital, Odense, Denmark
- 5: Radiology Department, Odense University Hospital, Odense, Denmark
- 6: Department of Clinical Research, University of Southern Denmark, Odense, Denmark
- 7: Department of Clinical Microbiology, Odense University Hospital, Odense, Denmark
- 8: Bloodsamples, Biochemistry and Immunology, Hospital Sønderjylland, Aabenraa, Denmark
- 9: Department of Clinical Microbiology, Lillebælt Hospital, Vejle, Denmark
- 10: Department of Respiratory Medicine, Odense University Hospital, Odense, Denmark
- 11: Emergency Department, Odense University Hospital, Odense, Denmark
- 12: Department of Microbiology, Hospital Sønderjylland, Sønderborg, Denmark

\*Corresponding author: Emergency Department, Hospital Sønderjylland, Kresten Philipsensvej 15, 6200 Aabenraa, Denmark; Email: Helene.skjoet-arkil@rsyd.dk

Word count: 4.446

2

## Abstract

**Background:** The major obstacle in prescribing an appropriate and targeted antibiotic treatment is insufficient knowledge concerning *whether* the patient has a bacterial infection, *where* the focus of infection is and *which* bacteria are the agents of the infection. A prerequisite for the appropriate use of antibiotics is timely access to accurate diagnostics such as point-of-care (POC) testing.

The study aims to evaluate diagnostic tools and working methods that support a prompt and accurate diagnosis of hospitalized patients suspected of an acute infection. We will focus on the most common acute infections; community-acquired pneumonia (CAP) and acute pyelonephritis (APN). The objectives are to investigate 1) patient characteristics and treatment trajectory of the different acute infections, 2) diagnostic and prognostic accuracy of infection markers, 3) diagnostic accuracy of POC urine flow cytometry on diagnosing and excluding bacteriuria, 4) how effective the addition of POC analysis of sputum to the diagnostic set-up for CAP is on antibiotic prescriptions, 5) diagnostic accuracy of POC ultrasound and ultralow dose (ULD) Computed Tomography (CT) on diagnosing CAP, 6) diagnostic accuracy of specialist ultrasound on diagnosing APN, 7) diagnostic accuracy of POC ultrasound in diagnosing hydronephrosis in patients suspected of APN.

**Methods and analysis:** It is a multifaceted multicenter diagnostic study, including 1000 adults admitted with suspicion of an acute infection. Participants will within the first 24 hours of admission undergo additional diagnostic tests including infection markers, POC urine flow cytometry, POC analysis of sputum, POC and specialist ultrasound, and ultralow dose CT. The primary reference standard is an assigned diagnosis determined by a panel of experts.

**Ethics, dissemination and registration:** Approved by Regional Committees on Health Research Ethics for Southern Denmark, Danish Data Protection Agency, and clinicaltrials.gov. Results will be presented in ten peer-reviewed journals, and positive, negative and inconclusive results will be published.

**Key words:** Acute Infection, antibiotics, diagnostic, pneumonia, pyelonephritis, sputum, point-of-care-test, ultrasound, infection marker, Ultralow dose Computed Tomography

### Strengths and limitations of the study:

- It is a pragmatic study that reflects reality and has potential for substantial clinical significance
- The study combines diagnostics and knowledge from five different medical specialties
- The study is complex and contains a number of sub-studies which share the same population
- COVID-19 and the consequent societal lockdown might affect patient distribution

3

## Introduction

### *Antibiotic resistance*

Multi-resistant bacteria is one of the major threats to the public health(1). The incidence of multi-resistant bacteria is increasing in Denmark(2) and every 20th patient admitted to a Danish Emergency Department (ED) is colonized with multi-resistant bacteria(3). Denmark has focused on this challenge(4) by screening special patient groups for multi-resistant bacteria(5, 6), and by initiating campaigns to reduce antibiotic consumption - mainly the use of broad-spectrum antibiotics in hospitals(4, 7).

The Danish Ministry of Health has made extensive efforts targeting the use of antibiotics in hospitals. However, the major obstacle in reducing the prescription of broad-spectrum antibiotics is insufficient knowledge concerning *whether* the patient has a bacterial infection, *where* the focus of infection is and *which* bacteria are the agents of the infection(8). Uncertainty in the answers to these three questions often leads a clinician to choose a broad-spectrum antibiotic at the onset of treatment. Unfortunately, the prescription of a broad-spectrum antibiotic is rarely revised when laboratory results are available, often because the patient already has been discharged(9).

### *Acute infections and diagnostic tools*

A prerequisite for appropriate use of antibiotics is timely access to accurate diagnostic tests, since treatment of acute infections should be initiated within a few hours to avoid serious complications such as bacteremia, sepsis, organ failure, septic shock and death(10). The most common conditions among ED patients with suspected infections are community acquired pneumonia (CAP) and acute pyelonephritis (APN)(11, 12). Diagnosing CAP and APN can be challenging as symptoms are often weak and nonspecific and the current methods for focal and etiological diagnosis have low sensitivity and specificity and often deliver results after the decision regarding antibiotic treatment has been made(9, 13, 14).

The Coronavirus Disease 2019 (COVID-19) pandemic has highlighted the need of accurate diagnostic tests. Quick and correct classification of pneumonia as COVID-19, another viral or bacterial pneumonia, or even COVID-19 complicated with bacterial pneumonia, is of vital importance to select the correct treatment (including antibiotics), and the correct infection control measures, including isolation.

In order to make the correct diagnosis and prescribe an appropriate and targeted treatment within a few hours of admission, it is important to the physician to be able to answer the following three questions: a) Is it an infection that requires antibiotic treatment (*infection marker*)? b) Where is the focus of infection (imaging *diagnosis*)? c) Which bacteria should the prescribed antibiotic target (*etiologic diagnosis*)?

### **Bacterial infection markers**

To support the diagnosis of an infection and assess its severity, a measure of the systemic inflammatory response is useful e.g. abnormal temperature, elevated leucocyte count with neutrocytosis, or elevated C-reactive protein (CRP). Some uncertainty is associated with CRP because it has a delayed response to bacterial infection and often is elevated in non-infectious inflammatory conditions(15). A more sensitive and specific marker that can differentiate between bacterial and viral infection and reflect the severity of the infection is desired(16). Serum procalcitonin (PCT) has potential as a diagnostic tool in suspected bacterial infections(17) and can distinguish between viral and bacterial pneumonias(18). Soluble urokinase plasminogen activator receptor (suPAR) might have a potential as a marker for acute bacterial infections requiring antibiotic treatment(19). However, there are no well-conducted studies which compare simultaneously all three biomarkers diagnostic abilities for bacterial infections in general or in relation to CAP or APN (16, 20).

### **Imaging diagnostics**

4

1  
2  
3  
4  
5  
6  
7  
8  
9  
10  
11  
12  
13  
14  
The CAP diagnosis is primarily based on clinical symptoms and findings, supplemented with chest X-ray, which has a low sensitivity and specificity (21). Identifying an improved imaging alternative with high diagnostic sensitivity and specificity and minimal risk to the patient is imperative. Computed Tomography scans (CT), e.g. high-resolution CT (HRCT) provides a detailed diagnosis of thoracic diseases, but the radiation dose is high and potentially harmful. Low-dose CT has shown promising diagnostic results, but the radiation dose is still potentially harmful (22). Ultralow dose CT (ULDCT) of the thorax could be an alternative, but has yet to be studied within an ED context. Another relevant imaging modality is ultrasound scanning (US). US of the lungs is useful to diagnose pulmonary edema and pleural effusion, but the value of US performed by a novice operator when diagnosing CAP in an ED setting needs further investigation(23).

15  
16  
17  
18  
19  
20  
21  
22  
Currently, no imaging methods are used to verify the diagnosis of APN. The diagnosis is primarily based on unspecific clinical findings (24), and is often not confirmed microbiologically (25). Complicating factors such as hydronephrosis and renal abscess can be visualized with conventional US (26). Contrast enhanced US (CEUS) seems to be a promising diagnostic imaging modality of acute renal inflammation (27, 28). The value and suitability in a clinical setting of this more advanced US investigation is unknown.

### 23 24 25 26 27 28 29 30 31 **Etiological diagnostics**

32  
33  
34  
35  
36  
37  
38  
39  
40  
41  
Sputum can be cultivated to determine the agent of CAP. However, results are often unspecific and not available until after discharge of the patient or completion of treatment(9). A point-of-care (POC) tool providing rapid microbiological results on e.g. sputum samples would therefore be useful. Systems are available today based on polymerase chain reaction (PCR) methods with results available within one hour for a variety of viral and bacterial pathogens (29). The impact of such fast diagnostic systems on antibiotic prescriptions has not been investigated in an ED context.

42  
43  
44  
45  
46  
47  
48  
49  
50  
51  
52  
53  
54  
55  
56  
57  
58  
59  
60  
The diagnosis of APN is verified by significant bacteriuria in urine culture (25), but as many as half of the patients with clinical APN fails to meet this diagnostic criterion. Unfortunately, the time from sample to result for urine cultures is more than 24 hours (24, 25, 30, 31). Urine test strips are unreliable with low specificity and low predictive values(32). Therefore, a POC test is desired, which can provide rapid results and quickly identify a bacteriuria. One such tool may be urine flow cytometry (UFC), which has shown promising diagnostic value for the exclusion of bacteriuria with a high negative predictive value (33). However, better documentation for its use as an ED diagnostic screening method is needed.

### 61 62 63 64 65 66 67 68 69 70 **Aim and objectives**

Our broad hypothesis is that improved diagnostic strategies for patients in ED with suspicion of systemic infection can contribute to more rapid and accurate diagnosis. Thereby, we assume that a more appropriate antibiotic treatment can be administered to these patients.

The project aims to evaluate alternative diagnostic tools and working methods that support a prompt and accurate diagnosis of hospitalized patients suspected of an acute infection. We will focus on the most common ED infections; CAP and APN. The research objectives are to answer the following questions:

- 1) What are the patient characteristics and treatment trajectory of the different ED infections?
- 2) What is the diagnostic and prognostic accuracy of the infection markers PCT, suPAR, and CRP in patients with suspected CAP and APN?
- 3) What is the diagnostic accuracy of POC-UFC on diagnosing and excluding bacteraemia?
- 4) How effective is the addition of POC-PCR analysis of sputum to the diagnostic set-up for CAP on antibiotic prescribing?
- 5) What is the diagnostic accuracy of POC-US and ULDCT on diagnosing CAP?
- 6) What is the diagnostic accuracy of CEUS on diagnosing APN?

5

7) What is the diagnostic accuracy of POC-US in diagnosing hydronephrosis in patients suspected of APN?

The ultimate goal is to combine the results of all these seven objectives into a novel diagnostic model which the ED physician can apply when receiving a patient with suspicion of infection.

## Methods

### Study design

The study is designed as a multifaceted multicenter diagnostic study. Participants will undergo additional diagnostic tests depending on the primary suspected focus of infection.

The study protocol is reported in accordance with the SPIRIT (Standard protocol items: Recommendations for interventional trials) statement(34).

### Setting

The study will recruit participants from three Danish EDs: the regional Hospital, Lillebælt Hospital in Kolding, the regional Hospital, Hospital Sønderjylland in Aabenraa, and the University Hospital, Odense University Hospital in Odense. Enrolment commences from February 8<sup>th</sup> 2021 and continues until the predefined sample size has been reached.

Six project assistants will recruit the participants and collect data. The project assistants will have a healthcare education (physicians, physiotherapists and medical students). They are certificated in focused US of kidney and lung (one-day POC-US course, 25 supervised scans, and Objective Structured Assessment of US Skills (OASUS) test) within one month from enrollment.

The study originates from the Emergency Research Unit affiliated at Hospital Sønderjylland and Department of Regional Health Research at University of Southern Denmark.

### Population and eligibility criteria

Inclusion of patients is based on the receiving ED physician's initial clinical assessment of the patient. Adults aged 18 or older admitted to the ED will be invited to participate in the study, if the receiving physician suspects the patient is having an infection. Only patients able to give informed consent will be invited. Depending on primary suspected focus of infection (CAP, APN or other/unknown), the patients will be included into one of three diagnostic tracks (A, B, or C) as shown in Figure 1. In this study we define APN as a urinary tract infection with typical local symptoms and systemic affection (i.e. fever, sepsis), thus indicating ascension of infection above the bladder.

Exclusion criteria that apply to all three tracks:

- If the attending physician considers that participation will delay a life-saving treatment or directly transfer to intensive care unit
- Admission within the last 14 days to avoid hospital acquired infections
- Verified COVID-19 disease within 14 days before admission.
- Pregnant women
- Severe immunodeficiencies:
  - Primary immunodeficiencies
  - Secondary immunodeficiencies
    - Human immunodeficiency virus (HIV) positive cluster of differentiation 4 (CD4) <200
    - Patients receiving immunosuppressive treatment (Anatomical therapeutic chemical (ATC) classification L04A)

6

- Corticosteroid treatment (>20 mg/day prednisone or equivalent for >14 days within the last 30 days)
- Chemotherapy within 30 days

Exclusion criteria that only apply to patients with suspected CAP (track A):

- Patients <40 years old are excluded from the ULDC and HRCT due to risk of cancer from radiation
- Patients <65 years who already participated once will be excluded from ULDC and HRCT due to risk of cancer from radiation

Exclusion criteria that only apply to patients with suspected APN (track B):

- Patients are excluded from magnetic resonance imaging (MRI) according to common MRI exclusion criteria (e.g. contraindicating metal in the body) and claustrophobia
- Patients with known allergy to US contrast

Figure 1 Design of patient flow and diagnostic tracks

## Recruitment

The study assistants will identify potential eligible patients through the local logistic system. According to the local guidelines, a medical clinical assessment of the patients is performed within half an hour from arrival at the ED(35). The study assistant will immediately after the assessment consult the receiving physician to ask if a) a systemic infection is suspected, and b) what the most likely focus is: lungs, urinary tract, elsewhere or unknown. If the patient meets eligibility criteria, the study assistant will present the study both verbally and in writing, and invite the patient to participate in the study.

## Procedure

The study assistant will after obtained written consent order blood samples, urine sample, and the diagnostic tests described in the assigned track. The study assistant will collect data regarding current symptoms and signs, lifestyle factors, disease severity, vital parameters, triage at arrival, comorbidities, functional status, resident status, antibiotics prescribed during the last month, and medical history by looking in the patient record and by patient interview.

## Infection markers

Blood samples will be collected by a medical laboratory technologist and transferred to the local laboratory for analysis of CRP, PCT and suPAR. Laboratory staff will be blinded to participant diagnosis and outcome. CRP and PCT results will be available to the treating physician, but the suPAR result will not be available. CRP will be measured using an immunoturbidimetric assay (Tina-quant®, Roche) on Roche/Hitachi Cobas® systems. Plasma PCT will be quantified by an automated sandwich immunoassay "ECLIA" (Elecsys®, BRAHMS PCT-analyses) on Cobas® within two hours from collection according to standard procedure. Plasma suPAR will be quantified by using the commercial available suPARnostic® Tubilatex assay reagents (ViroGates, Denmark) on Cobas® as previously validated (36). Separated plasma is kept refrigerated and analysed for suPAR within 48 hours after collection.

## POC-UFC

A urine sample will be collected according to routine procedure by the study assistant. The sample will be divided into two aliquots; one half for routine urine culturing, and one half for POC-UFC analysis (UF-5000, Sysmex, Kobe, Japan). The analysis will be performed according to manufacturer's instruction and conducted by laboratory staff.



7

Laboratory staff will be blinded to participant diagnosis and outcome. The results of the POC-UFC analysis will not be visible to the treating physician.

### **POC-PCR sputum analysis**

A sputum sample will be collected according to standard procedure as soon as possible after recruitment by the study assistant. This sample will be randomly assigned to one of two groups with 1:1 allocation: 1) POC-PCR analysis (Biofire® FilmArray® Pneumonia Panel plus, Biomérieux, Marcy l'Etoile, France) in accordance with manufacturer's instruction(37), and 2) Routine microbiology analysis (culturing and PCR). The randomization will be performed by the study assistants and generated electronically using Research Electronic Data Capture (RedCap) Randomization Module (38) with permuting blocks and stratified according to sites. The result of the POC-PCR will be presented by the study assistant to the treating physician within four hours upon admission. The treating physician will along with the result receive a recommended action list, developed by microbiologists.

The patients will be blinded, and the investigator will be blinded to data management and analysis. Outcome adjudicators will not be blinded.

### **POC-US**

A POC-US (Butterfly iQ+, GM Medical) of the lungs will be performed bedside as Focused Lung US (FLUS) by study assistant within 24 hours after admission. FLUS is used to diagnose pneumothorax, pleural effusion and interstitial syndrome. Additionally, signs of pneumonia ie., liver like alveolar consolidation with shredded borders and air bronchograms will be described. Diagnostic criteria used are in accordance with international consensus(39, 40). FLUS will be conducted immediately before or after the CT scans. The FLUS result will be available to the treating physician. If a result requires immediate action, the clinician will be contacted directly by the examiner, according to standard care.

A POC-US (Butterfly iQ+) of the kidneys will be conducted bedside by a study assistant within 24 hours after admission in order to assess whether hydronephrosis is present or absent. If present, the condition will be graded in grades 1, 2, 3 or 4(41). The result will be available to the treating physician. If a result requires immediate action, the clinician will be contacted directly by the examiner, according to standard care.

### **ULDCT and HRCT**

The ULDCT and HRCT of the thorax scans are performed in the same scanning seance, thus on the same scanner. A specially designed technical protocol is the basis of the ULDCT and will prior to inclusion through a minor pilot study be optimized at each site of inclusion to ensure uniform quality and dose. The radiological findings from ULDCT will be reported systematically using standardized assessment templates by radiologists. The HRCT will be performed according to standard protocols at each hospital, but only during inspiration to limit radiation dose. HRCT will be reference standard for FLUS and ULDCT and interpreted by lung expert radiologists. The reports from POC-US, ULDCT, and HRCT respectively will be blinded. Study consultant radiologists with experience from ED patients will post-process report the ULDCT scans systematically using specially developed research report templates. The results of ULDCT and HRCT will be available to the treating physician within a week. If a result requires immediate action, the clinician will be contacted directly by the examiner, according to standard care. If a participant is discharged before the scans have been performed, they will be offered the scan in an outpatient setting.

### **Specialist US and MRI**

A specialist US will be performed at the Radiology Department, including conventional grayscale US and CEUS with intravenous injection of 1.5 mL ultrasound contrast (Sonovue®, Bracco). At the same time, or as close as possible, a MRI without intravenous contrast of the kidneys will be conducted. The MRI will include the following sequences: planning, Dixon, T1 mapping, T2, T2 mapping, Diffusion ADC (100, 400, 800), MRI angio (3D VIBE), and Phase Contrast. The radiological findings will be described systematically using standardized assessment templates. The report from US and MRI respectively will be blinded. A renal expert radiologist will interpret the MRI and will post-process report the imaging systematically using specially developed research report templates. Imaging from the

8

CEUS will be evaluated in an external postprocessing software algorithm (Vuebox, Bracco). The non-experimental results of the scans will be available to the treating physician within a week. If a result requires immediate action, the clinician will be contacted directly by the examiner, according to standard care. If a participant is discharged before the scans have been performed, they will be offered the scans in an outpatient setting.

## Reference standard

Unless otherwise stated, the reference standard is the assigned diagnosis determined by a panel of experts. The panel consists of two consultants from Emergency Departments with considerable experience within emergency medicine. They will determine the final diagnosis based on all relevant information in medical records and study database available from the admission including routine blood analysis, blood/urine/sputum culturing, POC-PCR, routine and study imaging (including HRCT and MRI), and clinical information. A standardized template will be used. Conflicts will be discussed until consensus is reached.

## Data collection and management

All data will be collected in RedCap. Data will be pseudoanonymized and managed and analyzed using STATA or R in collaboration with a biostatistician

For each participant information on pre-defined clinical parameters upon arrival will be obtained from the medical record including symptoms, signs, disease severity, vital parameters, triage at arrival, comorbidities, functional status, resident status, prior antibiotics prescriptions, and medical history.

Other variables from the medical record that will be registered are length of stay, re-admission, admission to intensive care unit, prescribed antibiotic treatment, in-hospital mortality, 30-days and 90-days mortality, *Clostridium difficile* infections, and chest X-ray.

## Monitoring

The daily inclusion of participants will be monitored by the steering committee and the numbers of inclusion will be instantly available for all the included centers on a home page. No interim analysis will be made. The primary analysis of data will be performed by the project assistants after the last patient has been included and all analysis performed. The results will be discussed and evaluated first in the steering committee and afterwards with all the included departments.

## Sample size calculation and data analysis

According to the objectives, the study has been divided into sub-studies for each the primary outcome, statistical analysis, and sample size is presented.

Patient characteristics associated to verified diagnosis, according to expert panel reference standard, will be presented with descriptive results. Logistic univariate and multivariate analysis will be carried out for selected risk indicators, including confounders in the final analysis. At least 10 variables have to be analyzed, so at least 150 patients with a particular verified diagnosis are needed (50+10 events/variable).

The diagnostic values of CRP, PCT, and suPAR in track A and B are determined using the expert panel reference standard. Diagnostic accuracy will be conducted, and an optimal cut-off value for each parameter will be identified from receiver operating characteristic (ROC) curves. The study is designed to be able to find a difference in area under the curve (AUC) from 0.7 to 0.8 between two tests, which requires 200 verified CAP cases and 200 controls (power 0.8, alpha 0.05, AUC below 0 hypothesis 0.7) and 150 verified pyelonephritis cases and 150 controls (power 0.8, alpha 0.05, AUC below 0-hypothesis 0.6) (42).



9

To determine the diagnostic accuracy of POC-UFC to exclude bacteriuria, the urine culture will be used as reference standard. Diagnostic accuracy will be conducted, and Youden index analysis will be used to estimate the best cut-off. Urine culture shows significant growth of uropathogenic bacterium in approximately 50% of people with suspected pyelonephritis(25). Asymptomatic bacteriuria accounts for about 20% in the elderly population, depending on gender and age (43), which among 1000 inpatients suspected of infection, of which 15% have pyelonephritis, gives a sensitivity of 50% (95% CI: 42-58 %) and a negative predictive value of 90% (95% CI: 77-83%). With the expectation of identifying at least 150 cases of pyelonephritis among our study population, an improvement in sensitivity to 70% (95% CI: 62-77%) and negative predictive value to 95% (95% CI: 93 -96%) could be found with 95% security.

To determine how effective the addition of POC-PCR analysis of sputum is on antibiotic prescription in track A (superiority randomized trial), the primary outcome is targeted versus non-targeted antibiotic treatment prescribed at four hours after admission. Targeted treatment is defined as narrow spectrum antibiotics directed against CAP, antibiotics directed against a detected respiratory pathogen or no antibiotics (e.g. in the absence of a bacterial pathogen and/or presence of a viral pathogen). Non-targeted treatment is defined as broad spectrum antibiotics not directed against a specific pathogen or antibiotics not directed against CAP. The analyses will follow the intention-to-treat principal and a hierarchical mixed effect logistic model will be utilized to analyze the primary outcome to accommodate the hierarchical structure of the random effect, which manifest according to different personnel collecting the samples and geographical variation. To achieve a power of 82% for the main analysis, 200 patients with suspected CAP must be included. To accommodate the bias presented in (44) the generalized mixed effect models will be adjusted for strong predictors. If the sample size is not sufficient for a generalized mixed effect models the corresponding univariate analysis will be conducted.

The diagnostic accuracy of POC-US and ULDCT to identify inflammatory changes in the lungs and diagnose CAP in track A is determined using the expert panel reference standard. It is assumed that the reference standard will find 98% of the patients and index test 90%. With a power of 80%, at least 132 patients with verified CAP should be included (one-sided McNemar test).

The diagnostic accuracy of specialist US to identify inflammatory changes in the kidneys compatible with APN in track B is determined using the MRI as reference standard. It is assumed that the reference standard finds 98% of patients and index test 90%. With a power of 80%, at least 132 patients must be included (one-sided McNemar test).

The diagnostic accuracy of POC-US to identify hydronephrosis in track B is determined using MRI as reference standard. It is assumed that the reference standard finds 98% of patients and index test 90%. With a power of 80%, at least 132 patients must be included (one-sided McNemar test).

Annually, 5.7% of patients admitted to an ED are diagnosed with CAP and 2.4% with APNs (data from the ED at Hospital Sønderjylland). Taking into account exclusion criteria, weekends/holidays/missing data, and experience in patient recruitment, it is estimated that at least 1000 patients admitted with suspected infection must be included in the study from the three hospitals over a 7-month period, of which at least 200 patients will be diagnosed with pneumonia and at least 150 patients with pyelonephritis.

Non-participant analysis is performed. For missing data multiple imputation is used.

## Ethics and dissemination

The project was approved by the Regional Committees on Health Research Ethics for Southern Denmark (S-20200188), registered by the Danish Data Protection Agency (no. 20/60508) and by clinicaltrials.gov (NCT: 04661085, 04681963, 04667195, 04652167, 04686318, 04686292, 04651712, 04645030, and 04651244). Registration date was

10

1  
2 November-December 2020. Signed informed consent will be obtained from all participants after information of the  
3 project has been given both in writing and orally.  
4

5  
6 Participation in track A will contain additional imaging. Patients under the age of 40 are therefore excluded from the  
7 CT due to the extra risk of developing cancer from the radiation. A local hospital physicist has helped with the  
8 following calculations: A typical HRCT gives a radiation dose of approximately 2.2 mSv which corresponds to a cancer  
9 risk of 1:9100. An X-ray gives a radiation dose of approximately 0.06 mSv which corresponds to a cancer risk of  
10 1:333330. An ULDCT gives a radiation dose of approximately 0.1 mSv which corresponds to a cancer risk of 1:200000.  
11 Participation in track A gives each participant approximately 2.26 mSv (ULDCT and HRCT) which corresponds to a  
12 cancer risk of 1:8850(45-48). The examination time of ULDCT and HRCT is approximately 10 minutes.  
13  
14

15  
16 Use of US contrast in rare cases cause allergic reactions; less than 1/10.000 exponents require medical treatment  
17 due to allergic reaction (49). The examination time of advanced US is approximately 20 minutes.  
18

19  
20 MRI does not provide any radiation dose to the patients and is without intravenous contrast. The examination time  
21 is approximately 45 minutes, which is aligned with normal MRI examination time.  
22

23  
24 Overall, risks related to participation in the study is considered minimal, and furthermore, chances are that the  
25 additional diagnostic imaging will inform the clinician in a favorable way before the onset of patient treatment.  
26

#### 27 **Protocol amendments**

28 Important protocol modifications like changes in eligibility criteria or outcome will be communicated to the relevant  
29 parties, i.e. sponsor, trial registry and scientific ethical committee.  
30

#### 31 **Dissemination policy**

32 The results of the study will be presented in at least ten English peer-reviewed recognized scientific journals. The  
33 results of the project will also be disseminated through participation in academic and other conferences, as well as  
34 through the printed and electronic press. The author panel will include the steering committee, project assistants,  
35 and local coordinators in accordance with the Vancouver criteria. No professional writers will be used. Positive,  
36 negative and inconclusive results will be published. Diagnostic accuracy studies will follow the guidelines for  
37 reporting diagnostic accuracy studies (STARD) (50), cross sectional studies will follow the guidelines for  
38 strengthening the reporting of observational studies in epidemiology (STROBE) (51), and randomized studies will  
39 follow the consolidated standards of reporting trials (CONSORT) (52).  
40  
41  
42

#### 43 **Access to data**

44 Only the members of the steering committee and project assistants will have access to the final trial dataset. Other  
45 researches may be granted access to the anonymized data for analysis on reasonable request to the corresponding  
46 authors.  
47  
48  
49

## 50 **Discussion**

51 After completion of the study, a novel diagnostic algorithm will be developed. Subsequently, the plan is to test the  
52 algorithm in a national setting including at least eight EDs. The results can be implemented in daily work and  
53 routines. The study will also be able to characterize the patients, who are diagnosed at the ED with an infection of  
54 unknown origin and prescribed broad-spectrum antibiotics.  
55  
56

57 The results of the study will have both national and international interest, as the challenges are common and the  
58 solutions can easily be applied in hospitals with a similar technological context. Securing rapid and reliable diagnosis  
59 of two of the most common infections diagnosed in the ED, will encourage the reduction of broad-spectrum  
60 antibiotics and thereby the development of multi-resistant bacteria.

11

## Declarations

**Abbreviations:** acute pyelonephritis (APN), Anatomical therapeutic chemical (ATC), area under the curve (AUC), community-acquired pneumonia (CAP), cluster of differentiation 4 (CD4), contrast enhanced ultrasound (CEUS), Coronavirus Disease 2019 (COVID-19), C-reactive protein (CRP), emergency department (ED), human immunodeficiency virus (HIV), high-resolution dose computed tomography (HRCT), magnetic resonance imaging (MRI), Objective Structured Assessment of US Skills (OASUS), polymerase-chain-reaction (PCR), serum procalcitonin (PCT), Point-of-care (POC), receiver operating characteristic (ROC), Soluble urokinase plasminogen activator receptor (suPAR), urine flow cytometry (UFC), ultralow dose computed tomography (ULDCT), and ultrasound (US).

**Protocol version:** January 25<sup>th</sup> 2021, version 1.0

**Ethics approval:** The project was approved by the Regional Committees on Health Research Ethics for Southern Denmark (S-20200188), registered by the Danish Data Protection Agency (20/60508) and by clinicaltrials.gov (NCT: 04661085, 04681963, 04667195, 04652167, 04686318, 04686292, 04651712, 04645030, and 04651244). Each patient provided written informed consent.

**Data sharing statement:** Due to Danish laws on personal data, data cannot be shared publicly. To request these data, please contact the corresponding author for more information.

**Competing interests:** The authors declare that they have no competing interests

**Patient and Public Involvement:** The patients or public were not involved in the development of the research question or the study design.

**Funding:** This work was supported by the Region of Southern Denmark (Damhaven 12, 7100 Vejle, Denmark; kontakt@rsyd.dk), University of Southern Denmark (Campusvej 55, 5230 Odense, Denmark; sdu@sdu.dk), and Hospital Sønderjylland (Kresten Philipsensvej 15, 6200 Aabenraa, Denmark; shs.kontakt@rsyd.dk). The financial sponsors had no influence on the data, analysis, results, or content of publication.

**Authors' contributions:** HS, OG, FSR, ERBP, CØ, CBL, TAS, SP, MBC, and CBM conceptualized and all authors designed the study and data collection in detail. HS, AH, MHL, MBC, and CBM reviewed the literature. AH, MHL, MBC, and MAH will recruit participants, and HS, OG, FSR, ERBP, CØ, CBL, TAS, SP, MBC, and CBM will supervise data collection and analysis. HS, AH, MHL, MBC, MAH, and CBM will carry out statistical analysis and write the first manuscripts, which will be critically reviewed by all authors, who will finally approve the manuscripts before submission. HS and CBM are responsible for the overall content as guarantors. The corresponding author attests that all listed authors meet authorship criteria and that no others meeting the criteria have been omitted.

**Steering committee:** Composed of representatives from the involved type of departments: emergency, microbiology, biochemistry, and radiology. The role of the committee is to develop the scientific framework of the study, make final decisions on major issues during the data collection and data management period. The committee is responsible for all financial issues. Members of the steering committee are HS, OG, FSR, ERBP, and CBM.

**Participating departments:** All departments are located in Denmark  
Emergency Department, Hospital Sønderjylland, Aabenraa. Emergency Department, Hospital Lillebælt, Kolding.  
Emergency Department, Odense University Hospital, Odense.  
Radiology Department, Hospital Sønderjylland, Aabenraa. Radiology Department, Hospital Lillebælt, Kolding.  
Radiology Department, Odense University Hospital, Odense.  
Department of Microbiology, Hospital Sønderjylland, Sønderborg. Department of Clinical Microbiology, Lillebælt Hospital, Vejle. Department of Clinical Microbiology, Odense University Hospital, Odense.  
Bloodsamples, Biochemistry and Immunology, Hospital Sønderjylland, Aabenraa. Biochemistry and Immunology, Lillebælt Hospital, Kolding and Vejle. Clinical Biochemistry and Pharmacology, Odense University Hospital, Odense.

12

1  
2 **Acknowledgements:** In performing our protocol, we received help and guidance from some respected persons, who  
3 deserve our greatest gratitude: Research Radiographer Bo Mussmann from Radiology Department at Odense  
4 University Hospital in Denmark, Professor Michael Pedersen from Department of Clinical Medicine at Aarhus  
5 University Hospital in Denmark, Professor Ivan Brandslund from Department of Clinical Biochemistry at Sygehus  
6 Lillebælt in Denmark, and Research assistant Mette Bach Nielsen from Emergency Department at Hospital  
7 Sønderjylland in Denmark.  
8  
9  
10  
11  
12  
13  
14  
15  
16  
17  
18  
19  
20  
21  
22  
23  
24  
25  
26  
27  
28  
29  
30  
31  
32  
33  
34  
35  
36  
37  
38  
39  
40  
41  
42  
43  
44  
45  
46  
47  
48  
49  
50  
51  
52  
53  
54  
55  
56  
57  
58  
59  
60

For peer review only

13

## Literature references

1. WHO. Antimicrobial resistance - Global report and surveillance. France: World Health Organization; 2014.
2. Bager FE-I, J.; Larsen, AR.; Sönksen, UW. DANMAP 2018 - Use of antimicrobial agents and occurrence of antimicrobial resistance in bacteria from food animals, food and humans in Denmark. 2018.
3. Skjøt-Arkil H, Mogensen CB, Lassen AT, Johansen IS, Chen M, Petersen P, et al. Carrier prevalence and risk factors for colonisation of multiresistant bacteria in Danish emergency departments: a cross-sectional survey. *BMJ Open*. 2019;9(6):e029000.
4. Sundhedsstyrelsen. Vejledning om ordination af antibiotika. Copenhagen: Danish Health Organisation; 2012.
5. Sundhedsstyrelsen. Vejledning om forebyggelse af spredning af MRSA. 2016.
6. Sundhedsstyrelsen. Vejledning og forebyggelse af om spredning af CPO. 2018.
7. Ældreministeriet S-o. National handlingsplan for antibiotika til mennesker - tre målbare mål for en reduktion af antibiotikaforbruget frem mod 2020. 2017.
8. Hellesøe AM, CB.; Anhøj, J.; Jensen, JN.; Bak, H.; Ellermann-Eriksen, S.; Christian, T.;. LKT Antibiotika afslutnings- og evalueringsrapport. 2019.
9. Cartuliales MB, Sundal LM, Gustavsson S, Skjøt-Arkil H, Mogensen CB. Limited value of sputum culture to guide antibiotic treatment in a Danish emergency department. *Dan Med J*. 2020;67(11).
10. Funk DJ, Kumar A. Antimicrobial therapy for life-threatening infections: speed is life. *Crit Care Clin*. 2011;27(1):53-76.
11. The top 10 causes of death: World Health Organization; 2018 [Available from: <https://www.who.int/news-room/fact-sheets/detail/the-top-10-causes-of-death> (accessed July 2019).
12. Kennedy M, Joyce N, Howell MD, Lawrence Mottley J, Shapiro NI. Identifying infected emergency department patients admitted to the hospital ward at risk of clinical deterioration and intensive care unit transfer. *Acad Emerg Med*. 2010;17(10):1080-5.
13. Chandra A, Nicks B, Maniago E, Nouh A, Limkakeng A. A multicenter analysis of the ED diagnosis of pneumonia. *Am J Emerg Med*. 2010;28(8):862-5.
14. Reed WW, Byrd GS, Gates RH, Jr., Howard RS, Weaver MJ. Sputum gram's stain in community-acquired pneumococcal pneumonia. A meta-analysis. *West J Med*. 1996;165(4):197-204.
15. Schuetz P, Christ-Crain M, Muller B. Procalcitonin and other biomarkers to improve assessment and antibiotic stewardship in infections--hope for hype? *Swiss Med Wkly*. 2009;139(23-24):318-26.
16. Savvateeva EN, Rubina AY, Gryadunov DA. Biomarkers of Community-Acquired Pneumonia: A Key to Disease Diagnosis and Management. *Biomed Res Int*. 2019;2019:1701276.
17. Hey J, Thompson-Leduc P, Kirson NY, Zimmer L, Wilkins D, Rice B, et al. Procalcitonin guidance in patients with lower respiratory tract infections: a systematic review and meta-analysis. *Clin Chem Lab Med*. 2018;56(8):1200-9.
18. Self WH, Balk RA, Grijalva CG, Williams DJ, Zhu Y, Anderson EJ, et al. Procalcitonin as a Marker of Etiology in Adults Hospitalized With Community-Acquired Pneumonia. *Clin Infect Dis*. 2017;65(2):183-90.
19. Hamie L, Daoud G, Nemer G, Nammour T, El Chediak A, Uthman IW, et al. SuPAR, an emerging biomarker in kidney and inflammatory diseases. *Postgrad Med J*. 2018;94(1115):517-24.
20. Masajtis-Zagajewska A, Nowicki M. New markers of urinary tract infection. *Clin Chim Acta*. 2017;471:286-91.
21. Caterino JM, Leininger R, Kline DM, Southerland LT, Khaliqdina S, Baugh CW, et al. Accuracy of Current Diagnostic Criteria for Acute Bacterial Infection in Older Adults in the Emergency Department. *J Am Geriatr Soc*. 2017;65(8):1802-9.
22. Bourcier JE, Paquet J, Seinger M, Gallard E, Redonnet JP, Cheddadi F, et al. Performance comparison of lung ultrasound and chest x-ray for the diagnosis of pneumonia in the ED. *Am J Emerg Med*. 2014;32(2):115-8.
23. Orso D, Guglielmo N, Copetti R. Lung ultrasound in diagnosing pneumonia in the emergency department: a systematic review and meta-analysis. *Eur J Emerg Med*. 2018;25(5):312-21.
24. Claeys KC, Blanco N, Morgan DJ, Leekha S, Sullivan KV. Advances and Challenges in the Diagnosis and Treatment of Urinary Tract Infections: the Need for Diagnostic Stewardship. *Curr Infect Dis Rep*. 2019;21(4):11.
25. Shallcross L, Gaskell K, Fox-Lewis A, Bergstrom M, Noursadeghi M. Mismatch between suspected pyelonephritis and microbiological diagnosis: a cohort study from a UK teaching hospital. *J Hosp Infect*. 2018;98(2):219-22.
26. Quiaia E, Correas JM, Mehta M, Murchison JT, Gennari AG, van Beek EJR. Gray Scale Ultrasound, Color Doppler Ultrasound, and Contrast-Enhanced Ultrasound in Renal Parenchymal Diseases. *Ultrasound Q*. 2018;34(4):250-67.



14

27. Mitterberger M, Pinggera GM, Colleselli D, Bartsch G, Strasser H, Steppan I, et al. Acute pyelonephritis: comparison of diagnosis with computed tomography and contrast-enhanced ultrasonography. *BJU Int*. 2008;101(3):341-4.
28. Kazmierski B, Deurdulian C, Tchelepi H, Grant EG. Applications of contrast-enhanced ultrasound in the kidney. *Abdom Radiol (NY)*. 2018;43(4):880-98.
29. Huang HS, Tsai CL, Chang J, Hsu TC, Lin S, Lee CC. Multiplex PCR system for the rapid diagnosis of respiratory virus infection: systematic review and meta-analysis. *Clin Microbiol Infect*. 2018;24(10):1055-63.
30. Long B, Koyfman A. The Emergency Department Diagnosis and Management of Urinary Tract Infection. *Emerg Med Clin North Am*. 2018;36(4):685-710.
31. Rowe TA, Juthani-Mehta M. Diagnosis and management of urinary tract infection in older adults. *Infect Dis Clin North Am*. 2014;28(1):75-89.
32. Institut SS. Urinvejsinfektioner: Blærebetændelse og nyrebækkenbetændelse Statens Serum Institut: Statens Serum Institut; 2017 [Available from: <https://www.ssi.dk/sygdomme-beredskab-og-forskning/sygdomsleksikon/u/urinvejsinfektioner> (Accessed April 2019)].
33. Herraes O, Asencio MA, Carranza R, Jarabo MM, Huertas M, Redondo O, et al. Sysmex UF-1000i flow cytometer to screen urinary tract infections: the URISCAM multicentre study. *Lett Appl Microbiol*. 2018;66(3):175-81.
34. Chan AW, Tetzlaff JM, Altman DG, Laupacis A, Gøtzsche PC, Krleža-Jerić K, et al. SPIRIT 2013 statement: defining standard protocol items for clinical trials. *Ann Intern Med*. 2013;158(3):200-7.
35. The Region of Southern Denmark traw. Den Regionale Antibiotikagruppe. Diagnostik og behandling af akutte infektioner på sygehusene i Region Syddanmark. 2016.
36. Skovsted TA, Petersen ERB, Fruekilde MB, Pedersen AK, Pielak T, Eugen-Olsen J. Validation of suPAR turbidimetric assay on Cobas® (c502 and c702) and comparison to suPAR ELISA. *Scand J Clin Lab Invest*. 2020;80(4):327-35.
37. BioFire. 2018. FilmArray Pneumonia panel instruction booklet RFIT-ASY0144/145. BioFire SLC, UT.
38. Harris PA, Taylor R, Thielke R, Payne J, Gonzalez N, Conde JG. Research electronic data capture (REDCap)—a metadata-driven methodology and workflow process for providing translational research informatics support. *Journal of biomedical informatics*. 2009;42(2):377-81.
39. Volpicelli G, Elbarbary M, Blaivas M, Lichtenstein DA, Mathis G, Kirkpatrick AW, et al. International evidence-based recommendations for point-of-care lung ultrasound. *Intensive Care Med*. 2012;38(4):577-91.
40. Laursen CB, Clive A, Hallifax R, Pietersen PI, Asciak R, Davidsen JR, et al. European Respiratory Society Statement on Thoracic Ultrasound. *Eur Respir J*. 2020.
41. Laursen BLG, O.; Davidsen, J. R. et. al. Basal klinisk ultralydsdiagnostik. Copenhagen: Munksgaard; 2017. Available from: <https://basal-klinisk-ultralydsdiagnostik.munksgaard.dk/>.
42. Biosoft. easyROC: a web-tool for ROC curve analysis [1.3.1:[Available from: <http://www.biosoft.hacettepe.edu.tr/easyROC/> (Accessed January 3rd 2020)].
43. Mody L, Juthani-Mehta M. Urinary tract infections in older women: a clinical review. *JAMA*. 2014;311(8):844-54.
44. GAIL MH, WIEAND S, PIANTADOSI S. Biased estimates of treatment effect in randomized experiments with nonlinear regressions and omitted covariates. *Biometrika*. 1984;71(3):431-44.
45. Huda W, Ogden KM, Khorasani MR. Converting dose-length product to effective dose at CT. *Radiology*. 2008;248(3):995-1003.
46. Sodickson A, Baeyens PF, Andriole KP, Prevedello LM, Nawfel RD, Hanson R, et al. Recurrent CT, cumulative radiation exposure, and associated radiation-induced cancer risks from CT of adults. *Radiology*. 2009;251(1):175-84.
47. Brenner DJ, Hall EJ. Computed tomography--an increasing source of radiation exposure. *N Engl J Med*. 2007;357(22):2277-84.
48. Mayo-Smith WW, Hara AK, Mahesh M, Sahani DV, Pavlicek W. How I do it: managing radiation dose in CT. *Radiology*. 2014;273(3):657-72.
49. Chong WK, Papadopoulou V, Dayton PA. Imaging with ultrasound contrast agents: current status and future. *Abdom Radiol (NY)*. 2018;43(4):762-72.
50. Cohen JF, Korevaar DA, Altman DG, Bruns DE, Gatsonis CA, Hooft L, et al. STARD 2015 guidelines for reporting diagnostic accuracy studies: explanation and elaboration. *BMJ Open*. 2016;6(11):e012799.
51. Vandenbroucke JP, von Elm E, Altman DG, Gøtzsche PC, Mulrow CD, Pocock SJ, et al. Strengthening the Reporting of Observational Studies in Epidemiology (STROBE): explanation and elaboration. *PLoS Med*. 2007;4(10):e297.

15

- 52. Moher D, Hopewell S, Schulz KF, Montori V, Gøtzsche PC, Devereaux PJ, et al. CONSORT 2010 explanation and elaboration: updated guidelines for reporting parallel group randomised trials. *BMJ*. 2010;340:c869.

For peer review only

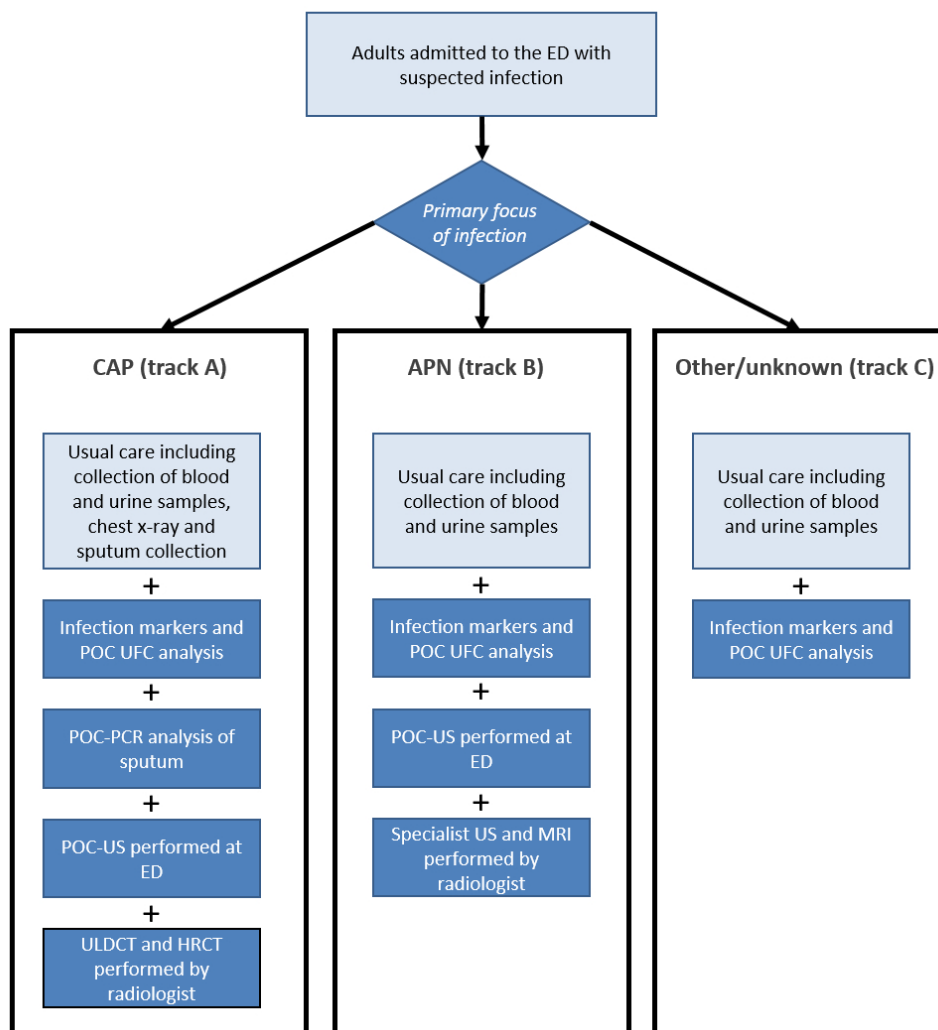

Figure 1 Design of patient flow and diagnostic tracks

170x182mm (150 x 150 DPI)



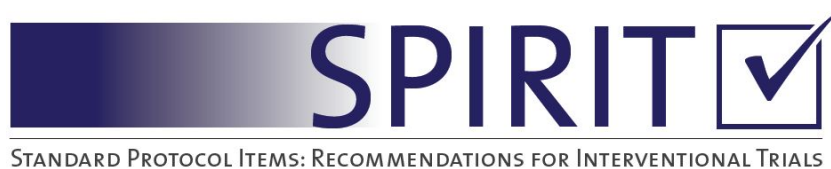

STANDARD PROTOCOL ITEMS: RECOMMENDATIONS FOR INTERVENTIONAL TRIALS

## Completed SPIRIT checklist

| Section/item                      | ItemNo | Description                                                                                                                                                                                                                                                                              | Page in protocol |
|-----------------------------------|--------|------------------------------------------------------------------------------------------------------------------------------------------------------------------------------------------------------------------------------------------------------------------------------------------|------------------|
| <b>Administrative information</b> |        |                                                                                                                                                                                                                                                                                          |                  |
| Title                             | 1      | Descriptive title identifying the study design, population, interventions, and, if applicable, trial acronym                                                                                                                                                                             | 1                |
| Trial registration                | 2a     | Trial identifier and registry name. If not yet registered, name of intended registry                                                                                                                                                                                                     | 1                |
|                                   | 2b     | All items from the World Health Organization Trial Registration Data Set                                                                                                                                                                                                                 | -                |
| Protocol version                  | 3      | Date and version identifier                                                                                                                                                                                                                                                              | 11               |
| Funding                           | 4      | Sources and types of financial, material, and other support                                                                                                                                                                                                                              | 12               |
| Roles and responsibilities        | 5a     | Names, affiliations, and roles of protocol contributors                                                                                                                                                                                                                                  | 12               |
|                                   | 5b     | Name and contact information for the trial sponsor                                                                                                                                                                                                                                       | 12               |
|                                   | 5c     | Role of study sponsor and funders, if any, in study design; collection, management, analysis, and interpretation of data; writing of the report; and the decision to submit the report for publication, including whether they will have ultimate authority over any of these activities | 12               |
|                                   | 5d     | Composition, roles, and responsibilities of the coordinating centre, steering committee, endpoint adjudication committee, data management team, and other individuals or groups overseeing the trial, if applicable (see Item 21a for data monitoring committee)                         | 12               |
| <b>Introduction</b>               |        |                                                                                                                                                                                                                                                                                          |                  |
| Background and rationale          | 6a     | Description of research question and justification for undertaking the trial, including summary of relevant studies (published and unpublished) examining benefits and harms for each intervention                                                                                       | 3-4              |
|                                   | 6b     | Explanation for choice of comparators                                                                                                                                                                                                                                                    | 3-4              |
| Objectives                        | 7      | Specific objectives or hypotheses                                                                                                                                                                                                                                                        | 4-5              |

|    |                                                           |     |                                                                                                                                                                                                                                                                                                                                                                                |           |
|----|-----------------------------------------------------------|-----|--------------------------------------------------------------------------------------------------------------------------------------------------------------------------------------------------------------------------------------------------------------------------------------------------------------------------------------------------------------------------------|-----------|
| 1  |                                                           |     |                                                                                                                                                                                                                                                                                                                                                                                |           |
| 2  | Trial design                                              | 8   | Description of trial design including type of trial (eg, parallel group, crossover, factorial, single group), allocation ratio, and framework (eg, superiority, equivalence, noninferiority, exploratory)                                                                                                                                                                      | 5<br>9-10 |
| 3  |                                                           |     |                                                                                                                                                                                                                                                                                                                                                                                |           |
| 4  |                                                           |     |                                                                                                                                                                                                                                                                                                                                                                                |           |
| 5  |                                                           |     |                                                                                                                                                                                                                                                                                                                                                                                |           |
| 6  |                                                           |     |                                                                                                                                                                                                                                                                                                                                                                                |           |
| 7  |                                                           |     |                                                                                                                                                                                                                                                                                                                                                                                |           |
| 8  | <b>Methods: Participants, interventions, and outcomes</b> |     |                                                                                                                                                                                                                                                                                                                                                                                |           |
| 9  |                                                           |     |                                                                                                                                                                                                                                                                                                                                                                                |           |
| 10 | Study setting                                             | 9   | Description of study settings (eg, community clinic, academic hospital) and list of countries where data will be collected. Reference to where list of study sites can be obtained                                                                                                                                                                                             | 5         |
| 11 |                                                           |     |                                                                                                                                                                                                                                                                                                                                                                                |           |
| 12 |                                                           |     |                                                                                                                                                                                                                                                                                                                                                                                |           |
| 13 |                                                           |     |                                                                                                                                                                                                                                                                                                                                                                                |           |
| 14 | Eligibility criteria                                      | 10  | Inclusion and exclusion criteria for participants. If applicable, eligibility criteria for study centres and individuals who will perform the interventions (eg, surgeons, psychotherapists)                                                                                                                                                                                   | 5-6       |
| 15 |                                                           |     |                                                                                                                                                                                                                                                                                                                                                                                |           |
| 16 |                                                           |     |                                                                                                                                                                                                                                                                                                                                                                                |           |
| 17 |                                                           |     |                                                                                                                                                                                                                                                                                                                                                                                |           |
| 18 |                                                           |     |                                                                                                                                                                                                                                                                                                                                                                                |           |
| 19 | Interventions                                             | 11a | Interventions for each group with sufficient detail to allow replication, including how and when they will be administered                                                                                                                                                                                                                                                     | 7-8       |
| 20 |                                                           |     |                                                                                                                                                                                                                                                                                                                                                                                |           |
| 21 |                                                           |     |                                                                                                                                                                                                                                                                                                                                                                                |           |
| 22 |                                                           | 11b | Criteria for discontinuing or modifying allocated interventions for a given trial participant (eg, drug dose change in response to harms, participant request, or improving/worsening disease)                                                                                                                                                                                 | 7-8       |
| 23 |                                                           |     |                                                                                                                                                                                                                                                                                                                                                                                |           |
| 24 |                                                           |     |                                                                                                                                                                                                                                                                                                                                                                                |           |
| 25 |                                                           |     |                                                                                                                                                                                                                                                                                                                                                                                |           |
| 26 |                                                           | 11c | Strategies to improve adherence to intervention protocols, and any procedures for monitoring adherence (eg, drug tablet return, laboratory tests)                                                                                                                                                                                                                              | -         |
| 27 |                                                           |     |                                                                                                                                                                                                                                                                                                                                                                                |           |
| 28 |                                                           |     |                                                                                                                                                                                                                                                                                                                                                                                |           |
| 29 |                                                           |     |                                                                                                                                                                                                                                                                                                                                                                                |           |
| 30 |                                                           |     |                                                                                                                                                                                                                                                                                                                                                                                |           |
| 31 |                                                           | 11d | Relevant concomitant care and interventions that are permitted or prohibited during the trial                                                                                                                                                                                                                                                                                  | 7-8       |
| 32 |                                                           |     |                                                                                                                                                                                                                                                                                                                                                                                |           |
| 33 |                                                           |     |                                                                                                                                                                                                                                                                                                                                                                                |           |
| 34 | Outcomes                                                  | 12  | Primary, secondary, and other outcomes, including the specific measurement variable (eg, systolic blood pressure), analysis metric (eg, change from baseline, final value, time to event), method of aggregation (eg, median, proportion), and time point for each outcome. Explanation of the clinical relevance of chosen efficacy and harm outcomes is strongly recommended | 8-10      |
| 35 |                                                           |     |                                                                                                                                                                                                                                                                                                                                                                                |           |
| 36 |                                                           |     |                                                                                                                                                                                                                                                                                                                                                                                |           |
| 37 |                                                           |     |                                                                                                                                                                                                                                                                                                                                                                                |           |
| 38 |                                                           |     |                                                                                                                                                                                                                                                                                                                                                                                |           |
| 39 |                                                           |     |                                                                                                                                                                                                                                                                                                                                                                                |           |
| 40 |                                                           |     |                                                                                                                                                                                                                                                                                                                                                                                |           |
| 41 |                                                           |     |                                                                                                                                                                                                                                                                                                                                                                                |           |
| 42 | Participant timeline                                      | 13  | Time schedule of enrolment, interventions (including any run-ins and washouts), assessments, and visits for participants. A schematic diagram is highly recommended (see Figure)                                                                                                                                                                                               | 6         |
| 43 |                                                           |     |                                                                                                                                                                                                                                                                                                                                                                                |           |
| 44 |                                                           |     |                                                                                                                                                                                                                                                                                                                                                                                |           |
| 45 |                                                           |     |                                                                                                                                                                                                                                                                                                                                                                                |           |
| 46 | Sample size                                               | 14  | Estimated number of participants needed to achieve study objectives and how it was determined, including clinical and statistical assumptions supporting any sample size calculations                                                                                                                                                                                          | 9-10      |
| 47 |                                                           |     |                                                                                                                                                                                                                                                                                                                                                                                |           |
| 48 |                                                           |     |                                                                                                                                                                                                                                                                                                                                                                                |           |
| 49 |                                                           |     |                                                                                                                                                                                                                                                                                                                                                                                |           |
| 50 |                                                           |     |                                                                                                                                                                                                                                                                                                                                                                                |           |
| 51 | Recruitment                                               | 15  | Strategies for achieving adequate participant enrolment to reach target sample size                                                                                                                                                                                                                                                                                            | 77        |
| 52 |                                                           |     |                                                                                                                                                                                                                                                                                                                                                                                |           |
| 53 |                                                           |     |                                                                                                                                                                                                                                                                                                                                                                                |           |

#### Methods: Assignment of interventions (for controlled trials)

Allocation:

|    |                                                           |     |                                                                          |      |
|----|-----------------------------------------------------------|-----|--------------------------------------------------------------------------|------|
| 1  |                                                           |     |                                                                          |      |
| 2  | Sequence                                                  | 16a | Method of generating the allocation sequence (eg, computer-              |      |
| 3  | generation                                                |     | generated random numbers), and list of any factors for stratification.   |      |
| 4  |                                                           |     | To reduce predictability of a random sequence, details of any planned    | 7    |
| 5  |                                                           |     | restriction (eg, blocking) should be provided in a separate document     |      |
| 6  |                                                           |     | that is unavailable to those who enrol participants or assign            |      |
| 7  |                                                           |     | interventions                                                            |      |
| 8  |                                                           |     |                                                                          |      |
| 9  |                                                           |     |                                                                          |      |
| 10 | Allocation                                                | 16b | Mechanism of implementing the allocation sequence (eg, central           |      |
| 11 | concealme                                                 |     | telephone; sequentially numbered, opaque, sealed envelopes),             | 7    |
| 12 | nt                                                        |     | describing any steps to conceal the sequence until interventions are     |      |
| 13 | mechanism                                                 |     | assigned                                                                 |      |
| 14 |                                                           |     |                                                                          |      |
| 15 | Implementa                                                | 16c | Who will generate the allocation sequence, who will enrol participants,  | 7    |
| 16 | tion                                                      |     | and who will assign participants to interventions                        |      |
| 17 |                                                           |     |                                                                          |      |
| 18 |                                                           |     |                                                                          |      |
| 19 | Blinding                                                  | 17a | Who will be blinded after assignment to interventions (eg, trial         | 7    |
| 20 | (masking)                                                 |     | participants, care providers, outcome assessors, data analysts), and     |      |
| 21 |                                                           |     | how                                                                      |      |
| 22 |                                                           |     |                                                                          |      |
| 23 |                                                           | 17b | If blinded, circumstances under which unblinding is permissible, and     | -    |
| 24 |                                                           |     | procedure for revealing a participant's allocated intervention during    |      |
| 25 |                                                           |     | the trial                                                                |      |
| 26 |                                                           |     |                                                                          |      |
| 27 |                                                           |     |                                                                          |      |
| 28 | <b>Methods: Data collection, management, and analysis</b> |     |                                                                          |      |
| 29 |                                                           |     |                                                                          |      |
| 30 | Data collection                                           | 18a | Plans for assessment and collection of outcome, baseline, and other      |      |
| 31 | methods                                                   |     | trial data, including any related processes to promote data quality (eg, | 8-9  |
| 32 |                                                           |     | duplicate measurements, training of assessors) and a description of      |      |
| 33 |                                                           |     | study instruments (eg, questionnaires, laboratory tests) along with      |      |
| 34 |                                                           |     | their reliability and validity, if known. Reference to where data        |      |
| 35 |                                                           |     | collection forms can be found, if not in the protocol                    |      |
| 36 |                                                           |     |                                                                          |      |
| 37 |                                                           |     |                                                                          |      |
| 38 |                                                           | 18b | Plans to promote participant retention and complete follow-up,           | -    |
| 39 |                                                           |     | including list of any outcome data to be collected for participants who  |      |
| 40 |                                                           |     | discontinue or deviate from intervention protocols                       |      |
| 41 |                                                           |     |                                                                          |      |
| 42 | Data                                                      | 19  | Plans for data entry, coding, security, and storage, including any       |      |
| 43 | management                                                |     | related processes to promote data quality (eg, double data entry;        | 8-9  |
| 44 |                                                           |     | range checks for data values). Reference to where details of data        |      |
| 45 |                                                           |     | management procedures can be found, if not in the protocol               |      |
| 46 |                                                           |     |                                                                          |      |
| 47 |                                                           |     |                                                                          |      |
| 48 | Statistical                                               | 20a | Statistical methods for analysing primary and secondary outcomes.        | 9-10 |
| 49 | methods                                                   |     | Reference to where other details of the statistical analysis plan can be |      |
| 50 |                                                           |     | found, if not in the protocol                                            |      |
| 51 |                                                           |     |                                                                          |      |
| 52 |                                                           | 20b | Methods for any additional analyses (eg, subgroup and adjusted           | -    |
| 53 |                                                           |     | analyses)                                                                |      |
| 54 |                                                           |     |                                                                          |      |
| 55 |                                                           | 20c | Definition of analysis population relating to protocol non-adherence     | 9-10 |
| 56 |                                                           |     | (eg, as randomised analysis), and any statistical methods to handle      |      |
| 57 |                                                           |     | missing data (eg, multiple imputation)                                   |      |
| 58 |                                                           |     |                                                                          |      |
| 59 |                                                           |     |                                                                          |      |
| 60 |                                                           |     |                                                                          |      |

1  
2 **Methods: Monitoring**  
3

|                   |     |                                                                                                                                                                                                                                                                                                                                       |    |
|-------------------|-----|---------------------------------------------------------------------------------------------------------------------------------------------------------------------------------------------------------------------------------------------------------------------------------------------------------------------------------------|----|
| 4 Data monitoring | 21a | Composition of data monitoring committee (DMC); summary of its role and reporting structure; statement of whether it is independent from the sponsor and competing interests; and reference to where further details about its charter can be found, if not in the protocol. Alternatively, an explanation of why a DMC is not needed | -  |
|                   | 21b | Description of any interim analyses and stopping guidelines, including who will have access to these interim results and make the final decision to terminate the trial                                                                                                                                                               | 9  |
| 15 Harms          | 22  | Plans for collecting, assessing, reporting, and managing solicited and spontaneously reported adverse events and other unintended effects of trial interventions or trial conduct                                                                                                                                                     | 8  |
| 19 Auditing       | 23  | Frequency and procedures for auditing trial conduct, if any, and whether the process will be independent from investigators and the sponsor                                                                                                                                                                                           | 12 |

24 **Ethics and dissemination**  
25

|                                  |     |                                                                                                                                                                                                                                  |    |
|----------------------------------|-----|----------------------------------------------------------------------------------------------------------------------------------------------------------------------------------------------------------------------------------|----|
| 26 Research ethics approval      | 24  | Plans for seeking research ethics committee/institutional review board (REC/IRB) approval                                                                                                                                        | 10 |
| 31 Protocol amendments           | 25  | Plans for communicating important protocol modifications (eg, changes to eligibility criteria, outcomes, analyses) to relevant parties (eg, investigators, REC/IRBs, trial participants, trial registries, journals, regulators) | 11 |
| 36 Consent or assent             | 26a | Who will obtain informed consent or assent from potential trial participants or authorised surrogates, and how (see Item 32)                                                                                                     | 7  |
|                                  | 26b | Additional consent provisions for collection and use of participant data and biological specimens in ancillary studies, if applicable                                                                                            | -  |
| 43 Confidentiality               | 27  | How personal information about potential and enrolled participants will be collected, shared, and maintained in order to protect confidentiality before, during, and after the trial                                             | 10 |
| 47 Declaration of interests      | 28  | Financial and other competing interests for principal investigators for the overall trial and each study site                                                                                                                    | 12 |
| 50 Access to data                | 29  | Statement of who will have access to the final trial dataset, and disclosure of contractual agreements that limit such access for investigators                                                                                  | 11 |
| 55 Ancillary and post-trial care | 30  | Provisions, if any, for ancillary and post-trial care, and for compensation to those who suffer harm from trial participation                                                                                                    | -  |

|    |                   |     |                                                                              |       |
|----|-------------------|-----|------------------------------------------------------------------------------|-------|
| 1  |                   |     |                                                                              |       |
| 2  | Dissemination     | 31a | Plans for investigators and sponsor to communicate trial results to          |       |
| 3  | policy            |     | participants, healthcare professionals, the public, and other relevant       | 11    |
| 4  |                   |     | groups (eg, via publication, reporting in results databases, or other        |       |
| 5  |                   |     | data sharing arrangements), including any publication restrictions           |       |
| 6  |                   |     |                                                                              |       |
| 7  |                   | 31b | Authorship eligibility guidelines and any intended use of professional       | 11    |
| 8  |                   |     | writers                                                                      |       |
| 9  |                   |     |                                                                              |       |
| 10 |                   | 31c | Plans, if any, for granting public access to the full protocol, participant- | 11    |
| 11 |                   |     | level dataset, and statistical code                                          |       |
| 12 |                   |     |                                                                              |       |
| 13 |                   |     |                                                                              |       |
| 14 | <b>Appendices</b> |     |                                                                              |       |
| 15 |                   |     |                                                                              |       |
| 16 | Informed          | 32  | Model consent form and other related documentation given to                  | Appen |
| 17 | consent           |     | participants and authorised surrogates                                       | dix I |
| 18 | materials         |     |                                                                              |       |
| 19 |                   |     |                                                                              |       |
| 20 | Biological        | 33  | Plans for collection, laboratory evaluation, and storage of biological       | Appen |
| 21 | specimens         |     | specimens for genetic or molecular analysis in the current trial and for     | dix I |
| 22 |                   |     | future use in ancillary studies, if applicable                               |       |
| 23 |                   |     |                                                                              |       |
| 24 |                   |     |                                                                              |       |
| 25 |                   |     |                                                                              |       |
| 26 |                   |     |                                                                              |       |
| 27 |                   |     |                                                                              |       |
| 28 |                   |     |                                                                              |       |
| 29 |                   |     |                                                                              |       |
| 30 |                   |     |                                                                              |       |
| 31 |                   |     |                                                                              |       |
| 32 |                   |     |                                                                              |       |
| 33 |                   |     |                                                                              |       |
| 34 |                   |     |                                                                              |       |
| 35 |                   |     |                                                                              |       |
| 36 |                   |     |                                                                              |       |
| 37 |                   |     |                                                                              |       |
| 38 |                   |     |                                                                              |       |
| 39 |                   |     |                                                                              |       |
| 40 |                   |     |                                                                              |       |
| 41 |                   |     |                                                                              |       |
| 42 |                   |     |                                                                              |       |
| 43 |                   |     |                                                                              |       |
| 44 |                   |     |                                                                              |       |
| 45 |                   |     |                                                                              |       |
| 46 |                   |     |                                                                              |       |
| 47 |                   |     |                                                                              |       |
| 48 |                   |     |                                                                              |       |
| 49 |                   |     |                                                                              |       |
| 50 |                   |     |                                                                              |       |
| 51 |                   |     |                                                                              |       |
| 52 |                   |     |                                                                              |       |
| 53 |                   |     |                                                                              |       |
| 54 |                   |     |                                                                              |       |
| 55 |                   |     |                                                                              |       |
| 56 |                   |     |                                                                              |       |
| 57 |                   |     |                                                                              |       |
| 58 |                   |     |                                                                              |       |
| 59 |                   |     |                                                                              |       |
| 60 |                   |     |                                                                              |       |

# BMJ Open

## Improved diagnostics of infectious diseases in Emergency Departments – a protocol of a multifaceted multicenter diagnostic study

|                               |                                                                                                                                                                                                                                                                                                                                                                                                                                                                                                                                                                                                                                                                                                                                                                                                                                                                                                                                                                                                                                                                                                                                                                                                                                                                                                                                                                                                                                                                                                                                                                                                                                                                                                                                                                                                                                                                                                                                                                                                                                                                                                                                                                                                                                                                                                                  |
|-------------------------------|------------------------------------------------------------------------------------------------------------------------------------------------------------------------------------------------------------------------------------------------------------------------------------------------------------------------------------------------------------------------------------------------------------------------------------------------------------------------------------------------------------------------------------------------------------------------------------------------------------------------------------------------------------------------------------------------------------------------------------------------------------------------------------------------------------------------------------------------------------------------------------------------------------------------------------------------------------------------------------------------------------------------------------------------------------------------------------------------------------------------------------------------------------------------------------------------------------------------------------------------------------------------------------------------------------------------------------------------------------------------------------------------------------------------------------------------------------------------------------------------------------------------------------------------------------------------------------------------------------------------------------------------------------------------------------------------------------------------------------------------------------------------------------------------------------------------------------------------------------------------------------------------------------------------------------------------------------------------------------------------------------------------------------------------------------------------------------------------------------------------------------------------------------------------------------------------------------------------------------------------------------------------------------------------------------------|
| Journal:                      | <i>BMJ Open</i>                                                                                                                                                                                                                                                                                                                                                                                                                                                                                                                                                                                                                                                                                                                                                                                                                                                                                                                                                                                                                                                                                                                                                                                                                                                                                                                                                                                                                                                                                                                                                                                                                                                                                                                                                                                                                                                                                                                                                                                                                                                                                                                                                                                                                                                                                                  |
| Manuscript ID                 | bmjopen-2021-049606.R1                                                                                                                                                                                                                                                                                                                                                                                                                                                                                                                                                                                                                                                                                                                                                                                                                                                                                                                                                                                                                                                                                                                                                                                                                                                                                                                                                                                                                                                                                                                                                                                                                                                                                                                                                                                                                                                                                                                                                                                                                                                                                                                                                                                                                                                                                           |
| Article Type:                 | Protocol                                                                                                                                                                                                                                                                                                                                                                                                                                                                                                                                                                                                                                                                                                                                                                                                                                                                                                                                                                                                                                                                                                                                                                                                                                                                                                                                                                                                                                                                                                                                                                                                                                                                                                                                                                                                                                                                                                                                                                                                                                                                                                                                                                                                                                                                                                         |
| Date Submitted by the Author: | 31-Aug-2021                                                                                                                                                                                                                                                                                                                                                                                                                                                                                                                                                                                                                                                                                                                                                                                                                                                                                                                                                                                                                                                                                                                                                                                                                                                                                                                                                                                                                                                                                                                                                                                                                                                                                                                                                                                                                                                                                                                                                                                                                                                                                                                                                                                                                                                                                                      |
| Complete List of Authors:     | <p>Skjøt-Arkil, Helene; University Hospital of Southern Denmark, The Emergency Department; University of Southern Denmark Faculty of Health Sciences, Department of Regional Health Research<br/> Heltborg, Anne; University Hospital of Southern Denmark, The Emergency Department; University of Southern Denmark Faculty of Health Sciences, Department of Regional Health Research<br/> Lorentzen, Morten; University Hospital of Southern Denmark, The Emergency Department; University of Southern Denmark Faculty of Health Sciences, Department of Regional Health Research<br/> Cartuliales, Mariana; University Hospital of Southern Denmark, The Emergency Department; University of Southern Denmark Faculty of Health Sciences, Department of Regional Health Research<br/> Hertz, Mathias Amdi; Odense University Hospital, Department of Infectious Diseases; University of Southern Denmark Faculty of Health Sciences, Department of Clinical Research<br/> Graumann, Ole; Odense University Hospital, Department of Radiology; University of Southern Denmark Faculty of Health Sciences, Institute for Clinical Research<br/> Rosenvinge, Flemming; Odense University Hospital, Department of Clinical Microbiology<br/> Petersen, Eva; University Hospital of Southern Denmark, Blood samples, Biochemistry and Immunology<br/> Østergaard, Claus; University Hospital of Southern Denmark, Department of Clinical Microbiology<br/> Laursen, Christian; Odense University Hospital, Department of Respiratory Medicine; University of Southern Denmark Faculty of Health Sciences, Department of Clinical Research<br/> Skovsted, Thor; University Hospital of Southern Denmark, Blood sample, Biochemistry and Immunology<br/> Posth, Stefan; University of Southern Denmark Faculty of Health Sciences, Department of Clinical Research; Odense University Hospital, Emergency Department<br/> Chen, Ming; University Hospital of Southern Denmark, Department of Clinical Microbiology; University of Southern Denmark Faculty of Health Sciences, Department of Regional Health Research<br/> Mogensen, Christian; University Hospital of Southern Denmark, Emergency Department; University of Southern Denmark Faculty of Health Sciences, Department of Regional Health Research</p> |

1  
2  
3  
4  
5  
6  
7  
8  
9  
10  
11  
12  
13  
14  
15  
16  
17  
18  
19  
20  
21  
22  
23  
24  
25  
26  
27  
28  
29  
30  
31  
32  
33  
34  
35  
36  
37  
38  
39  
40  
41  
42  
43  
44  
45  
46  
47  
48  
49  
50  
51  
52  
53  
54  
55  
56  
57  
58  
59  
60

|                                  |                                                                                                                                                                                                                     |
|----------------------------------|---------------------------------------------------------------------------------------------------------------------------------------------------------------------------------------------------------------------|
| <b>Primary Subject Heading</b> : | Infectious diseases                                                                                                                                                                                                 |
| Secondary Subject Heading:       | Diagnostics, Emergency medicine, Epidemiology, Infectious diseases, Radiology and imaging                                                                                                                           |
| Keywords:                        | Diagnostic microbiology < INFECTIOUS DISEASES, MICROBIOLOGY, Computed tomography < RADIOLOGY & IMAGING, Diagnostic radiology < RADIOLOGY & IMAGING, Ultrasound < RADIOLOGY & IMAGING, ACCIDENT & EMERGENCY MEDICINE |
|                                  |                                                                                                                                                                                                                     |

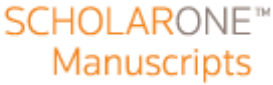



I, the Submitting Author has the right to grant and does grant on behalf of all authors of the Work (as defined in the below author licence), an exclusive licence and/or a non-exclusive licence for contributions from authors who are: i) UK Crown employees; ii) where BMJ has agreed a CC-BY licence shall apply, and/or iii) in accordance with the terms applicable for US Federal Government officers or employees acting as part of their official duties; on a worldwide, perpetual, irrevocable, royalty-free basis to BMJ Publishing Group Ltd ("BMJ") its licensees and where the relevant Journal is co-owned by BMJ to the co-owners of the Journal, to publish the Work in this journal and any other BMJ products and to exploit all rights, as set out in our [licence](#).

The Submitting Author accepts and understands that any supply made under these terms is made by BMJ to the Submitting Author unless you are acting as an employee on behalf of your employer or a postgraduate student of an affiliated institution which is paying any applicable article publishing charge ("APC") for Open Access articles. Where the Submitting Author wishes to make the Work available on an Open Access basis (and intends to pay the relevant APC), the terms of reuse of such Open Access shall be governed by a Creative Commons licence – details of these licences and which [Creative Commons](#) licence will apply to this Work are set out in our licence referred to above.

Other than as permitted in any relevant BMJ Author's Self Archiving Policies, I confirm this Work has not been accepted for publication elsewhere, is not being considered for publication elsewhere and does not duplicate material already published. I confirm all authors consent to publication of this Work and authorise the granting of this licence.



1

2  
3  
4  
5  
6  
7  
8  
9  
10  
11  
12  
13  
14  
15  
16  
17  
18  
19  
20  
21  
22  
23  
24  
25  
26  
27  
28  
29  
30  
31  
32  
33  
34  
35  
36  
37  
38  
39  
40  
41  
42  
43  
44  
45  
46  
47  
48  
49  
50  
51  
52  
53  
54  
55  
56  
57  
58  
59  
60

# Improved diagnostics of infectious diseases in Emergency Departments

## – a protocol of a multifaceted multicenter diagnostic study

Short title: Improved diagnostics of infectious diseases

Helene Skjøt-Arkil<sup>1,2\*</sup>, Anne Heltborg<sup>3</sup>, Morten Hjarnø Lorentzen<sup>1,2</sup>, Mariana Bichuette Cartuliales<sup>1,2</sup>, Mathias Amdi Hertz<sup>4</sup>, Ole Graumann<sup>5,6</sup>, Flemming Schønning Rosenvinge<sup>7</sup>, Eva Rabing Brix Petersen<sup>8</sup>, Claus Østergaard<sup>9</sup>, Christian B. Laursen<sup>6,10</sup>, Thor Aage Skovsted<sup>8</sup>, Stefan Posth<sup>6,11</sup>, Ming Chen<sup>12</sup>, Christian Backer Mogensen<sup>1,2</sup>

### *Affiliations*

1: Emergency Department, University Hospital of Southern Denmark, Aabenraa, Denmark

2: Department of Regional Health Research, University of Southern Denmark, Aabenraa, Denmark

3: Medical Department, University Hospital of Southern Denmark, Sønderborg, Denmark

4: Department of Infectious Diseases, Odense University Hospital, Odense, Denmark

5: Radiology Department, Odense University Hospital, Odense, Denmark

6: Department of Clinical Research, University of Southern Denmark, Odense, Denmark

7: Department of Clinical Microbiology, Odense University Hospital, Odense, Denmark

8: Bloodsamples, Biochemistry and Immunology, University Hospital of Southern Denmark, Aabenraa, Denmark

9: Department of Clinical Microbiology, Lillebælt Hospital, Vejle, Denmark

10: Department of Respiratory Medicine, Odense University Hospital, Odense, Denmark

11: Emergency Department, Odense University Hospital, Odense, Denmark

12: Department of Microbiology, University Hospital of Southern Denmark, Aabenraa, Denmark

\*Corresponding author: Emergency Department, University Hospital of Southern Denmark, Kresten Philipsensvej 15, 6200 Aabenraa, Denmark; Email: Helene.skjoet-arkil@rsyd.dk

Word count: 4.446

2

## Abstract

**Background:** The major obstacle in prescribing an appropriate and targeted antibiotic treatment is insufficient knowledge concerning *whether* the patient has a bacterial infection, *where* the focus of infection is and *which* bacteria are the agents of the infection. A prerequisite for the appropriate use of antibiotics is timely access to accurate diagnostics such as point-of-care (POC) testing.

The study aims to evaluate diagnostic tools and working methods that support a prompt and accurate diagnosis of hospitalized patients suspected of an acute infection. We will focus on the most common acute infections; community-acquired pneumonia (CAP) and acute pyelonephritis (APN). The objectives are to investigate 1) patient characteristics and treatment trajectory of the different acute infections, 2) diagnostic and prognostic accuracy of infection markers, 3) diagnostic accuracy of POC urine flow cytometry on diagnosing and excluding bacteriuria, 4) how effective the addition of POC analysis of sputum to the diagnostic set-up for CAP is on antibiotic prescriptions, 5) diagnostic accuracy of POC ultrasound and ultralow dose (ULD) Computed Tomography (CT) on diagnosing CAP, 6) diagnostic accuracy of specialist ultrasound on diagnosing APN, 7) diagnostic accuracy of POC ultrasound in diagnosing hydronephrosis in patients suspected of APN.

**Methods and analysis:** It is a multifaceted multicenter diagnostic study, including 1000 adults admitted with suspicion of an acute infection. Participants will within the first 24 hours of admission undergo additional diagnostic tests including infection markers, POC urine flow cytometry, POC analysis of sputum, POC and specialist ultrasound, and ultralow dose CT. The primary reference standard is an assigned diagnosis determined by a panel of experts.

**Ethics, dissemination and registration:** Approved by Regional Committees on Health Research Ethics for Southern Denmark, Danish Data Protection Agency, and clinicaltrials.gov. Results will be presented in ten peer-reviewed journals, and positive, negative and inconclusive results will be published.

**Key words:** Acute Infection, antibiotics, diagnostic, pneumonia, pyelonephritis, sputum, point-of-care-test, ultrasound, infection marker, Ultralow dose Computed Tomography

### Strengths and limitations of the study:

- It is a pragmatic study that reflects reality and has potential for substantial clinical significance
- The study combines diagnostics and knowledge from five different medical specialties
- The study is complex and contains a number of sub-studies which share the same population
- The study is only generalizable to settings with a similar technological context and trained staff
- COVID-19 and the consequent societal lockdown might affect patient distribution

3

## World Health Organization Trial Registration Data Set

**Primary Registry and Trial Identifying Number:** ClinicalTrials.gov: NCT: 04661085, 04681963, 04667195, 04652167, 04686318, 04686292, 04651712, 04645030, and 04651244.

**Date of Registration in Primary Registry:** December 2020

**Secondary Identifying Numbers:** Regional Committees on Health Research Ethics for Southern Denmark (S-20200188), and Danish Data Protection Agency (20/60508)

**Source(s) of Monetary or Material Support:** University Hospital of Southern Denmark and University of Southern Denmark, Aabenraa, Denmark

**Primary Sponsor:** Professor Christian Backer Mogensen, University Hospital of Southern Denmark and University of Southern Denmark, Aabenraa, Denmark

**Secondary Sponsor(s):** Associate professor Helene Skjøt-Arkil, University Hospital of Southern Denmark and University of Southern Denmark, Aabenraa, Denmark

**Contact for Public Queries:** University Hospital of Southern Denmark, Kresten Philipsens vej 15, 6200 Aabenraa, Denmark, tlf: +45 79970000, e-mail: Akutforskning.SHS@rsyd.dk

**Contact for Scientific Queries:** Professor Christian Backer Mogensen, Emergency Department, Hospital Sønderjylland, Kresten Philipsensvej 15, 6200 Aabenraa, Denmark. Email: Christian.Backer.Mogensen@rsyd.dk. Phone: 0045 7997000

**Public Title:** Improved diagnostics of acute infectious diseases

**Scientific Title:** Improved diagnostics of infectious diseases in Emergency Departments

**Countries of Recruitment:** Denmark

**Health Condition(s) or Problem(s) Studied:** Infectious diseases including community-acquired pneumonia and acute pyelonephritis

### Intervention(s):

Sub-study 2: Index test: infection markers (serum procalcitonin, and soluble urokinase plasminogen activator receptor

Sub-study 3: Index test: point-of-care urinary flow cytometry

Sub-study 4: Intervention: Point-of-care tool providing rapid microbiological results on sputum samples based on polymerase chain reaction. Control: routine microbiology analysis

Sub-study 5: Index test: Ultralow dose computed tomography scans / ultrasound scanning

Sub-study 6: Index test: Contrast enhanced ultrasound

Sub-study 7: Index test: Ultrasound scanning

**Key Inclusion and Exclusion Criteria:** Adults admitted to the Emergency Department are invited if receiving physician suspects the patient has an infection. Patients are excluded if participating will delay a life-saving treatment, if they have been admitted within 14 days, if pregnant, or if having severe immunodeficiency.

4

**Study Type:** It is a multifaceted multicenter study, primarily diagnostic accuracy set of studies but a randomised controlled trial of sputum diagnostics embedded within it. It has been divided into seven-substudies.

Sub-study 1: Observational, descriptive study

Sub-study 2, 3, 5, 6, 7: Observational, diagnostic accuracy studies

Sub-study 4: Eksperimental, randomized controlled trial - parallel assigned, allocated 1:1 according to a computer-generated randomization schedule.

**Date of First Enrollment:** February 1<sup>st</sup> 2021

#### **Sample Size**

Sample Size consists of: 200 patients diagnosed with CAP and 150 patients with APN

Number of participants that the trial plans to enrol in total: 1000

Number of participants that the trial has enrolled: 460

**Recruitment Status:** Recruiting: participants are currently being recruited and enrolled

#### **Primary Outcome(s):**

Outcome sub-study 1: Diagnosis of community acquired pneumonia and acute pyelonephritis

Method of measurement: Expert panel consisting of emergency and infectious disease specialists (reference standard)

Timepoint: within seven days after admission

Outcome sub-study 2: Diagnosis of community acquired pneumonia and acute pyelonephritis

Method of measurement: Expert panel consisting of emergency and infectious disease specialists (reference standard)

Timepoint: within seven days after admission

Outcome sub-study 3: bacteriuria

Method of measurement: urine culturing specialists (reference standard)

Timepoint: Time of admission

Outcome sub-study: Type of prescribed antibiotic

Method of measurement: Medical record audit

Timepoint: 4 hours

Outcome sub-study 5: Diagnosis of community acquired pneumonia

Method of measurement: high-resolution computed tomography specialists (reference standard)

Timepoint: within 24 hours of admission

Outcome sub-study 6: Diagnosis of acute pyelonephritis

Method of measurement: magnetic resonance imaging specialists (reference standard)

Timepoint: within 24 hours of admission

Outcome sub-study 7: Diagnosis of acute pyelonephritis

Method of measurement: magnetic resonance imaging specialists (reference standard)

Timepoint: within 24 hours of admission

5

**Key Secondary Outcomes:** Length of stay (medical record audit), Mortality (medical record audit and Danish National Patient Register, 30 days, 90 days, and inhospital mortality), Readmission to hospital within 30 days from day of discharge (medical record audit), Admission to intensive care (medical record audit), Antibiotic treatment at 48 hours of admission (medical record audit).

**Ethics Review:** The study was approved by the Regional Committees on Health Research Ethics for Southern Denmark (S-20200188) on January 7<sup>th</sup> 2021. Contact: Komite@rsyd.dk

**Completion date:** The last patient is expected to be included in February 2022. The final data is expected to be collected in June 2022.

**IPD sharing statement:** The datasets used and/or analysed during the current study are available from the corresponding author on reasonable request

6

## Introduction

### *Antibiotic resistance*

Multi-resistant bacteria is one of the major threats to the public health(1). The incidence of multi-resistant bacteria is increasing in Denmark(2) and every 20th patient admitted to a Danish Emergency Department (ED) is colonized with multi-resistant bacteria(3). Denmark has focused on this challenge(4) by screening special patient groups for multi-resistant bacteria(5, 6), and by initiating campaigns to reduce antibiotic consumption - mainly the use of broad-spectrum antibiotics in hospitals(4, 7).

The Danish Ministry of Health has made extensive efforts targeting the use of antibiotics in hospitals. However, the major obstacle in reducing the prescription of broad-spectrum antibiotics is insufficient knowledge concerning *whether* the patient has a bacterial infection, *where* the focus of infection is and *which* bacteria are the agents of the infection(8). Uncertainty in the answers to these three questions often leads a clinician to choose a broad-spectrum antibiotic at the onset of treatment. Unfortunately, the prescription of a broad-spectrum antibiotic is rarely revised when laboratory results are available, often because the patient already has been discharged(9).

### *Acute infections and diagnostic tools*

A prerequisite for appropriate use of antibiotics is timely access to accurate diagnostic tests, since treatment of acute infections should be initiated within a few hours to avoid serious complications such as bacteremia, sepsis, organ failure, septic shock and death(10). The most common conditions among ED patients with suspected infections are community acquired pneumonia (CAP) and acute pyelonephritis (APN)(11, 12). Diagnosing CAP and APN can be challenging as symptoms are often weak and nonspecific and the current methods for focal and etiological diagnosis have low sensitivity and specificity and often deliver results after the decision regarding antibiotic treatment has been made(9, 13, 14).

The Coronavirus Disease 2019 (COVID-19) pandemic has highlighted the need of accurate diagnostic tests. Quick and correct classification of pneumonia as COVID-19, another viral or bacterial pneumonia, or even COVID-19 complicated with bacterial pneumonia, is of vital importance to select the correct treatment (including antibiotics), and the correct infection control measures, including isolation.

In order to make the correct diagnosis and prescribe an appropriate and targeted treatment within a few hours of admission, it is important to the physician to be able to answer the following three questions: a) Is it an infection that requires antibiotic treatment (*infection marker*)? b) Where is the focus of infection (imaging *diagnosis*)? c) Which bacteria should the prescribed antibiotic target (*etiologic diagnosis*)?

### **Bacterial infection markers**

To support the diagnosis of an infection and assess its severity, a measure of the systemic inflammatory response is useful e.g. abnormal temperature, elevated leucocyte count with neutrocytosis, or elevated C-reactive protein (CRP). Some uncertainty is associated with CRP because it has a delayed response to bacterial infection and often is elevated in non-infectious inflammatory conditions(15). A more sensitive and specific marker that can differentiate between bacterial and viral infection and reflect the severity of the infection is desired(16). Serum procalcitonin (PCT) has potential as a diagnostic tool in suspected bacterial infections(17) and can distinguish between viral and bacterial pneumonias(18). Soluble urokinase plasminogen activator receptor (suPAR) might have a potential as a marker for acute bacterial infections requiring antibiotic treatment(19). However, there are no well-conducted studies which compare simultaneously all three biomarkers diagnostic abilities for bacterial infections in general or in relation to CAP or APN (16, 20).

### **Imaging diagnostics**

7

1  
2 The CAP diagnosis is primarily based on clinical symptoms and findings, supplemented with chest X-ray, which has a  
3 low sensitivity and specificity (21). Identifying an improved imaging alternative with high diagnostic sensitivity and  
4 specificity and minimal risk to the patient is imperative. Computed Tomography scans (CT), e.g. high-resolution CT  
5 (HRCT) provides a detailed diagnosis of thoracic diseases, but the radiation dose is high and potentially harmful. Low-  
6 dose CT has shown promising diagnostic results, but the radiation dose is still potentially harmful (22). Ultralow dose  
7 CT (ULDCT) of the thorax could be an alternative, but has yet to be studied within an ED context. Another relevant  
8 imaging modality is ultrasound scanning (US). US of the lungs is useful to diagnose pulmonary edema and pleural  
9 effusion, but the value of US performed by a novice operator when diagnosing CAP in an ED setting needs further  
10 investigation(23).

11  
12  
13  
14  
15 Currently, no imaging methods are used to verify the diagnosis of APN. The diagnosis is primarily based on unspecific  
16 clinical findings (24), and is often not confirmed microbiologically (25). Complicating factors such as hydronephrosis  
17 and renal abscess can be visualized with conventional US (26). Contrast enhanced US (CEUS) seems to be a promising  
18 diagnostic imaging modality of acute renal inflammation (27, 28). The value and suitability in a clinical setting of this  
19 more advanced US investigation is unknown.

### 20 21 22 **Etiological diagnostics**

23 Sputum can be cultivated to determine the agent of CAP. However, results are often unspecific and not available  
24 until after discharge of the patient or completion of treatment(9). A point-of-care (POC) tool providing rapid  
25 microbiological results on e.g. sputum samples would therefore be useful. Systems are available today based on  
26 polymerase chain reaction (PCR) methods with results available within one hour for a variety of viral and bacterial  
27 pathogens (29). The impact of such fast diagnostic systems on antibiotic prescriptions has not been investigated in  
28 an ED context.

29  
30  
31  
32 The diagnosis of APN is verified by significant bacteriuria in urine culture (25), but as many as half of the patients  
33 with clinical APN fails to meet this diagnostic criterion. Unfortunately, the time from sample to result for urine  
34 cultures is more than 24 hours (24, 25, 30, 31). Urine test strips are unreliable with low specificity and low predictive  
35 values(32). Therefore, a POC test is desired, which can provide rapid results and quickly identify a bacteriuria. One  
36 such tool may be urine flow cytometry (UFC), which has shown promising diagnostic value for the exclusion of  
37 bacteriuria with a high negative predictive value (33). However, better documentation for its use as an ED diagnostic  
38 screening method is needed.

### 39 40 41 **Aim and objectives**

42 Our broad hypothesis is that improved diagnostic strategies for patients in ED with suspicion of systemic infection  
43 can contribute to more rapid and accurate diagnosis. Thereby, we assume that a more appropriate antibiotic  
44 treatment can be administered to these patients.

45  
46  
47  
48 The project aims to evaluate alternative diagnostic tools and working methods that support a prompt and accurate  
49 diagnosis of hospitalized patients suspected of an acute infection. We will focus on the most common ED infections;  
50 CAP and APN. The research objectives are to answer the following questions:

- 51  
52 1) What are the patient characteristics and treatment trajectory of the different ED infections?
- 53 2) What is the diagnostic and prognostic accuracy of the infection markers suPAR, and CRP in patients with  
54 suspected CAP and APN?
- 55 3) What is the diagnostic accuracy of POC-UFC on diagnosing and excluding bacteriuria?
- 56 4) How effective is the addition of POC-PCR analysis of sputum to the diagnostic set-up for CAP on antibiotic  
57 prescribing?
- 58 5) What is the diagnostic accuracy of POC-US and ULDCT on diagnosing CAP?
- 59 6) What is the diagnostic accuracy of CEUS on diagnosing APN?
- 60



8

7) What is the diagnostic accuracy of POC-US in diagnosing hydronephrosis in patients suspected of APN?

The ultimate goal is to combine the results of all these seven objectives into a novel diagnostic model which the ED physician can apply when receiving a patient with suspicion of infection.

## Methods

### Study design

The study is designed as a multifaceted multicenter diagnostic study. Participants will undergo additional diagnostic tests depending on the primary suspected focus of infection.

The study protocol is reported in accordance with the SPIRIT (Standard protocol items: Recommendations for interventional trials) statement(34).

### Setting

The study will recruit participants from three Danish EDs: the regional Hospital, Lillebælt Hospital in Kolding, the regional Hospital, Hospital Sønderjylland in Aabenraa, and the University Hospital, Odense University Hospital in Odense. Enrolment commences from February 8<sup>th</sup> 2021 and continues until the predefined sample size has been reached.

Project assistants will recruit the participants and collect data. The project assistants will have a healthcare education (physicians, physiotherapists and medical students). They are certificated in focused US of kidney and lung (one-day POC-US course, 25 supervised scans, and Objective Structured Assessment of US Skills (OASUS) test) within one month from enrollment.

The study originates from the Emergency Research Unit affiliated at University Hospital of Southern Denmark and Department of Regional Health Research at University of Southern Denmark.

### Population and eligibility criteria

Inclusion of patients is based on the receiving ED physician's initial clinical assessment of the patient. Adults aged 18 or older admitted to the ED will be invited to participate in the study, if the receiving physician suspects the patient is having an infection. Only patients able to give informed consent will be invited. Depending on primary suspected focus of infection (CAP, APN or other/unknown), the patients will be included into one of three diagnostic tracks (A, B, or C) as shown in Figure 1.

Exclusion criteria that apply to all three tracks at time of recruitment

- If the attending physician considers that participation will delay a life-saving treatment or directly transfer to intensive care unit
- Admission (defined as >24 hours hospital visit) within the last 14 days to avoid hospital acquired infections
- Verified COVID-19 disease within 14 days before admission to avoid a skewed population consisting of COVID-19 patients instead of CAP patients. Patients suspected of COVID-19, at the time of recruitment, will not be excluded – nor if subsequently tested positive.
- Pregnant women, this to uniform all the studies. At the participating EDs the pregnant women represent a very small patient group, as they are admitted directly to the ward.
- Severe immunodeficiencies
  - o Primary immunodeficiencies
  - o Secondary immunodeficiencies



9

- Human immunodeficiency virus (HIV) positive, with a cluster of differentiation 4 (CD4) cell count <200
- Patients receiving immunosuppressive treatment (Anatomical therapeutic chemical (ATC) classification L04A)
- Corticosteroid treatment (>20 mg/day prednisone or equivalent for >14 days within the last 30 days)
- Chemotherapy within 30 days

Exclusion criteria that only apply to patients with suspected CAP (track A):

- Patients <40 years old are excluded from the ULDT and HRCT due to risk of cancer from radiation
- Patients <65 years who already participated once will be excluded from ULDT and HRCT due to risk of cancer from radiation

Exclusion criteria that only apply to patients with suspected APN (track B):

- Patients are excluded from magnetic resonance imaging (MRI) according to common MRI exclusion criteria (e.g. contraindicating metal in the body) and claustrophobia
- Patients with known allergy to US contrast

Figure 1 Design of patient flow and diagnostic tracks

## Recruitment

The study assistants will identify potential eligible patients through the local IT logistic system, which lists patients visiting the ED (Cetrea Anywhere®). According to the local guidelines, a medical clinical assessment of the patients is performed within half an hour from arrival at the ED(35). The study assistant will immediately after the assessment consult the receiving physician to ask if a) a systemic infection is suspected, and b) what the most likely focus is: lungs, urinary tract, elsewhere/unknown. If the patient meets the eligibility criteria, the study assistant will present the study both verbally and in writing, and invite the patient to participate in the study. The schedule of enrollment is illustrated in appendix III.

## Procedure

The study assistant will after obtained written consent order blood samples, urine sample, and the diagnostic tests described in the assigned track. The study assistant will collect data for patient characteristic by looking in the patient record and by patient interview.

## Infection markers

Blood samples will be collected by a medical laboratory technologist and transferred to the local laboratory for analysis of CRP (routine analysis), PCT and suPAR. Laboratory staff will be blinded to participant diagnosis and outcome. PCT results will be available to the treating physician, but the suPAR result will not be available. CRP will be measured using an immunoturbidimetric assay (Tina-quant®, Roche) on Roche/Hitachi Cobas® systems. Plasma PCT will be quantified by an automated sandwich immunoassay "ECLIA" (Elecsys®, BRAHMS PCT-analyses) on Cobas® within two hours from collection according to standard procedure. Plasma suPAR will be quantified by using the commercial available suPARnostic® Tubilatex assay reagents (ViroGates, Denmark) on Cobas® as previously validated (36). Separated plasma is kept refrigerated and analysed for suPAR within 48 hours after collection.

## POC-UFC

10

1  
2 A urine sample will be collected according to routine procedure by the study assistant. The sample will be divided  
3 into three aliquots; one for routine urine culturing, one for routine dipstick analysis and one half for POC-UFC  
4 analysis (UF-5000, Sysmex, Kobe, Japan). The POC-UFC analysis will be performed according to manufacturer's  
5 instruction and conducted by study assistants or laboratory staff in a point-of-care laboratory close to the  
6 department to which the transport time is less than 10 minutes. Laboratory staff will be blinded to participant  
7 diagnosis and outcome. The results of the POC-UFC analysis will not be visible to the treating physician.  
8  
9

10  
11 The results of the dipstick analysis and the urine culturing will be available to the treating physician as part of the  
12 usual procedure (within one hour for dipstick and after up to several days for culturing).  
13

#### 14 **POC-PCR sputum analysis**

15 A sputum sample will be collected according to standard procedure as soon as possible after recruitment by the  
16 study assistant. This sample will be randomly assigned to one of two groups with 1:1 allocation: 1) POC-PCR analysis  
17 (Biofire® FilmArray® Pneumonia Panel plus, Biomérieux, Marcy l'Etoile, France) in accordance with manufacturer's  
18 instruction(37), and 2) Routine microbiology analysis (culturing and PCR). Expecterated sputum or tracheal  
19 secretions will be used for the PCR analysis. All sputum samples will be cultured. Gram stain and microscopy are not  
20 included in the analysis  
21

22  
23 The randomization will be performed by the study assistants and generated electronically using Research Electronic  
24 Data Capture (RedCap) Randomization Module (38) with permuting blocks and stratified according to sites. Allocation  
25 concealment is ensured, as randomization is performed electronically and the study assistants administering the  
26 randomization will not have access to the randomization code. The allocation is revealed after consent is obtained  
27 and sputum collection successful.  
28

29  
30 The study assistants or laboratory staff will perform the POC-PCR analysis in a point-of-care laboratory at the ED or  
31 close to the department to which the transport time is less than 10 minutes. The used POC-PCR targets 27 of the  
32 most common pathogens involved in lower respiratory tract infections (appendix IV). The result of the POC-PCR will  
33 be presented by the study assistant to the treating physician within four hours upon admission. The treating  
34 physician will along with the result receive a recommended action list (appendix V), developed by microbiologists.  
35

36 The patients will be blinded, and the investigator will be blinded to data management and analysis. Outcome  
37 adjudicators will not be blinded.  
38

#### 39 **POC-US**

40  
41 A POC-US (Butterfly iQ+, GM Medical) of the lungs will be performed bedside as Focused Lung US (FLUS) by study  
42 assistant within 24 hours after admission. FLUS is used to diagnose pneumothorax, pleural effusion and interstitial  
43 syndrome. Additionally, signs of pneumonia ie., liver like alveolar consolidation with shredded borders and air  
44 bronchograms will be described. Diagnostic criteria used are in accordance with international consensus(39, 40).  
45 FLUS will be conducted immediately before or after the CT scans. The FLUS result will not be available to the treating  
46 physician unless the result requires immediate action (pneumothorax or large pleural effusions).  
47

48  
49 A POC-US (Butterfly iQ+) of the kidneys will be conducted bedside by a study assistant within 24 hours after  
50 admission in order to assess whether hydronephrosis is present or absent. If present, the condition will be graded in  
51 grades 1, 2, 3 or 4(41). The result will not be available to the treating physician since the patient is examined by a  
52 radiologist immediately after, and the results from this examination is reported to the clinician according to standard  
53 care.  
54

#### 55 **ULDCT and HRCT**

56  
57 The ULDCT and HRCT of the thorax scans are performed in the same scanning sequence, thus on the same scanner. A  
58 specially designed technical protocol is the basis of the ULDCT and will prior to inclusion through a minor pilot study  
59 be optimized at each site of inclusion to ensure uniform quality and dose. The radiological findings from ULDCT will  
60 be reported systematically using standardized assessment templates by radiologists. The HRCT will be performed

11

1  
2 according to standard protocols at each hospital, but only during inspiration to limit radiation dose. HRCT will be  
3 reference standard for FLUS and ULDCT and interpreted by lung expert radiologists. The reports from POC-US,  
4 ULDCT, and HRCT respectively will be blinded. Study consultant radiologists with experience from ED patients will  
5 post-process report the ULDCT scans systematically using specially developed research report templates. The results  
6 of ULDCT and HRCT will be available to the treating physician within a week. If a result requires immediate action,  
7 the clinician will be contacted directly by the examiner (pneumothorax and large pleural effusions), according to  
8 standard care. If a participant is discharged before the scans have been performed, they will be offered the scan in  
9 an outpatient setting.

### 13 **CEUS and MRI**

14 A specialist US will be performed at the Radiology Department, including conventional grayscale US and CEUS with  
15 intravenous injection of 1.5 mL ultrasound contrast (Sonovue®, Bracco). At the same time, or as close as possible, a  
16 MRI without intravenous contrast of the kidneys will be conducted. The MRI will include the following sequences:  
17 planning, Dixon, T1 mapping, T2, T2 mapping, Diffusion ADC (100, 400, 800), MRI angio (3D VIBE), and Phase  
18 Contrast. The radiological findings will be described systematically using standardized assessment templates. The  
19 report from US and MRI respectively will be blinded. A renal expert radiologist will interpret the MRI and will post-  
20 process report the imaging systematically using specially developed research report templates. Imaging from the  
21 CEUS will be evaluated in an external postprocessing software algorithm (Vuebox, Bracco). The non-experimental  
22 results of the scans will be available to the treating physician within a week. If a result requires immediate action  
23 (suspicion of pyonephrosis or renal abscess), the clinician will be contacted directly by the examiner, according to  
24 standard care. If a participant is discharged before the scans have been performed, they will be offered the scans in  
25 an outpatient setting.

### 31 **Expert panel reference standard**

32 Unless otherwise stated, the reference standard is the assigned diagnosis determined by a panel of experts. The  
33 panel consists of two consultants: a specialist in emergency medicine and a specialist in infectious medicine with  
34 considerable experience within acute infections. They will determine the final diagnosis based on all relevant  
35 information in medical records and study database available from the admission including routine blood analysis,  
36 blood/urine/sputum culturing, POC-PCR, routine and study imaging (including HRCT and MRI), and clinical  
37 information. The final diagnosis will be based on information available within the first week after admission. A  
38 standardized template in RedCap will be used (appendix VI), and the experts will register if the patient has an  
39 infectious disease, if the focus of infection is the lungs, kidneys or other, and specify the infection by adding an ICD-  
40 10 diagnosis code. If the patient has two focal diagnoses e.g. pneumonia and APN, the assessment will be based on  
41 what is the most probable cause of infection on admission. Conflicts will be discussed until consensus is reached. In  
42 this study we define APN as a urinary tract infection with typical local symptoms and systemic affection (i.e. fever,  
43 sepsis), thus indicating ascension of infection above the bladder.

### 49 **Data collection and management**

50 All data will be collected in RedCap. Data will be pseudoanonymized and managed and analyzed using STATA or R in  
51 collaboration with a biostatistician

52  
53 For each participant information on pre-defined clinical parameters upon arrival will be obtained from the medical  
54 record including symptoms, lifestyle factors signs, disease severity, vital parameters, triage at arrival, comorbidities,  
55 functional status, resident status, prior antibiotics prescriptions, and medical history.

56  
57 Other variables from the medical record that will be registered are length of stay, re-admission, admission to  
58 intensive care unit, prescribed antibiotic treatment, in-hospital mortality, 30-days and 90-days mortality, *Clostridium*  
59 *difficile* infections, and chest X-ray.

12

### **Data monitoring**

The daily inclusion of participants will be monitored by the steering committee and the numbers of inclusion will be communicated every week to emailed to the included centers. The primary analysis of data will be performed by the project assistants after the last patient has been included and all analysis performed. The results will be discussed and evaluated first in the steering committee and afterwards with all the included departments.

### **Process auditing**

During data collection, an external assessor will supervise the performance of all project assistants and an independent radiology expert will ensure data quality. Intraobservability on POC-US will be performed each month.

Overall risk for the participants in the randomized trial (POC-PCR sputum analysis) is minimal, as sputum collection is part of the standard care, and it will not affect the following diagnostic work-up. However the POC-PCR results may inform the clinician in a favorable way before onset of patient treatment. Any protocol deviation and/or unknown/unexpected adverse event, will be reported in RedCap, evaluated continuously by the steering committee, and reported to the treating physician and patient.

## **Statistical analysis and plan**

According to the objectives, the study has been divided into sub-studies and for each the primary and secondary outcomes, statistical analysis, and sample size is presented.

### **Objective 1 - Patient characteristics and treatment trajectory**

This sub-study will include all participant. Patient characteristics associated to verified diagnosis will be presented with descriptive results, and logistic univariate and multivariate analysis will be carried out for selected risk indicators, including confounders in the final analysis. The primary outcome is the diagnosis of CAP and APN (determined by the expert panel reference standard). Secondary outcomes are length of stay, 30 days mortality, in-hospital mortality, admission to intensive care unit, readmission to hospital within 30 days from day of discharge.

At least 10 variables have to be analyzed, so at least 150 patients with a particular verified diagnosis are needed (50+10 events/variable).

### **Objective 2 - Diagnostic and prognostic accuracy of PCT and suPAR**

This diagnostic accuracy study will include all participants. Index tests are the concentration of CRP, PCT, and suPAR. The expert panel is the reference standard. Diagnostic accuracy tests will be performed as primary analysis, where the test positive of the reference standard is the diagnosis of CAP, and of urinary tract infection. Secondary prognostic tests will be performed, using the reference standard of 30 and 90 days mortality, in-hospital mortality, admission to intensive care, readmission to hospital within 30 days from day of discharge, and length of stay (LOS).

The test positively cut-offs of the index tests will be determined exploratory by performing Youden index analysis to estimate the best cut-off. The CRP value will be available for the members of the expert panel, but the PCT and suPAR will not be available. The reference standard results will not be available for the index test performers.

A demographic characteristic of the study populations will be presented, and the time interval of the laboratory analysis of the biomarkers will be reported. Cross-tabulation of the index test results by the reference standard results will be made including missing results, and used to determine diagnostic and prognostic accuracy expressed as sensitivity, specificity, predictive values, and likelihood ratios reported with 95% confidence intervals where appropriate. Receiver operating characteristic (ROC) analysis will be performed. Statistical modelling will also be

13

performed to explore the effect of combining tests on diagnostic accuracy in order to identify the most accurate diagnostic strategy.

The study is designed to be able to find a difference in area under the curve (AUC) from 0.7 to 0.8 between two tests, which requires 200 verified CAP cases and 200 controls (power 0.8, alpha 0.05, AUC below 0 hypothesis 0.7) and 150 verified pyelonephritis cases and 150 controls (power 0.8, alpha 0.05, AUC below 0-hypothesis 0.6) (42).

### **Objective 3 - Diagnostic accuracy of POC-UFC on diagnosing and excluding bacteriuria**

This diagnostic accuracy study will include all participants. Index test is the POC-UFC and reference standard is the urine culture. The primary outcome is bacteriuria, defined as significant growth of any bacteria. A urine culture will be considered positive with a cut-off of > 1000 CFU/ml for uropathogens and >10.000 CFU/ml for others.

A secondary diagnostic test will be performed, where the reference standard is the expert panel assessment. The outcome is urinary tract infection. The test positive of the index test is bacteraemia combined with leukocytes.

The index test results will not be available for the performers of the reference standard test. The reference standard results will be available after the index test has been performed.

A demographic characteristic of the study populations will be presented. Cross-tabulation of the index test result by the reference standard results will be made including missing results, and used to determine diagnostic accuracy expressed as sensitivity, specificity, predictive values, and likelihood ratios reported with 95% confidence intervals where appropriate. Receiver operating characteristic (ROC) analysis will also be performed.

Urine culture shows significant growth of uropathogenic bacterium in approximately 50% of people with suspected APN(25). Asymptomatic bacteriuria accounts for about 20% in the elderly population, depending on gender and age (43), which among 1000 inpatients suspected of infection, of which 15% have APN, gives a sensitivity of 50% (95% CI: 42-58 %) and a negative predictive value of 90% (95% CI: 77-83%). With the expectation of identifying at least 150 cases of APN among our study population, an improvement in sensitivity to 70% (95% CI: 62-77%) and negative predictive value to 95% (95% CI: 93 -96%) could be found with 95% security.

### **Objective 4 – Addition of POC-PCR analysis of sputum to the diagnostic set-up for CAP on antibiotic prescribing**

This RCT will include all participants in track A, who had a sputum sample collected. Intervention group: sputum samples analysed by POC-PCR. Control group: routine microbiology analysis. It is a superiority randomized trial. Primary outcome is targeted versus non-targeted antibiotic treatment prescribed at four hours after admission. Targeted treatment is defined as narrow spectrum antibiotics directed against CAP, antibiotics directed against a detected respiratory pathogen or no antibiotics (e.g. in the absence of a bacterial pathogen and/or presence of a viral pathogen) (appendix VII). Non-targeted treatment is defined as broad spectrum antibiotics not directed against a specific pathogen or antibiotics not directed against CAP. The analyses will follow the intention-to-treat principal and a hierarchical mixed effect logistic model will be utilized to analyze the primary outcome to accommodate the hierarchical structure of the random effect, which manifest according to different personnel collecting the samples and geographical variation.

Secondary outcomes are length of stay, 30 days mortality, in-hospital mortality, admission to intensive care unit, readmission to hospital within 30 days from day of discharge, and antibiotic treatment at 48 hours of admission. A reliability analysis for POC-PCR and routine culturing will be performed as secondary analysis calculating the Intra-class correlation coefficient

To achieve a power of 82% for the main analysis, 200 patients with suspected CAP must be included. To accommodate the bias presented by Gail et al (44) the generalized mixed effect models will be adjusted for strong



14

1  
2 predictors. If the sample size is not sufficient for a generalized mixed effect models the corresponding univariate  
3 analysis will be conducted.  
4

#### 5 **Objective 5 - Diagnostic accuracy of POC-US and ULDCT on diagnosing CAP**

7  
8 This diagnostic accuracy study will include all participants in track A, who had the HRCT performed. Index test is the  
9 POC-US, ULDCT, and chest x-ray. The reference standard is HRCT. The primary outcome is inflammatory changes in  
10 the lungs compatible with CAP.  
11

12 The index test results will not be available for the performers of the reference standard test. The reference standard  
13 results will be available after the index test has been performed.  
14

15  
16 A demographic characteristic of the study populations will be presented. Cross-tabulation of the index tests result by  
17 the reference standard results will be made including missing results, and used to determine diagnostic accuracy  
18 expressed as sensitivity, specificity, predictive values, and likelihood ratios reported with 95% confidence intervals  
19 where appropriate. Receiver operating characteristic (ROC) analysis will also be performed.  
20

21  
22 It is assumed that the reference standard will find 98% of the patients and index test 90%. With a power of 80%, at  
23 least 132 patients with verified CAP should be included (one-sided McNemar test).  
24

#### 25 **Objective 6 - Diagnostic accuracy of CEUS on diagnosing APN**

26  
27 This diagnostic accuracy study will include all participants in track B, who had both the CEUS and MRI performed.  
28 Index test is the CEUS and reference standard is MRI. The primary outcome is the presence of renal inflammatory  
29 changes compatible with APN. The reference standard will be described by an expert radiologist, who before  
30 describing will be informed of some standardized clinical and paraclinical parameters (e.g. fever, CRP, flank pain, and  
31 relevant comorbidity), but will be blinded to the results of the other imaging investigations. The CEUS will be  
32 conducted and described by a consultant radiologist. The scans will be post process evaluated in the software  
33 VueBox. Each kidney is divided into an upper, middle and lower part for each, and these regions are compared in the  
34 evaluation of diagnostic agreement.  
35

36  
37 The index test results will not be available for reference standard performer and describer. The reference standard  
38 results will not be available for the index test performers.  
39

40  
41 A demographic characteristic of the study populations will be presented, and the time interval of the two scans will  
42 be reported. Cross-tabulation of the index test result by the reference standard results will be made including  
43 missing results, and used to determine diagnostic accuracy expressed as sensitivity, specificity, predictive values, and  
44 likelihood ratios reported with 95% confidence intervals where appropriate. Receiver operating characteristic (ROC)  
45 analysis will also be performed.  
46

47  
48 It is assumed that the reference standard finds 98% of patients and index test 90%. With a power of 80%, at least  
49 132 patients must be included (one-sided McNemar test).  
50

#### 51 **Objective 7 - Diagnostic accuracy of POC-US in diagnosing hydronephrosis in patients suspected of APN**

52  
53 This diagnostic accuracy study will include all participants in track B, who had both the POC-US and MRI successfully  
54 conducted. Index test is the POC-US and reference standard is MRI. The primary outcome is the presence of  
55 hydronephrosis. The reference standard is described by an expert radiologist. The POC-US will be evaluated by the  
56 executive study assistants.  
57

58  
59 The index test results will not be available for reference standard evaluator. The reference standard results will not  
60 be available for the index test performers.

15

1  
2 A demographic characteristic of the study populations will be presented, and the time interval of the two scans will  
3 be reported. Cross-tabulation of the index test result by the reference standard results will be made including  
4 missing results, and used to determine diagnostic accuracy expressed as sensitivity, specificity, predictive values, and  
5 likelihood ratios reported with 95% confidence intervals where appropriate. Receiver operating characteristic (ROC)  
6 analysis will also be performed.  
7  
8

9 It is assumed that the reference standard finds 98% of patients and index test 90%. With a power of 80%, at least  
10 132 patients must be included (one-sided McNemar test).  
11  
12

### 13 **Applicable to all sub-studies**

14  
15 Annually, 5.7% of patients admitted to an ED are diagnosed with CAP and 2.4% with APNs (data from the ED at  
16 Hospital Sønderjylland). Taking into account exclusion criteria, weekends/holidays/missing data, and experience in  
17 patient recruitment, it is estimated that at least 1000 patients admitted with suspected infection must be included in  
18 the study, of which at least 200 patients will be diagnosed with pneumonia and at least 150 patients with APN.  
19  
20

21 No interim analysis will be made. Non-participant analysis is performed. For missing data multiple imputation is  
22 used. Any drop out during the study and the reason will be reported. It is anticipated that once the patients has  
23 consented, the drop-out rate will be minimal.  
24  
25

### 27 **Ethics and dissemination**

28 The project was approved by the Regional Committees on Health Research Ethics for Southern Denmark (S-  
29 20200188), registered by the Danish Data Protection Agency (no. 20/60508) and by clinicaltrials.gov (NCT: 04661085,  
30 04681963, 04667195, 04652167, 04686318, 04686292, 04651712, 04645030, and 04651244). Registration date was  
31 November-December 2020. Signed informed consent will be obtained from all participants after information of the  
32 project has been given both in writing and orally.  
33  
34

35  
36 Participation in track A will contain additional imaging. Patients under the age of 40 are therefore excluded from the  
37 CT due to the extra risk of developing cancer from the radiation. A local hospital physicist has helped with the  
38 following calculations: A typical HRCT gives a radiation dose of approximately 2.2 mSv which corresponds to a cancer  
39 risk of 1:9100. An X-ray gives a radiation dose of approximately 0.06 mSv which corresponds to a cancer risk of  
40 1:333330. An ULDCT gives a radiation dose of approximately 0.1 mSv which corresponds to a cancer risk of 1:200000.  
41 Participation in track A gives each participant approximately 2.26 mSv (ULDCT and HRCT) which corresponds to a  
42 cancer risk of 1:8850(45-48). The examination time of ULDCT and HRCT is approximately 10 minutes.  
43  
44

45 Use of US contrast in rare cases cause allergic reactions; less than 1/10.000 exponents require medical treatment  
46 due to allergic reaction (49). The examination time of advanced US is approximately 20 minutes.  
47  
48

49 MRI does not provide any radiation dose to the patients and is without intravenous contrast. The examination time  
50 is approximately 45 minutes, which is aligned with normal MRI examination time.  
51  
52

53 Overall, risks related to participation in the study is considered minimal, and furthermore, chances are that the  
54 additional diagnostic imaging will inform the clinician in a favorable way before the onset of patient treatment.  
55

56 The treating staff informs the patients about relevant test results. All medical records including laboratory and  
57 imaging can be assessed by the patient via the Danish public healthcare web portal ([www.sundhed.dk](http://www.sundhed.dk))  
58

### 59 **Protocol amendments**

60 Important protocol modifications like changes in eligibility criteria or outcome will be communicated to the relevant  
parties, i.e. sponsor, trial registry, and scientific ethical committee, and explicit described in future publications.

16

### Dissemination policy

The results of the study will be presented in English peer-reviewed recognized scientific journals. The results of the project will also be disseminated through participation in academic and other conferences, as well as through the printed and electronic press. The author panel will include the steering committee, project assistants, and local coordinators in accordance with the Vancouver criteria. No professional writers will be used. Positive, negative and inconclusive results will be published. Diagnostic accuracy studies will follow the guidelines for reporting diagnostic accuracy studies (STARD) (50), cross sectional studies will follow the guidelines for strengthening the reporting of observational studies in epidemiology (STROBE) (51), and randomized studies will follow the consolidated standards of reporting trials (CONSORT) (52).

### Access to data

Only the members of the steering committee and project assistants will have access to the final trial dataset. Other researchers may be granted access to the anonymized data for analysis on reasonable request to the corresponding authors.

## Discussion

COVID-19 and the consequent societal lockdown might affect trial recruitment and patient distribution. This might lead to an extended recruitment period, as patients suspected of an infectious not related to COVID-19 may be admitted to other departments than the ED, so the ED will be able to handle the many COVID-19 patients. The lockdown may also reduce the number of infections in the society, so fewer patient will visit the hospital, and the distribution of the infections might differ since e.g. the airborne transmitted infections will be reduced. This challenge will especially sub-study 1 be aware of when presenting the results.

After completion of the study, a novel diagnostic algorithm will be developed. Subsequently, the plan is to test the algorithm in a national setting including at least eight EDs. The results can be implemented in daily work and routines. The study will also be able to characterize the patients, who are diagnosed at the ED with an infection of unknown origin and prescribed broad-spectrum antibiotics.

The study is only generalisable to settings where appropriately trained staff and equipment can perform POC-US, and well-resourced settings where a rapid POC-PCR and POC-UFC service is available.

The results of the study will have both national and international interest, as the challenges are common and the solutions can easily be applied in hospitals with a similar technological context. Securing rapid and reliable diagnosis of two of the most common infections diagnosed in the ED, will encourage the reduction of broad-spectrum antibiotics and thereby the development of multi-resistant bacteria.

## Declarations

**Abbreviations:** acute pyelonephritis (APN), Anatomical therapeutic chemical (ATC), area under the curve (AUC), community-acquired pneumonia (CAP), cluster of differentiation 4 (CD4), contrast enhanced ultrasound (CEUS), Coronavirus Disease 2019 (COVID-19), C-reactive protein (CRP), emergency department (ED), human immunodeficiency virus (HIV), high-resolution dose computed tomography (HRCT), magnetic resonance imaging (MRI), Objective Structured Assessment of US Skills (OASUS), polymerase-chain-reaction (PCR), serum procalcitonin (PCT), Point-of-care (POC), receiver operating characteristic (ROC), Soluble urokinase plasminogen activator receptor (suPAR), urine flow cytometry (UFC), ultralow dose computed tomography (ULDCT), and ultrasound (US).

**Protocol version:** January 25<sup>th</sup> 2021, version 1.0



17

**Ethics approval:** The project was approved by the Regional Committees on Health Research Ethics for Southern Denmark (S-20200188), registered by the Danish Data Protection Agency (20/60508) and by clinicaltrials.gov (NCT: 04661085, 04681963, 04667195, 04652167, 04686318, 04686292, 04651712, 04645030, and 04651244). Each patient provided written informed consent.

**Data sharing statement:** Due to Danish laws on personal data, data cannot be shared publicly. To request these data, please contact the corresponding author for more information.

**Competing interests:** The authors declare that they have no competing interests

**Patient and Public Involvement:** The patients or public were not involved in the development of the research question or the study design.

**Funding:** This work was supported by the Region of Southern Denmark (Damhaven 12, 7100 Vejle, Denmark; kontakt@rsyd.dk), University of Southern Denmark (Campusvej 55, 5230 Odense, Denmark; sdu@sdu.dk), Hospital Sønderjylland (Kresten Philipsensvej 15, 6200 Aabenraa, Denmark, email shs.kontakt@rsyd.dk). The financial sponsors had no influence on the data, analysis, results, or content of publication.

**Authors' contributions:** HS, OG, FSR, ERBP, CØ, CBL, TAS, SP, MBC, and CBM conceptualized and all authors designed the study and data collection in detail. HS, AH, MHL, MBC, and CBM reviewed the literature. AH, MHL, MBC, and MAH will recruit participants, and HS, OG, FSR, ERBP, CØ, CBL, TAS, SP, MBC, and CBM will supervise data collection and analysis. HS, AH, MHL, MBC, MAH, and CBM will carry out statistical analysis and write the first manuscripts, which will be critically reviewed by all authors, who will finally approve the manuscripts before submission. HS and CBM are responsible for the overall content as guarantors. The corresponding author attests that all listed authors meet authorship criteria and that no others meeting the criteria have been omitted.

**Steering committee:** Composed of representatives from the involved type of departments: emergency, microbiology, biochemistry, and radiology. The role of the committee is to develop the scientific framework of the study, make final decisions on major issues during the data collection and data management period. The committee is responsible for all financial issues. Members of the steering committee are HS, OG, FSR, ERBP, and CBM.

**Roles and responsibilities:** CBM is the legal sponsor and the study chief investigator (Christian.Backer.Mogensen@rsyd.dk). HSA is the principal investigator.

**Participating departments:** All departments are located in Denmark  
Emergency Department, Hospital Sønderjylland, Aabenraa. Emergency Department, Hospital Lillebælt, Kolding.  
Emergency Department, Odense University Hospital, Odense.  
Radiology Department, Hospital Sønderjylland, Aabenraa. Radiology Department, Hospital Lillebælt, Kolding.  
Radiology Department, Odense University Hospital, Odense.  
Department of Microbiology, Hospital Sønderjylland, Sønderborg. Department of Clinical Microbiology, Lillebælt Hospital, Vejle. Department of Clinical Microbiology, Odense University Hospital, Odense.  
Bloodsamples, Biochemistry and Immunology, Hospital Sønderjylland, Aabenraa. Biochemistry and Immunology, Lillebælt Hospital, Kolding and Vejle. Clinical Biochemistry and Pharmacology, Odense University Hospital, Odense.

**Acknowledgements:** In performing our protocol, we received help and guidance from some respected persons, who deserve our greatest gratitude: Research Radiographer Bo Mussmann from Radiology Department at Odense University Hospital in Denmark, Professor Michael Pedersen from Department of Clinical Medicine at Aarhus University Hospital in Denmark, Professor Ivan Brandslund from Department of Clinical Biochemistry at Sygehus Lillebælt in Denmark, and Research assistant Mette Bach Nielsen from Emergency Department at Hospital Sønderjylland in Denmark.

## Literature references

1. WHO. Antimicrobial resistance - Global report and surveillance. France: World Health Organization; 2014.
2. Bager FE-I, J.; Larsen, AR.; Sönksen, UW. DANMAP 2018 - Use of antimicrobial agents and occurrence of antimicrobial resistance in bacteria from food animals, food and humans in Denmark. 2018.
3. Skjøt-Arkil H, Mogensen CB, Lassen AT, Johansen IS, Chen M, Petersen P, et al. Carrier prevalence and risk factors for colonisation of multiresistant bacteria in Danish emergency departments: a cross-sectional survey. *BMJ Open*. 2019;9(6):e029000.
4. Sundhedsstyrelsen. Vejledning om ordination af antibiotika. Copenhagen: Danish Health Organisation; 2012.
5. Sundhedsstyrelsen. Vejledning om forebyggelse af spredning af MRSA. 2016.
6. Sundhedsstyrelsen. Vejledning og forebyggelse af om spredning af CPO. 2018.
7. Ældreministeriet S-o. National handlingsplan for antibiotika til mennesker - tre målbare mål for en reduktion af antibiotikaforbruget frem mod 2020. 2017.
8. Hellesøe AM, CB.; Anhøj, J.; Jensen, JN.; Bak, H.; Ellermann-Eriksen, S.; Christian, T.; LKT Antibiotika afslutnings- og evalueringsrapport. 2019.
9. Cartuliales MB, Sundal LM, Gustavsson S, Skjøt-Arkil H, Mogensen CB. Limited value of sputum culture to guide antibiotic treatment in a Danish emergency department. *Dan Med J*. 2020;67(11).
10. Funk DJ, Kumar A. Antimicrobial therapy for life-threatening infections: speed is life. *Crit Care Clin*. 2011;27(1):53-76.
11. The top 10 causes of death: World Health Organization; 2018 [Available from: <https://www.who.int/news-room/fact-sheets/detail/the-top-10-causes-of-death> (accessed July 2019).
12. Kennedy M, Joyce N, Howell MD, Lawrence Mottley J, Shapiro NI. Identifying infected emergency department patients admitted to the hospital ward at risk of clinical deterioration and intensive care unit transfer. *Acad Emerg Med*. 2010;17(10):1080-5.
13. Chandra A, Nicks B, Maniago E, Nouh A, Limkakeng A. A multicenter analysis of the ED diagnosis of pneumonia. *Am J Emerg Med*. 2010;28(8):862-5.
14. Reed WW, Byrd GS, Gates RH, Jr., Howard RS, Weaver MJ. Sputum gram's stain in community-acquired pneumococcal pneumonia. A meta-analysis. *West J Med*. 1996;165(4):197-204.
15. Schuetz P, Christ-Crain M, Muller B. Procalcitonin and other biomarkers to improve assessment and antibiotic stewardship in infections--hope for hype? *Swiss Med Wkly*. 2009;139(23-24):318-26.
16. Savvateeva EN, Rubina AY, Gryadunov DA. Biomarkers of Community-Acquired Pneumonia: A Key to Disease Diagnosis and Management. *Biomed Res Int*. 2019;2019:1701276.
17. Hey J, Thompson-Leduc P, Kirson NY, Zimmer L, Wilkins D, Rice B, et al. Procalcitonin guidance in patients with lower respiratory tract infections: a systematic review and meta-analysis. *Clin Chem Lab Med*. 2018;56(8):1200-9.
18. Self WH, Balk RA, Grijalva CG, Williams DJ, Zhu Y, Anderson EJ, et al. Procalcitonin as a Marker of Etiology in Adults Hospitalized With Community-Acquired Pneumonia. *Clin Infect Dis*. 2017;65(2):183-90.
19. Hamie L, Daoud G, Nemer G, Nammour T, El Chediak A, Uthman IW, et al. SuPAR, an emerging biomarker in kidney and inflammatory diseases. *Postgrad Med J*. 2018;94(1115):517-24.
20. Masajtis-Zagajewska A, Nowicki M. New markers of urinary tract infection. *Clin Chim Acta*. 2017;471:286-91.
21. Caterino JM, Leininger R, Kline DM, Southerland LT, Khaliqdina S, Baugh CW, et al. Accuracy of Current Diagnostic Criteria for Acute Bacterial Infection in Older Adults in the Emergency Department. *J Am Geriatr Soc*. 2017;65(8):1802-9.
22. Bourcier JE, Paquet J, Seinger M, Gallard E, Redonnet JP, Cheddadi F, et al. Performance comparison of lung ultrasound and chest x-ray for the diagnosis of pneumonia in the ED. *Am J Emerg Med*. 2014;32(2):115-8.
23. Orso D, Guglielmo N, Copetti R. Lung ultrasound in diagnosing pneumonia in the emergency department: a systematic review and meta-analysis. *Eur J Emerg Med*. 2018;25(5):312-21.
24. Claeys KC, Blanco N, Morgan DJ, Leekha S, Sullivan KV. Advances and Challenges in the Diagnosis and Treatment of Urinary Tract Infections: the Need for Diagnostic Stewardship. *Curr Infect Dis Rep*. 2019;21(4):11.
25. Shallcross L, Gaskell K, Fox-Lewis A, Bergstrom M, Noursadeghi M. Mismatch between suspected pyelonephritis and microbiological diagnosis: a cohort study from a UK teaching hospital. *J Hosp Infect*. 2018;98(2):219-22.
26. Quiaia E, Correias JM, Mehta M, Murchison JT, Gennari AG, van Beek EJR. Gray Scale Ultrasound, Color Doppler Ultrasound, and Contrast-Enhanced Ultrasound in Renal Parenchymal Diseases. *Ultrasound Q*. 2018;34(4):250-67.
27. Mitterberger M, Pinggera GM, Colleselli D, Bartsch G, Strasser H, Steppan I, et al. Acute pyelonephritis: comparison of diagnosis with computed tomography and contrast-enhanced ultrasonography. *BJU Int*. 2008;101(3):341-4.

19

28. Kazmierski B, Deurdulian C, Tchelepi H, Grant EG. Applications of contrast-enhanced ultrasound in the kidney. *Abdom Radiol (NY)*. 2018;43(4):880-98.
29. Huang HS, Tsai CL, Chang J, Hsu TC, Lin S, Lee CC. Multiplex PCR system for the rapid diagnosis of respiratory virus infection: systematic review and meta-analysis. *Clin Microbiol Infect*. 2018;24(10):1055-63.
30. Long B, Koyfman A. The Emergency Department Diagnosis and Management of Urinary Tract Infection. *Emerg Med Clin North Am*. 2018;36(4):685-710.
31. Rowe TA, Juthani-Mehta M. Diagnosis and management of urinary tract infection in older adults. *Infect Dis Clin North Am*. 2014;28(1):75-89.
32. Institut SS. Urinvejsinfektioner: Blærebetændelse og nyrebækkenbetændelse Statens Serum Institut: Statens Serum Institut; 2017 [Available from: <https://www.ssi.dk/sygdomme-beredskab-og-forskning/sygdomsleksikon/u/urinvejsinfektioner> (Accessed April 2019)].
33. Herraes O, Asencio MA, Carranza R, Jarabo MM, Huertas M, Redondo O, et al. Sysmex UF-1000i flow cytometer to screen urinary tract infections: the URISCAM multicentre study. *Lett Appl Microbiol*. 2018;66(3):175-81.
34. Chan AW, Tetzlaff JM, Altman DG, Laupacis A, Gøtzsche PC, Krleža-Jerić K, et al. SPIRIT 2013 statement: defining standard protocol items for clinical trials. *Ann Intern Med*. 2013;158(3):200-7.
35. The Region of Southern Denmark traw. Den Regionale Antibiotikagruppe. Diagnostik og behandling af akutte infektioner på sygehusene i Region Syddanmark. 2016.
36. Skovsted TA, Petersen ERB, Fruekilde MB, Pedersen AK, Pielak T, Eugen-Olsen J. Validation of suPAR turbidimetric assay on Cobas® (c502 and c702) and comparison to suPAR ELISA. *Scand J Clin Lab Invest*. 2020;80(4):327-35.
37. BioFire. 2018. FilmArray Pneumonia panel instruction booklet RFIT-ASY0144/145. BioFire SLC, UT.
38. Harris PA, Taylor R, Thielke R, Payne J, Gonzalez N, Conde JG. Research electronic data capture (REDCap)—a metadata-driven methodology and workflow process for providing translational research informatics support. *Journal of biomedical informatics*. 2009;42(2):377-81.
39. Volpicelli G, Elbarbary M, Blaivas M, Lichtenstein DA, Mathis G, Kirkpatrick AW, et al. International evidence-based recommendations for point-of-care lung ultrasound. *Intensive Care Med*. 2012;38(4):577-91.
40. Laursen CB, Clive A, Hallifax R, Pietersen PI, Asciak R, Davidsen JR, et al. European Respiratory Society Statement on Thoracic Ultrasound. *Eur Respir J*. 2020.
41. Laursen BLG, O.; Davidsen, J. R. et. al. Basal klinisk ultralydsdiagnostik. Copenhagen: Munksgaard; 2017. Available from: <https://basal-klinisk-ultralydsdiagnostik.munksgaard.dk/>.
42. Biosoft. easyROC: a web-tool for ROC curve analysis [1.3.1:[Available from: <http://www.biosoft.hacettepe.edu.tr/easyROC/> (Accessed January 3rd 2020)].
43. Mody L, Juthani-Mehta M. Urinary tract infections in older women: a clinical review. *JAMA*. 2014;311(8):844-54.
44. GAIL MH, WIEAND S, Piantadosi S. Biased estimates of treatment effect in randomized experiments with nonlinear regressions and omitted covariates. *Biometrika*. 1984;71(3):431-44.
45. Huda W, Ogden KM, Khorasani MR. Converting dose-length product to effective dose at CT. *Radiology*. 2008;248(3):995-1003.
46. Sodickson A, Baeyens PF, Andriole KP, Prevedello LM, Nawfel RD, Hanson R, et al. Recurrent CT, cumulative radiation exposure, and associated radiation-induced cancer risks from CT of adults. *Radiology*. 2009;251(1):175-84.
47. Brenner DJ, Hall EJ. Computed tomography--an increasing source of radiation exposure. *N Engl J Med*. 2007;357(22):2277-84.
48. Mayo-Smith WW, Hara AK, Mahesh M, Sahani DV, Pavlicek W. How I do it: managing radiation dose in CT. *Radiology*. 2014;273(3):657-72.
49. Chong WK, Papadopoulou V, Dayton PA. Imaging with ultrasound contrast agents: current status and future. *Abdom Radiol (NY)*. 2018;43(4):762-72.
50. Cohen JF, Korevaar DA, Altman DG, Bruns DE, Gatsonis CA, Hooft L, et al. STARD 2015 guidelines for reporting diagnostic accuracy studies: explanation and elaboration. *BMJ Open*. 2016;6(11):e012799.
51. Vandenberghe JP, von Elm E, Altman DG, Gøtzsche PC, Mulrow CD, Pocock SJ, et al. Strengthening of Reporting of Observational Studies in Epidemiology (STROBE): explanation and elaboration. *PLoS Med*. 2007;4(10):e297.
52. Moher D, Hopewell S, Schulz KF, Montori V, Gøtzsche PC, Devereaux PJ, et al. CONSORT 2010 explanation and elaboration: updated guidelines for reporting parallel group randomised trials. *BMJ*. 2010;340:c869.



Figure 1 Design of patient flow and diagnostic tracks

170x182mm (150 x 150 DPI)

1  
2  
3 **Appendix**  
4  
5

- 6 I. Informed consent materials
- 7 II. Biological specimens
- 8 III. Schedule of enrollment, interventions, and assessments
- 9 IV. Targets in POC-PCR
- 10 V. Recommended action list
- 11 VI. Template for reference standard
- 12 VII. Algorithm for antibiotic prescription
- 13
- 14
- 15
- 16
- 17
- 18
- 19
- 20
- 21
- 22
- 23
- 24
- 25
- 26
- 27
- 28
- 29
- 30
- 31
- 32
- 33
- 34
- 35
- 36
- 37
- 38
- 39
- 40
- 41
- 42
- 43
- 44
- 45
- 46
- 47
- 48
- 49
- 50
- 51
- 52
- 53
- 54
- 55
- 56
- 57
- 58
- 59
- 60

For peer review only

## Appendix I - Informed consent materials

Informed consent materials given to the participants has been developed in three versions – track A, B, and C, respectively. The written consent form can be found at the end of appendix I. It is all in Danish.

### Participant information - Track A

**Deltagerinformation om deltagelse i videnskabeligt forskningsprojekt for personer, der indlægges akut med mistanke om lungebetændelse**

## **Forbedret diagnostik af akutte infektioner**

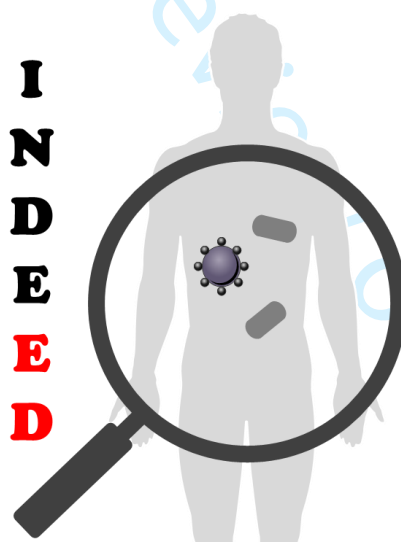

**Infectious Diagnostics in Emergency Departments (INDEED study)**

**Et samarbejdsprojekt på tværs af specialer på Sygehus Sønderjylland, Sygehus Lillebælt og Odense  
Universitetshospital med udgangspunkt i Akutafdelingerne**

1  
2  
3  
4  
5 *Vi vil spørge, om du vil deltage i et videnskabeligt projekt?*

6  
7 *Projektet handler om at blive bedre til at diagnosticere lungebetændelse på Akutafdelingen, så en*  
8 *målrettet behandling kan igangsættes så hurtigt som muligt.*

9  
10 *Før du beslutter, om du vil deltage i projektet, skal du fuldt ud forstå, hvad projektet går ud på, og*  
11 *hvorfor vi gennemfører det. Vi vil derfor bede dig om at læse denne deltagerinformation grundigt.*

12  
13 *Hvis du beslutter dig for at deltage, vil vi bede dig om at underskrive en samtykkeerklæring. Husk,*  
14 *at du har ret til at rådføre dig hos familie, venner eller bekendte. Du har også ret til betænkningstid*  
15 *før du underskriver, men da der er tale om en akut infektion, som kræver hurtig behandling, beder*  
16 *vi om, at du beslutter dig inden for 30 minutter.*

17  
18 *Det er frivilligt at deltage i projektet. Du kan når som helst og uden at give en grund trække dit*  
19 *samtykke tilbage. Hvis du trækker dit samtykke om deltagelse i projektet tilbage, vil det ikke få*  
20 *konsekvenser for din videre behandling.*

## 21 22 23 24 25 26 27 Projektets mål

28 De redskaber og undersøgelser, der eksisterer i dag til at diagnosticere lungebetændelse, har mange  
29 begrænsninger. Det udfordrer lægen i at stille en sikker diagnose inden for kort tid og igangsætte en  
30 målrettet behandling. Det kan få konsekvenser for den enkelte persons indlæggelsesforløb. Hvis man  
31 behandler med antibiotika som dækker flere bakterier end nødvendigt vil det også bidrage til udviklingen af  
32 bakterier, som er modstandsdygtige over for mange antibiotika.

33  
34  
35  
36 Projektet har derfor til formål at finde bedre redskaber, som kan hjælpe lægen til at stille en sikker  
37 diagnose inden for få timer for personer, indlagt akut med mistanke om lungebetændelse.

## 38 39 40 Det undersøger projektet

41 Projektet vil undersøge

- 42 • hvilke symptomer, tegn og forhold, der kendetegner lungebetændelse og sygdomsgraden
- 43 • hvilke markører for infektion i blodet, der bedst kan identificere en lungebetændelse og
- 44 sygdomsgraden
- 45 • om en ny metode til at måle bakterier i urinen er nyttig
- 46 • om en ny metode til at identificere bakterier i sekret fra lungerne er nyttig
- 47 • om ultralydsundersøgelse og CT-skanning med meget lav strålingsrisiko kan bruges til at
- 48 diagnosticere lungebetændelse
- 49
- 50
- 51
- 52

## 53 54 Plan for projektet

55  
56 Projektet foregår på Fælles Akutmodtagelsen i Aabenraa, Sygehus Sønderjylland, på Akutafdelingen i  
57 Kolding, Sygehus Lillebælt, og på Fælle Akut Modtagelsen i Odense, Odense Universitetshospital. Fra  
58  
59  
60



1  
2  
3  
4 februar 2021 til vinteren 2021/22 vil 500 voksne personer, som indlægges akut med mistanke om  
5 lungebetændelse på de tre akutafdelinger, blive inviteret til at deltage.  
6

7 Personalet vil i forbindelse med din indlæggelse opsøge og informere dig om projektet, og tilbyde  
8 deltagelse i projektet. Da det er vigtigt at en akut infektion bliver behandlet hurtigt, vil vi bede dig om at  
9 tilkendegive din beslutning inden for en halv time.  
10  
11

### 12 Det indebærer deltagelse i projektet for dig

13 Deltagelse i projektet betyder, at du vil modtage den normale behandling, afdelingen tilbyder, og  
14 derudover få foretaget ekstra undersøgelser.  
15  
16

17 Vi vil stille dig nogle spørgsmål omkring dine symptomer, tidligere og aktuelle sygdomme, og hvordan du  
18 har det. Vi beder i den forbindelse adgang til din patientjournal, for at følge op på eventuelle tidligere  
19 indlæggelser, den aktuelle indlæggelse, og eventuelle indlæggelser inden for den næste måned efter du er  
20 udskrevet.  
21  
22

23 Vi vil tage 14mL ekstra blod svarende til 2 ekstra rør, når du alligevel får taget blodprøve, og hjælpe dig med  
24 at aflevere en urinprøve.  
25  
26

27 Af det sekret fra lungerne, som der bliver taget ifølge normal behandling, vil vi tage en lille del fra nogle af  
28 projektpersonerne, og undersøge det med en ny metode.  
29

30 Det blod, urin og sekret fra lungerne, der indhentes til projektet, vil blive destrueret, når projektet er  
31 afsluttet.  
32  
33

34 Hvis du vælger at deltage, skal du have taget to ekstra skanninger af lungerne. 1) Ultralydsskanning som  
35 foretages på akutafdelingen og tager 5 min. 2) En CT-skanning som består af en skanning med meget lav  
36 strålingsrisiko, og en højopløselig CT-skanning, som er den mest præcise skanning, der benyttes på  
37 lungerne i dag. CT-skanningen vil i alt tage 10 min.  
38  
39

40 Dit samtykke vil give den forsøgsansvarlige, sponsor og dennes repræsentant direkte adgang til relevante  
41 helbredsoplysninger i journalen for at kunne gennemføre, overvåge og kontrollere projektet. I projektet vil  
42 behandlingen af personoplysninger følge databeskyttelsesloven og databeskyttelsesforordningen. Efter  
43 indsamling af de ønskede informationer vil dine persondata blive fjernet fra vores registreringsystem, og  
44 dit personnummer vil blive erstattet af en kode (pseudo-anonymisering).  
45  
46

### 47 Bivirkninger, risici, komplikationer og ulemper

48 Der er ingen eller kun få kendte risici eller bivirkninger ved at deltage i projektet. Alle  
49 prøvetagningsmetoder er velkendte og almindeligt anvendte procedurer, som vi har stor erfaring med og  
50 kendskab til. Der kan dog være risici ved undersøgelserne, som vi endnu ikke kender. Vi beder dig derfor  
51 om at fortælle, hvis du oplever problemer i forbindelse med prøvetagning og undersøgelser. Hvis vi  
52 opdager bivirkninger, som vi ikke allerede har fortalt dig om, vil du naturligvis blive orienteret med det  
53 samme, og du vil skulle tage stilling til, om du ønsker at fortsætte med prøvetagning og undersøgelser.  
54  
55  
56  
57  
58  
59  
60

De ekstra blodprøver til projektet tages i forbindelse med de blodprøver, der alligevel tages ved indlæggelse. Risici og bivirkninger ved at få taget en blodprøve kan være ubehageligt, lette smerter og/eller blå mærker, og i nogle tilfælde besvimelse. I sjældne tilfælde kan der opstå en mindre blodansamling eller betændelse ved indstiksstedet.

Urinprøven kan som regel afleveres i et bæger, opsamlet ved toiletbesøg. Er du kateterbærer eller på grund af sygdom ikke selv kan lade vandet, kan det blive nødvendigt at hjælpe vandladningen på vej med et kateter, som er et tyndt plastikrør til indførsel i blæren via urinrøret. Denne procedure kan give let ubehag og eventuelt kortvarig mindre blødning fra slimhinderne.

Skanningerne er ikke forbundet med smerte, men du kan eventuelt opleve ubehag ved flytningen til CT-skanneren. Væsentligste risiko i forbindelse med deltagelse i projektet er den ekstra stråledosis som CT-skanningen medfører. Den ekstra stråledosis, du udsættes for, udgør i alt lidt mindre end den baggrundstråling, som du normalt udsættes for i løbet af et år. Strålingen fra skanningen medfører en let øget risiko for udvikling kræft på ca. 0,01-0,1% og svarer til, at den samlede livstidsrisiko for kræft stiger fra 25% til 25,1%. Denne risiko vurderes dog betydningsløs i forhold til de risici, der i øvrigt er ved din aktuelle indlæggelse.

### Dine prøvesvar

Ønsker du svar på de almindelige blod- og urinundersøgelser, kan du se det på [www.sundhed.dk](http://www.sundhed.dk). Svar på de ekstra blod- og urinundersøgelser i projektet vil ikke fremkomme her, da vi ikke kender betydningen af resultaterne endnu. Har svarene et alarmerende resultat, vil den behandlende læge få besked og vil vurdere, om det har betydning for din behandling. Resultatet af den ekstra undersøgelse af sekret fra lungerne, som der vil kunne blive lavet i projektet, vil lægen, der behandler dig, blive orienteret om.

Skanningsresultaterne vil være synlige for lægerne, der behandler dig, og indgå i deres vurdering og behandling. Hvis vi skulle opdage noget, der kunne give os mistanke om andre sygdomme (f.eks. kræft), vil vi via din læge kontakte dig og tilbyde yderligere udredning. Bidrager skanningerne ikke med viden, der ændrer på din behandling eller diagnose, hører du ikke nærmere til skanningsresultatet.

### Nytte ved projektet

Projektet er vigtigt for at vi fremadrettet kan gøre indlæggelsesforløbet for personer, der indlægges akut med mistanke om lungebetændelse, bedre. Projektet vil have en afgørende betydning for praksis på akutafdelingerne, og formentlig hvilken type antibiotika lægen ordinerer. Et mere målrettet antibiotikaforbrug vil bidrage til reduktion af bakterier, der er modstandsdygtige over for antibiotika, og dermed sikre at infektioner i fremtiden også kan behandles med antibiotika.

For dig personligt, vil deltagelse ikke umiddelbart have en betydning for dit behandlingsforløb. Hvis der skulle ske at være nogle særlige komplikationer til din aktuelle sygdom relateret til lungerne, vil vi dog med de ekstra scanninger formentlig hurtigere erkende dette.

### Udelukkelse fra undersøgelse

Du vil udgå af dele af projektet, hvis nogle af undersøgelserne mislykkes af fx tekniske grunde eller hvis din behandlende læge vurderer, at det er for risikabelt for dig at deltage.

## Adgang til projektets resultater

Projektets samlede resultater vil blive offentliggjort 2024 i videnskabelige tidsskrifter samt på sygehusenes hjemmesider. Resultater med relevans for beslutningstagere i sundhedsvæsenet vil blive offentliggjort i danske medier og tidsskrifter. Det sikres, at ingen deltagere kan genkendes i det, som offentliggøres. Har du interesse i at vide mere om projektets resultater, kan du efter offentliggørelse opsøge dem via <http://www.sygehussonderjylland.dk/wm521282>.

*Vi håber, at du med denne information har fået tilstrækkeligt indblik i, hvad det vil sige at deltage i projektet, og at du føler dig rustet til at tage beslutningen om din eventuelle deltagelse. Hvis du vil vide mere, er du meget velkommen til at kontakte os. Information om dine rettigheder er vedlagt denne deltagerinformation sidst i dokumentet (Bilag 1).*

*Hvis du beslutter dig for at deltage i projektet, vil vi bede dig om at underskrive samtykkeerklæringen. Du kan vælge om du vil give samtykke til hele projektet eller kun dele af projektet. Det er frivilligt at deltage i projektet, og du kan når som helst og uden at give en grund trække dit samtykke tilbage. Det vil ikke få konsekvenser for den videre behandling.*

*Yderligere oplysninger kan fås ved henvendelse til*

Professor og overlæge Christian Backer Mogensen  
Fælles Akutmodtagelsen, Sygehus Sønderjylland  
Kresten Philipsens Vej 15 - 6200 Aabenraa  
[Christian.Backer.Mogensen@rsyd.dk](mailto:Christian.Backer.Mogensen@rsyd.dk)  
Tlf: 79971123

### **Initiativtagere til projektet**

*Projektet er primært udarbejdet i samarbejde mellem Akutafdeling, Biokemisk Afdeling og Mikrobiologisk Afdeling, og Radiologisk Afdeling på Sygehus Sønderjylland, Sygehus Lillebælt og Odense Universitets Hospital. Projektet er forankret på Sygehus Sønderjylland og Institut for Regional Sundhedsforskning på Syddansk Universitet, som er ansøgnings- og bevillingsansvarlige.*

### **Økonomisk støtte til projektet**

*Projektet har fået økonomisk støtte i form af ph.d. stipendiat fra Syddansk Universitet (1.650.000kr), ph.d.-stipendiat fra Sygehus Sønderjylland (4.800.000kr) samt støtte til drift fra Region Syddanmark (500.000kr). Forsøgsansvarlige har ingen økonomisk tilknytning til støttestyrelser eller andre interessenter i forsøget. Der vil ikke være en økonomisk kompensation til patienter, der deltager i projektet.*

## Participant information - Track B

Deltagerinformation om deltagelse i videnskabeligt forskningsprojekt for personer, der indlægges akut med mistanke om nyrebækkenbetændelse

## Forbedret diagnostik af akutte infektioner

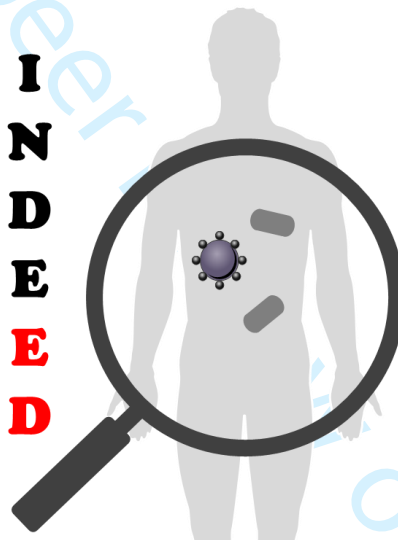

**Infectious Diagnostics in Emergency Departments (INDEED study)**

**Et samarbejdsprojekt på tværs af specialer på Sygehus Sønderjylland, Sygehus Lillebælt og Odense  
Universitetshospital med udgangspunkt i Akutafdelingerne**

1  
2  
3  
4  
5 *Vi vil spørge, om du vil deltage i et videnskabeligt projekt?*

6  
7 *Projektet handler om at blive bedre til at diagnosticere akut nyrebækkenbetændelse på*  
8 *Akutaafdelingen, så en målrettet behandling kan igangsættes så hurtigt som muligt.*

9  
10 *Før du beslutter, om du vil deltage i projektet, skal du fuldt ud forstå, hvad projektet går ud på, og*  
11 *hvorfor vi gennemfører det. Vi vil derfor bede dig om at læse denne deltagerinformation grundigt.*

12  
13 *Hvis du beslutter dig for at deltage, vil vi bede dig om at underskrive en samtykkeerklæring. Husk,*  
14 *at du har ret til at rådføre dig hos familie, venner eller bekendte. Du har også ret til betænkningstid*  
15 *før du underskriver, men da der er tale om en akut infektion, som kræver hurtig behandling, beder*  
16 *vi om, at du beslutter dig inden for 30 minutter.*

17  
18 *Det er frivilligt at deltage i projektet. Du kan når som helst og uden at give en grund trække dit*  
19 *samtykke tilbage. Hvis du trækker dit samtykke om deltagelse i projektet tilbage, vil det ikke få*  
20 *konsekvenser for din videre behandling.*

## 21 22 23 24 25 26 27 Projektets mål

28 De redskaber og undersøgelser, der eksisterer i dag til at diagnosticere nyrebækkenbetændelse, har mange  
29 begrænsninger. Det udfordrer lægen i at stille en sikker diagnose inden for kort tid og igangsætte en  
30 målrettet behandling. Det kan få konsekvenser for den enkelte persons indlæggelsesforløb. Hvis man  
31 behandler med antibiotika som dækker flere bakterier end nødvendigt vil det også bidrage til udviklingen af  
32 bakterier, som er modstandsdygtige over for mange antibiotika.

33  
34  
35  
36 Projektet har derfor til formål at finde bedre redskaber, som kan hjælpe lægen til at stille en sikker  
37 diagnose inden for få timer for personer, indlagt akut med mistanke om akut nyrebækkenbetændelse.

## 38 39 40 Det undersøger projektet

41 Projektet vil undersøge

- 42 • hvilke symptomer, tegn og forhold, der kendetegner nyrebækkenbetændelse og sygdomsgraden
- 43 • hvilke markører for infektion i blodet, der bedst kan identificere en nyrebækkenbetændelse og
- 44 sygdomsgraden
- 45 • om en ny metode til at måle bakterier i urinen er nyttig
- 46 • om ultralydsundersøgelse med og uden kontrastvæske kan bidrage til at diagnosticere
- 47 nyrebækkenbetændelse
- 48
- 49
- 50
- 51

## 52 53 Plan for projektet

54 Projektet foregår på Fælles Akutmodtagelsen i Aabenraa, Sygehus Sønderjylland, på Akutaafdelingen i  
55 Kolding, Sygehus Lillebælt, og på Fælle Akut Modtagelsen i Odense, Odense Universitetshospital. Fra  
56 februar 2021 til vinteren 2021/22 vil 300 voksne personer, som indlægges akut med mistanke om  
57 nyrebækkenbetændelse på de tre akutaafdelinger, blive inviteret til at deltage.  
58  
59  
60

Personalet vil i forbindelse med din indlæggelse opsøge og informere dig om projektet, og tilbyde deltagelse i projektet. Da det er vigtigt at en akut infektion bliver behandlet hurtigt, vil vi bede dig om at tilkendegive din beslutning inden for en halv time.

### Det indebærer deltagelse i projektet for dig

Deltagelse i projektet betyder, at du vil modtage den normale behandling, afdelingen tilbyder, og derudover få foretaget ekstra undersøgelser.

Vi vil stille dig nogle spørgsmål omkring dine symptomer, tidligere og aktuelle sygdomme, og hvordan du har det. Vi beder i den forbindelse adgang til din patientjournal, for at følge op på eventuelle tidligere indlæggelser, den aktuelle indlæggelse, og eventuelle indlæggelser inden for den næste måned efter du er udskrevet.

Vi vil tage 14mL ekstra blod svarende til 2 ekstra rør, når du alligevel får taget blodprøve, og hjælpe dig med at aflevere en urinprøve.

Det blod og urin, der indhentes til projektet, vil blive destrueret, når projektet er afsluttet.

Vi vil tilbyde dig tre ekstra skanninger af nyrerne. 1) Ultralydsskanning som foretages på akutafdelingen og tager 5 min. 2) Ultralydsskanning, hvor der sprøjtes kontrastvæske ind i dine blodårer, og som foretages af en røntgenlæge. Skanningen tager 20 min. 3) MR-skanning af røntgenlægen, og som tager 45 min. Det tilstræbes, at skanningerne foretages i forbindelse med din indlæggelse. Hvis du udskrives før, kan det være nødvendigt, at du møder op til skanningerne dagen efter.

Dit samtykke vil give den forsøgsansvarlige, sponsor og denne repræsentant direkte adgang til relevante helbredsoplysninger i journalen for at kunne gennemføre, overvåge og kontrollere projektet. I projektet vil behandlingen af personoplysninger følge databeskyttelsesloven og databeskyttelsesforordningen. Efter indsamling af de ønskede informationer vil dine persondata blive fjernet fra vores registreringsystem, og dit personnummer vil blive erstattet af en kode (pseudo-anonymisering).

### Bivirkninger, risici, komplikationer og ulemper

Der er ingen eller kun få kendte risici eller bivirkninger ved at deltage i projektet. Alle prøvetagningsmetoder er velkendte og almindeligt anvendte procedurer, som vi har stor erfaring med og kendskab til. Der kan dog være risici ved undersøgelserne, som vi endnu ikke kender. Vi beder dig derfor om at fortælle, hvis du oplever problemer i forbindelse med prøvetagning og undersøgelser. Hvis vi opdager bivirkninger, som vi ikke allerede har fortalt dig om, vil du naturligvis blive orienteret med det samme, og du vil skulle tage stilling til, om du ønsker at fortsætte med prøvetagning og undersøgelser.

De ekstra blodprøver til projektet tages i forbindelse med de blodprøver, der alligevel tages ved indlæggelse. Risici og bivirkninger ved at få taget en blodprøve kan være ubehageligt, lette smerter og/eller blå mærker, og i nogle tilfælde besvimelse. I sjældne tilfælde kan der opstå en mindre blodansamling eller betændelse ved indstiksstedet.

Urinprøven kan som regel afleveres i et bæger, opsamlet ved toiletbesøg. Er du kateterbærer eller på grund af sygdom ikke selv kan lade vandet, kan det blive nødvendigt at hjælpe vandladningen på vej med et

kateter, som er et tyndt plastikrør til indførsel i blæren via urinrøret. Denne procedure kan give let ubehag og eventuelt kortvarig mindre blødning fra slimhinderne.

Det kontraststof, der bruges til ultralydsskanningen, består overvejende af små luftbobler. Det er ikke farligt for kroppen. Der kan opstå milde, kortvarige bivirkninger som fx hovedpine, svimmelhed, ændret smags- og lugtesans. Dette ses hos 0,5-5 %. I meget sjældne tilfælde kan man udvikle en allergisk reaktion, når stoffet sprøjtes ind i blodårerne. Disse alvorlige reaktioner er beskrevet hos mindre end 1/16.500. Du vil derfor blive observeret i 20 minutter efter skanningen, for at se om der skulle opstå bivirkninger eller allergisk reaktion.

MR-skanningen kan godt føles som lang tid. Skanningen er larmende og du har derfor høreværn på. Der er *ingen* strålebelastning eller andre påvirkninger af kroppen forbundet med en MR-skanning.

### Dine prøvesvar

Ønsker du svar på de almindelige blod- og urinundersøgelser, kan du se det på [www.sundhed.dk](http://www.sundhed.dk). Svar på de ekstra blod- og urinundersøgelser i projektet vil ikke fremkomme her, da vi ikke kender betydningen af resultaterne endnu. Har svarene et alarmerende resultat, vil den behandlende læge få besked og vil vurdere, om det har betydning for din behandling.

Skanningsresultaterne vil være synlige for lægerne, der behandler dig, og indgå i deres vurdering og behandling. Hvis vi skulle opdage noget, der kunne give os mistanke om andre sygdomme (f.eks. kræft), vil vi via din læge kontakte dig og tilbyde yderligere udredning. Bidrager skanningerne ikke med viden, der ændrer på din behandling eller diagnose, hører du ikke nærmere til skanningsresultatet.

### Nytte ved projektet

Projektet er vigtigt for at vi fremadrettet kan gøre indlæggelsesforløbet for personer, der indlægges akut med mistanke om nyrebækkenbetændelse, bedre. Projektet vil have en afgørende betydning for praksis på akutafdelingerne, og formentlig hvilken type antibiotika lægen ordinerer. Et mere målrettet antibiotikaforbrug vil bidrage til reduktion af bakterier, der er modstandsdygtige over for antibiotika, og dermed sikre at infektioner i fremtiden også kan behandles med antibiotika.

For dig personligt, vil deltagelse ikke umiddelbart have en betydning for dit behandlingsforløb. Hvis der skulle ske at være nogle særlige komplikationer til din aktuelle sygdom relateret til nyrerne, vil vi dog med de ekstra skanninger formentlig hurtigere erkende dette.

### Udelukkelse fra undersøgelse

Du vil udgå af dele af projektet, hvis nogle af undersøgelserne mislykkes af fx tekniske grunde eller hvis din behandlende læge vurderer, at det er for risikabelt for dig at deltage.

### Adgang til projektets resultater

Projektets samlede resultater vil blive offentliggjort 2024 i videnskabelige tidsskrifter samt på sygehusenes hjemmesider. Resultater med relevans for beslutningstagere i sundhedsvæsenet vil blive offentliggjort i danske medier og tidsskrifter. Det sikres, at ingen deltagere kan genkendes i det, som offentliggøres. Har du interesse i at vide mere om projektets resultater, kan du efter offentliggørelse opsøge dem via <http://www.sygehussonderjylland.dk/wm521282>.



1  
2  
3  
4  
5  
6 *Vi håber, at du med denne information har fået tilstrækkeligt indblik i, hvad det vil sige at deltage i*  
7 *projektet, og at du føler dig rustet til at tage beslutningen om din eventuelle deltagelse. Hvis du vil*  
8 *vide mere, er du meget velkommen til at kontakte os. Information om dine rettigheder er vedlagt*  
9 *denne deltagerinformation sidst i dokumentet (Bilag 1).*

10  
11 *Hvis du beslutter dig for at deltage i projektet, vil vi bede dig om at underskrive*  
12 *samtykkeerklæringen. Du kan vælge om du vil give samtykke til hele projektet eller kun dele af*  
13 *projektet. Det er frivilligt at deltage i projektet, og du kan når som helst og uden at give en grund*  
14 *trække dit samtykke tilbage. Det vil ikke få konsekvenser for den videre behandling.*

15  
16  
17  
18  
19 *Yderligere oplysninger kan fås ved henvendelse til*

20  
21 Professor og overlæge Christian Backer Mogensen  
22 Fælles Akutmodtagelsen, Sygehus Sønderjylland  
23 Kresten Philipsens Vej 15 - 6200 Aabenraa  
24 [Christian.Backer.Mogensen@rsyd.dk](mailto:Christian.Backer.Mogensen@rsyd.dk)  
25 Tlf: 79971123  
26  
27  
28  
29  
30

### 31 **Initiativtagere til projektet**

32 *Projektet er primært udarbejdet i samarbejde mellem Akutafdeling, Biokemisk Afdeling og Mikrobiologisk Afdeling, og*  
33 *Radiologisk Afdeling på Sygehus Sønderjylland, Sygehus Lillebælt og Odense Universitets Hospital. Projektet er*  
34 *forankret på Sygehus Sønderjylland og Institut for Regional Sundhedsforskning på Syddansk Universitet, som er*  
35 *ansøgnings- og bevillingsansvarlige.*

### 36 **Økonomisk støtte til projektet**

37  
38 *Projektet har fået økonomisk støttet i form af ph.d. stipendiat fra Syddansk Universitet (1.650.000kr), ph.d.-*  
39 *stipendiat fra Sygehus Sønderjylland (4.800.000kr) samt støtte til drift fra Region Syddanmark (500.000kr).*  
40 *Forsøgsansvarlige har ingen økonomisk tilknytning til støttegivere eller andre interessenter i forsøget. Der vil ikke være*  
41 *en økonomisk kompensation til patienter, der deltager i projektet.*  
42  
43  
44  
45  
46  
47  
48  
49  
50  
51  
52  
53  
54  
55  
56  
57  
58  
59  
60

Participant information - Track C

Deltagerinformation om deltagelse i videnskabeligt forskningsprojekt for personer, der indlægges akut med mistanke om infektion

## Forbedret diagnostik af akutte infektioner

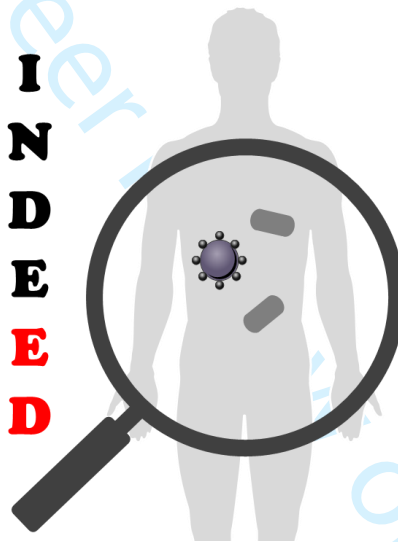

Infectious Diagnostics in Emergency Departments (INDEED study)

Et samarbejdsprojekt på tværs af specialer på Sygehus Sønderjylland, Sygehus Lillebælt og Odense Universitetshospital med udgangspunkt i Akutafdelingerne

1  
2  
3  
4  
5 *Vi vil spørge, om du vil deltage i et videnskabeligt projekt?*

6  
7 *Projektet handler om at blive bedre til at diagnosticere akutte infektioner på Akutafdelingen, så en*  
8 *målrettet behandling kan igangsættes så hurtigt som muligt.*

9  
10 *Før du beslutter, om du vil deltage i projektet, skal du fuldt ud forstå, hvad projektet går ud på, og*  
11 *hvorfor vi gennemfører det. Vi vil derfor bede dig om at læse denne deltagerinformation grundigt.*

12  
13 *Hvis du beslutter dig for at deltage, vil vi bede dig om at underskrive en samtykkeerklæring. Husk,*  
14 *at du har ret til at rådføre dig hos familie, venner eller bekendte. Du har også ret til betænkningstid*  
15 *før du underskriver, men da der er tale om en akut infektion, som kræver hurtig behandling, beder*  
16 *vi om, at du beslutter dig inden for 30 minutter.*

17  
18 *Det er frivilligt at deltage i projektet. Du kan når som helst og uden at give en grund trække dit*  
19 *samtykke tilbage. Hvis du trækker dit samtykke om deltagelse i projektet tilbage, vil det ikke få*  
20 *konsekvenser for din videre behandling.*

## 21 22 23 24 25 26 27 Projektets mål

28 De redskaber og undersøgelser, der eksisterer i dag til at finde ud af, hvilken type infektion, der er skyld i  
29 indlæggelsen på Akutmodtagelsen, har mange begrænsninger. Det udfordrer lægen i at stille en sikker  
30 diagnose inden for kort tid og igangsætte en målrettet behandling. Det kan få konsekvenser for den enkelte  
31 persons indlæggelsesforløb. Hvis man behandler med antibiotika som dækker flere bakterier end  
32 nødvendigt vil det også bidrage til udviklingen af bakterier, som er modstandsdygtige over for mange  
33 antibiotika.

34  
35  
36  
37 Projektet har derfor til formål at finde bedre redskaber, som kan hjælpe lægen til at stille en sikker  
38 diagnose inden for få timer for personer, indlagt akut med mistanke om infektion.

## 39 40 41 Det undersøger projektet

42  
43 Projektet vil undersøge

- 44 • hvilke symptomer, tegn og forhold, der kendetegner de forskellige typer af infektioner og  
45 sygdomsgraden
- 46 • hvilke markører for infektion i blodet, der bedst kan angive typen af infektion og sygdomsgraden
- 47 • om en ny metode til at måle bakterier i urinen er nyttig

## 48 49 50 51 Plan for projektet

52  
53 Projektet foregår på Fælles Akutmodtagelsen i Aabenraa, Sygehus Sønderjylland, på Akutafdelingen i  
54 Kolding, Sygehus Lillebælt, og på Fælle Akut Modtagelsen i Odense, Odense Universitetshospital. Fra  
55 februar 2021 til vinteren 2021/22 vil 1000 voksne personer, som indlægges akut med mistanke om  
56 infektion på de tre akutafdelinger, blive inviteret til at deltage.

1  
2  
3  
4 Personalet vil i forbindelse med din indlæggelse opsøge og informere dig om projektet, og tilbyde  
5 deltagelse i projektet. Da det er vigtigt at en akut infektion bliver behandlet hurtigt, vil vi bede dig om at  
6 tilkendegive din beslutning inden for en halv time.  
7  
8

### 9 Det indebærer deltagelse i projektet for dig

10 Deltagelse i projektet betyder, at du vil modtage den normale behandling, afdelingen tilbyder, og  
11 derudover få foretaget ekstra undersøgelser.  
12  
13

14 Vi vil stille dig nogle spørgsmål omkring dine symptomer, tidligere og aktuelle sygdomme, og hvordan du  
15 har det. Vi beder i den forbindelse adgang til din patientjournal, for at følge op på eventuelle tidligere  
16 indlæggelser, den aktuelle indlæggelse, og eventuelle indlæggelser inden for den næste måned efter du er  
17 udskrevet.  
18  
19

20 Vi vil tage 14mL ekstra blod svarende til 2 ekstra rør, når du alligevel får taget blodprøve, og hjælpe dig med  
21 at aflevere en urinprøve.  
22  
23

24 Det blod og urin, der indhentes til projektet, vil blive destrueret, når projektet er afsluttet.  
25

26 Dit samtykke vil give den forsøgsansvarlige, sponsor og denne repræsentant direkte adgang til relevante  
27 helbredsoplysninger i journalen for at kunne gennemføre, overvåge og kontrollere projektet. I projektet vil  
28 behandlingen af personoplysninger følge databeskyttelsesloven og databeskyttelsesforordningen. Efter  
29 indsamling af de ønskede informationer vil dine persondata blive fjernet fra vores registreringsystem, og  
30 dit personnummer vil blive erstattet af en kode (pseudo-anonymisering).  
31  
32

### 33 Bivirkninger, risici, komplikationer og ulemper

34 Der er ingen eller kun få kendte risici eller bivirkninger ved at deltage i projektet. Alle  
35 prøvetagningsmetoder er velkendte og almindeligt anvendte procedurer, som vi har stor erfaring med og  
36 kendskab til. Der kan dog være risici ved undersøgelserne, som vi endnu ikke kender. Vi beder dig derfor  
37 om at fortælle, hvis du oplever problemer i forbindelse med prøvetagning og undersøgelser. Hvis vi  
38 opdager bivirkninger, som vi ikke allerede har fortalt dig om, vil du naturligvis blive orienteret med det  
39 samme, og du vil skulle tage stilling til, om du ønsker at fortsætte med prøvetagning og undersøgelser.  
40  
41  
42  
43

44 De ekstra blodprøver til projektet tages i forbindelse med de blodprøver, der alligevel tages ved  
45 indlæggelse. Risici og bivirkninger ved at få taget en blodprøve kan være ubehageligt, lette smerter  
46 og/eller blå mærker, og i nogle tilfælde besvimelse. I sjældne tilfælde kan der opstå en mindre  
47 blodansamling eller betændelse ved indstiksstedet.  
48  
49

50 Urinprøven kan som regel afleveres i et bæger, opsamlet ved toiletbesøg. Er du kateterbærer eller på grund  
51 af sygdom ikke selv kan lade vandet, kan det blive nødvendigt at hjælpe vandladningen på vej med et  
52 kateter, som er et tyndt plastikrør til indførsel i blæren via urinrøret. Denne procedure kan give let ubehag  
53 og eventuelt kortvarig mindre blødning fra slimhinderne.  
54  
55  
56  
57  
58  
59  
60

## Dine prøvesvar

Ønsker du svar på de almindelige blod- og urinundersøgelser, kan du se det på [www.sundhed.dk](http://www.sundhed.dk). Svar på de ekstra blod- og urinundersøgelser i projektet vil ikke fremkomme her, da vi ikke kender betydningen af resultaterne endnu. Har svarene et alarmerende resultat, vil den behandlende læge få besked og vil vurdere, om det har betydning for din behandling.

## Nytte ved projektet

Projektet er vigtigt for at vi fremadrettet kan gøre indlæggelsesforløbet for personer, der indlægges akut med mistanke om infektion, bedre. Projektet vil have en afgørende betydning for praksis på akutafdelingerne, og formentligt hvilken type antibiotika lægen ordinerer. Et mere målrettet antibiotikaforbrug vil bidrage til reduktion af bakterier, der er modstandsdygtige over for antibiotika, og dermed sikre at infektioner i fremtiden også kan behandles med antibiotika.

For dig personligt, vil deltagelse ikke have en betydning for dit behandlingsforløb, da resultaterne af undersøgelserne først vil blive evalueret når projektet er afsluttet på akutafdelingen.

## Udelukkelse fra undersøgelse

Du vil udgå af dele af projektet, hvis nogle af undersøgelserne mislykkes af fx tekniske grunde

## Adgang til projektets resultater

Projektets samlede resultater vil blive offentliggjort 2024 i videnskabelige tidsskrifter samt på sygehusenes hjemmesider. Resultater med relevans for beslutningstagere i sundhedsvæsenet vil blive offentliggjort i danske medier og tidsskrifter. Det sikres, at ingen deltagere kan genkendes i det, som offentliggøres. Har du interesse i at vide mere om projektets resultater, kan du efter offentliggørelse opsøge dem via <http://www.sygehussonderjylland.dk/wm521282>.

*Vi håber, at du med denne information har fået tilstrækkeligt indblik i, hvad det vil sige at deltage i projektet, og at du føler dig rustet til at tage beslutningen om din eventuelle deltagelse. Hvis du vil vide mere, er du meget velkommen til at kontakte os. Information om dine rettigheder er vedlagt denne deltagerinformation sidst i dokumentet (Bilag 1).*

*Hvis du beslutter dig for at deltage i projektet, vil vi bede dig om at underskrive samtykkeerklæringen. Du kan vælge om du vil give samtykke til hele projektet eller kun dele af projektet. Det er frivilligt at deltage i projektet, og du kan når som helst og uden at give en grund trække dit samtykke tilbage. Det vil ikke få konsekvenser for den videre behandling.*

*Yderligere oplysninger kan fås ved henvendelse til*

Professor og overlæge Christian Backer Mogensen  
Fælles Akutmodtagelsen, Sygehus Sønderjylland  
Kresten Philipsens Vej 15 - 6200 Aabenraa  
[Christian.Backer.Mogensen@rsyd.dk](mailto:Christian.Backer.Mogensen@rsyd.dk)  
Tlf: 79971123

**Initiativtagere til projektet**

Projektet er primært udarbejdet i samarbejde mellem Akutafdeling, Biokemisk Afdeling og Mikrobiologisk Afdeling, og Radiologisk Afdeling på Sygehus Sønderjylland, Sygehus Lillebælt og Odense Universitets Hospital. Projektet er forankret på Sygehus Sønderjylland og Institut for Regional Sundhedsforskning på Syddansk Universitet, som er ansøgnings- og bevillingsansvarlige.

**Økonomisk støtte til projektet**

Projektet har fået økonomisk støttet i form af ph.d. stipendiat fra Syddansk Universitet (1.650.000kr), ph.d.-stipendiat fra Sygehus Sønderjylland (4.800.000kr) samt støtte til drift fra Region Syddanmark (500.000kr). Forsøgsansvarlige har ingen økonomisk tilknytning til støtteeivere eller andre interessenter i forsøget. Der vil ikke være en økonomisk kompensation til patienter, der deltager i projektet.

## Bilag 1: Forsøgspersoners rettigheder i et sundhedsvidenskabeligt forskningsprojekt

Som deltager i et sundhedsvidenskabeligt forskningsprojekt skal du vide, at:

- din deltagelse i forskningsprojektet er helt frivillig og kun kan ske efter, at du har fået både skriftlig og mundtlig information om forskningsprojektet og underskrevet samtykkeerklæringen.
- du til enhver tid mundtligt, skriftligt eller ved anden klar tilkendegivelse kan trække dit samtykke til deltagelse tilbage og udtræde af forskningsprojektet. Såfremt du trækker dit samtykke tilbage påvirker dette ikke din ret til nuværende eller fremtidig behandling eller andre rettigheder, som du måtte have.
- du har ret til at tage et familiemedlem, en ven eller en bekendt med til informations samtalen.
- du har ret til betænkningstid, før du underskriver samtykkeerklæringen.
- oplysninger om dine helbredsforhold, øvrige rent private forhold og andre fortrolige oplysninger om dig, som fremkommer i forbindelse med forskningsprojektet, er omfattet af tavshedspligt. Behandling af oplysninger om dig, herunder oplysninger i dine blodprøver og væv, sker efter reglerne i databeskyttelsesforordningen, databeskyttelsesloven samt sundhedsloven. Den dataansvarlige i forsøget skal orientere dig nærmere om dine rettigheder efter databeskyttelsesreglerne.
- der er mulighed for at få aktindsigt i forsøgsprotokoller efter offentlighedslovens bestemmelser. Det vil sige, at du kan få adgang til at se alle papirer vedrørende forsøgets tilrettelæggelse, bortset fra de dele, som indeholder forretningshemmeligheder eller fortrolige oplysninger om andre.
- der er mulighed for at klage og få erstatning efter reglerne i lov om klage- og erstatningsadgang inden for sundhedsvæsenet. Hvis der under forsøget skulle opstå en skade kan du henvende dig til Patienterstatningen, se nærmere på [www.patienterstatningen.dk](http://www.patienterstatningen.dk).

Dette tillæg er udarbejdet af det Videnskabetiske komitésystem og kan vedhæftes den skriftlige information om det sundhedsvidenskabelige forskningsprojekt. Spørgsmål til et konkret projekt skal rettes til projektets forsøgsansvarlige. Generelle spørgsmål til forsøgspersoners rettigheder kan rettes til den komité, som har godkendt projektet.

Revideret 21. september 2019



Written consent form – track A, B, and C

*Informeret samtykke til at deltage i et sundhedsvidenskabeligt projekt*

**Forbedret diagnostik af akutte infektioner**  
**- Infectious Diseases in Emergency Departments (INDEED study)**

**Erklæring fra forsøgspersonen:**

Jeg har fået skriftlig og mundtlig information, og jeg ved nok om formål, metode, fordele og ulemper til at sige ja til at deltage.

Jeg ved, at det er frivilligt at deltage, og jeg altid kan trække mit samtykke tilbage uden at miste mine nuværende eller fremtidige rettigheder til behandling.

Jeg giver hermed samtykke til at deltage i projektet og har fået en kopi af dette samtykkeark samt en kopi af den skriftlige information om projektet til eget brug.

Forsøgspersonens navn: \_\_\_\_\_

Forsøgspersonens Cpr-nummer: \_\_\_\_\_

Dato: \_\_\_\_\_ Underskrift: \_\_\_\_\_

Hvis der kommer nye væsentlige helbredsoplysninger frem om dig i forskningsprojektet vil du blive informeret. Vil du **frabede** dig information om nye væsentlige helbredsoplysninger, som kommer frem i forskningsprojektet, bedes du markere her: \_\_\_\_\_ (sæt x)

**Erklæring fra den, der afgiver information:**

Jeg erklærer, at forsøgspersonen har modtaget mundtlig og skriftlig information om forsøget.

Efter min overbevisning er der givet tilstrækkelig information til, at der kan træffes beslutning om deltagelse i forsøget.

Navnet på den, der har afgivet information:

Dato: \_\_\_\_\_ Underskrift: \_\_\_\_\_

Appendix II - Biological specimens

In this study, blood will be collected for analysis of serum procalcitonin (PCT) and Serum soluble urokinase plasminogen activator receptor (suPAR) and for a research biobank to store blood until analysis is feasible.

|                        | Blood for analysis of PCT and suPAR                                                                                                                                                                                                                                                                                                                                                                                                                                                                                                                                                                                                                                                                                                                                                                                                                                                                                                                                                                                   | Blood for research biobank                                                                                                                                                                                                                 |
|------------------------|-----------------------------------------------------------------------------------------------------------------------------------------------------------------------------------------------------------------------------------------------------------------------------------------------------------------------------------------------------------------------------------------------------------------------------------------------------------------------------------------------------------------------------------------------------------------------------------------------------------------------------------------------------------------------------------------------------------------------------------------------------------------------------------------------------------------------------------------------------------------------------------------------------------------------------------------------------------------------------------------------------------------------|--------------------------------------------------------------------------------------------------------------------------------------------------------------------------------------------------------------------------------------------|
| <b>Collection</b>      | The blood will be collected in an EDTA plasma tube.                                                                                                                                                                                                                                                                                                                                                                                                                                                                                                                                                                                                                                                                                                                                                                                                                                                                                                                                                                   | Biobank blood is only collected for patient in track A and includes one tube of EDTA plasma and one tube of LiHeparin plasma.                                                                                                              |
| <b>Storage</b>         | <p>At two of the sites, the analysis will be performed within is tested within two hours from the collection of the blood sample. At the third site, samples will be stored locally in a -80 °C freezer.</p> <p>The samples are pseudonymized with a code to protect the identity of the participants. All samples and code lists are stored safely and separately to prevent unauthorized access.</p>                                                                                                                                                                                                                                                                                                                                                                                                                                                                                                                                                                                                                | All samples will be stored locally in a -80 °C freezer. The samples are pseudonymized with a code to protect the identity of the participants. All samples and code lists are stored safely and separately to prevent unauthorized access. |
| <b>Sample analysis</b> | <p><i>Serum procalcitonin (PCT)</i></p> <p>Serum PCT concentration is quantified with an automated sandwich immunoassay “ECLIA” (Elecsys®, BRAHMS PCT-analyses) on Cobas e801. Calibration is performed after Cobas e pack has been registered in the instrument and is standardized to the BRAHMS PCT LIA assay. The correlation of Elecsys BRAHMS PCT analyses has been compared to BRAHMS PCT LIA and to BRAHMS PCT sensitive KRYPTOR with similar results of r=0.981 and r=0.988 respectively.</p> <p>Quality control is performed after each calibration and regularly following the standard procedure. The manufacture states a lower limit of detection 0.02 µg/L up to 100 µg/L. The functional assay sensitivity is identified at ≤ 0.06 ng/mL. In this study a range from 0.06 µg/L to 100 µg/L will be measured. Normal healthy individuals have a PCT concentration &lt; 0.1 µg/L. All plasma samples are screened for potential interfering substances like bilirubin, hemoglobin and lipids and no</p> | Molecular analysis for future use in ancillary studies will take place after all samples have been collected.                                                                                                                              |

|  |                                                                                                                                                                                                                                                                                                                                                                                                                                                                                                                                                                                                                                                                                                                                                                                                                                                                                                                                                                                                                                                                                                                                                                                                                                                                                                                                                                                                                                                                                                                                                                                                                                                                                                                                                                                         |  |
|--|-----------------------------------------------------------------------------------------------------------------------------------------------------------------------------------------------------------------------------------------------------------------------------------------------------------------------------------------------------------------------------------------------------------------------------------------------------------------------------------------------------------------------------------------------------------------------------------------------------------------------------------------------------------------------------------------------------------------------------------------------------------------------------------------------------------------------------------------------------------------------------------------------------------------------------------------------------------------------------------------------------------------------------------------------------------------------------------------------------------------------------------------------------------------------------------------------------------------------------------------------------------------------------------------------------------------------------------------------------------------------------------------------------------------------------------------------------------------------------------------------------------------------------------------------------------------------------------------------------------------------------------------------------------------------------------------------------------------------------------------------------------------------------------------|--|
|  | <p>results will be included with significant interference. There is no hook-effect in PCT concentrations measured up to 1000 µg/L.</p> <p>The precision of PCT assay is expected to be &lt;3% CV or similar. This is estimated from the internal quality controls using PC PCT1 (lot.419495) and PC PCT2 (lot.419497) at target PCT levels 0.49 and 9.44 ng/L showing a precision of 2.67 % CV and 2.63 % CV, respectively.</p>                                                                                                                                                                                                                                                                                                                                                                                                                                                                                                                                                                                                                                                                                                                                                                                                                                                                                                                                                                                                                                                                                                                                                                                                                                                                                                                                                         |  |
|  | <p><i>Serum soluble urokinase plasminogen activator receptor (suPAR)</i></p> <p>Serum suPAR is measured using suPARnostic® Tubilatex assay reagents (validated on Cobas® c111) protocol for Cobas® c702 and c502 applying the Multi-Pack cassettes (Roche Diagnostics, Mannheim, Germany) (42). Calibration is performed at least once a month or in connection to a new batch of TurbiLatex reagents, after calibration a quality control is performed.</p> <p>Measure range of the suPARnostic® Tubilatex assay is 1.8 µg/L to 16.0 µg/L on Cobas® c502 analyzer. The assay's limit of blank, limit of detection and limit of quantification are 1.0 µg/L, 1.2 µg/L and 1.2 µg/L respectively. Expected values for patients attending ED's range from 3-6 µg/L and can reach double digits in patients with severe disease related to poor prognosis. High concentration of SuPAR above 20 µg/L may be false positive results related with interference used by high concentration of hemoglobin, lipids or bilirubin. There is no identified interference in concentrations of bilirubin &gt;350 µmol/L, triglycerides &gt; 3.3g/L, hemoglobin &gt; 1.4 g/L or rheumatoid factor &gt; 440 IU/mL. The highest concentration of suPAR is tested at 47.5 µg/L without hook-effect and the linearity is from 1.8 µg/L to 26.6 µg/L. The mean value of precision of the test is 3.4 µg/L, 7.1 µg/L, 10.2 µg/L for low, middle and high concentrations of SuPAR respectively. The accuracy of suPARnostic® Tubilatex is compared with suPARnostic® ELISA with similar results &lt; 15 % of difference.</p> <p>The precision of suPAR assay is expected to be &lt; 5% CV or similar. This is estimated from external quality assessment material, HK 19 (Product code 2226 DK, Lot. No.</p> |  |

1  
2  
3  
4  
5  
6  
7  
8  
9  
10  
11  
12  
13  
14  
15  
16  
17  
18  
19  
20  
21  
22  
23  
24  
25  
26  
27  
28  
29  
30  
31  
32  
33  
34  
35  
36  
37  
38  
39  
40  
41  
42  
43  
44  
45  
46

|                   |                                                                                                                                                                                                                                          |                                                                                                                                                                                                                                                                                                                                         |
|-------------------|------------------------------------------------------------------------------------------------------------------------------------------------------------------------------------------------------------------------------------------|-----------------------------------------------------------------------------------------------------------------------------------------------------------------------------------------------------------------------------------------------------------------------------------------------------------------------------------------|
|                   | 201808) analyzed repeatedly during five different days on c502 and c702 and the mean content of suPAR determined by turbidimetry was 2.15 mg/ L and 2.03 mg/L (CV% 4.56 and 5.52) for the Cobas c502 and c702 instruments, respectively. |                                                                                                                                                                                                                                                                                                                                         |
| <b>Evaluation</b> | The results will be saved in a study database and not be visible for the physician in the medical journal.                                                                                                                               | The results will be saved in a study database.<br><br>The expiry date of the research biobank is expected to be October 2022. After expiry date, the remaining material in the research bank will be destroyed.                                                                                                                         |
| <b>Location</b>   | Samples will be located at Bloodsamples, Biochemistry and Immunology, University Hospital of Southern Denmark, Aabenraa, Denmark                                                                                                         | Samples will be located at:<br><br>- Bloodsamples, Biochemistry and Immunology, University Hospital of Southern Denmark, Aabenraa, Denmark<br><br>- Biochemistry and Immunology, University Hospital of Southern Denmark, Kolding, Denmark<br><br>- Clinical Biochemistry and Pharmacology, Odense University Hospital, Odense, Denmark |

## Appendix III - Schedule of enrollment, interventions and assessments

|                                   | STUDY PERIOD |            |                 |     |      |      |     |     |      |           |     |
|-----------------------------------|--------------|------------|-----------------|-----|------|------|-----|-----|------|-----------|-----|
|                                   | RECRUITMENT  | ALLOCATION | POST-ALLOCATION |     |      |      |     |     |      | CLOSE-OUT |     |
| TIMEPOINT<br>(h=hours, d=days)    | -½h          | 0h         | <1h             | <4h | <24h | <48h | <5d | <7d | <14d | 30d       | 90d |
| <b>ENROLMENT</b>                  |              |            |                 |     |      |      |     |     |      |           |     |
| Eligibility screen                | x            |            |                 |     |      |      |     |     |      |           |     |
| Informed consent                  | x            |            |                 |     |      |      |     |     |      |           |     |
| Physician assessment              | x            |            |                 |     |      |      |     |     |      |           |     |
| Allocation                        |              | x          |                 |     |      |      |     |     |      |           |     |
| <b>INTERVENTIONS – all tracks</b> |              |            |                 |     |      |      |     |     |      |           |     |
| Collection of blood sample        |              |            | x               |     |      |      |     |     |      |           |     |
| • PCT analysis                    |              |            |                 |     |      |      |     |     | x    |           |     |
| • suPAR analysis                  |              |            |                 |     |      |      |     |     | x    |           |     |
| Collection of urine sample        |              |            |                 | x   |      |      |     |     |      |           |     |

|                                                                                        |  |  |  |   |   |   |  |  |   |  |  |
|----------------------------------------------------------------------------------------|--|--|--|---|---|---|--|--|---|--|--|
| • POC-UFC analysis                                                                     |  |  |  | x |   |   |  |  |   |  |  |
| <b>INTERVENTIONS – track A</b>                                                         |  |  |  |   |   |   |  |  |   |  |  |
| Collection of sputum sample                                                            |  |  |  | x |   |   |  |  |   |  |  |
| • POC-PCR analysis and presented to the treating physician                             |  |  |  |   | x |   |  |  |   |  |  |
| POC-US                                                                                 |  |  |  |   |   | x |  |  |   |  |  |
| ULDCT and HRCT                                                                         |  |  |  |   |   | x |  |  |   |  |  |
| <b>INTERVENTIONS – track B</b>                                                         |  |  |  |   |   |   |  |  |   |  |  |
| CEUS                                                                                   |  |  |  |   |   | x |  |  |   |  |  |
| POC-US                                                                                 |  |  |  |   |   | x |  |  |   |  |  |
| MRI                                                                                    |  |  |  |   |   | x |  |  |   |  |  |
| <b>ASSESSMENTS</b>                                                                     |  |  |  |   |   |   |  |  |   |  |  |
| Collection of patient characteristic (patient interview and look up in medical record) |  |  |  |   | x |   |  |  |   |  |  |
| CRP results                                                                            |  |  |  |   | x |   |  |  |   |  |  |
| Dipstick result                                                                        |  |  |  |   | x |   |  |  |   |  |  |
| Urine routine culturing result                                                         |  |  |  |   |   |   |  |  | x |  |  |

1  
2  
3  
4  
5  
6  
7  
8  
9  
10  
11  
12  
13  
14  
15  
16  
17  
18  
19  
20  
21  
22  
23  
24  
25  
26  
27  
28  
29  
30  
31  
32  
33  
34  
35  
36  
37  
38  
39  
40  
41  
42  
43  
44  
45  
46

|                                         |  |  |  |   |  |   |   |   |  |  |   |
|-----------------------------------------|--|--|--|---|--|---|---|---|--|--|---|
| Sputum routine culturing and PCR result |  |  |  |   |  |   |   | x |  |  |   |
| Antibiotic prescription                 |  |  |  | x |  | x | x |   |  |  |   |
| Expert panel reference standard         |  |  |  |   |  |   |   | x |  |  |   |
| Length of stay                          |  |  |  |   |  |   |   |   |  |  | x |
| Mortality                               |  |  |  |   |  |   |   |   |  |  | x |
| Admission to ICU and readmission        |  |  |  |   |  |   |   |   |  |  | x |

For peer review only

1  
2  
3  
4  
5  
6  
7  
8  
9  
10  
11  
12  
13  
14  
15  
16  
17  
18  
19  
20  
21  
22  
23  
24  
25  
26  
27  
28  
29  
30  
31  
32  
33  
34  
35  
36  
37  
38  
39  
40  
41  
42  
43  
44  
45  
46



## Appendix IV - Targets in POC-PCR

The BIOFIRE® FILMARRAY® Pneumonia plus Panel is testing for 27 of the most common pathogens involved in Lower respiratory tract infections and 7 genetic markers of antibiotic resistance.

| Bacteria (semi quantitative)                         | Antibiotic Resistance Genes  |
|------------------------------------------------------|------------------------------|
| <i>Acinetobacter calcoaceticus-baumannii</i> complex | <b>ESBL</b>                  |
| <i>Enterobacter cloacae</i>                          | CTX-M                        |
| <i>Escherichia coli</i>                              |                              |
| <i>Haemophilus influenzae</i>                        | <b>Carbapenemases</b>        |
| <i>Klebsiella aerogenes</i>                          | KPC                          |
| <i>Klebsiella oxytoca</i>                            | NDM                          |
| <i>Klebsiella pneumoniae</i> group                   | Oxa48-like                   |
| <i>Moraxella catarrhalis</i>                         | VIM                          |
| <i>Proteus</i> spp.                                  | IMP                          |
| <i>Pseudomonas aeruginosa</i>                        |                              |
| <i>Serratia marcescens</i>                           | <b>Methicilin Resistance</b> |
| <i>Staphylococcus aureus</i>                         | mecA/mecC and MREJ           |
| <i>Streptococcus agalactiae</i>                      |                              |
| <i>Streptococcus pneumoniae</i>                      |                              |
| <i>Streptococcus pyogenes</i>                        |                              |

| Atypical Bacteria (Qualitative) | Viruses                                                 |
|---------------------------------|---------------------------------------------------------|
| <i>Legionella pneumophila</i>   | Influenza A                                             |
| <i>Mycoplasma pneumoniae</i>    |                                                         |
| <i>Chlamydia pneumoniae</i>     | Influenza B                                             |
|                                 | Adenovirus                                              |
|                                 | Coronavirus                                             |
|                                 | Parainfluenza virus                                     |
|                                 | Respiratory Syncytial virus                             |
|                                 | Human Rhinovirus/Enterovirus                            |
|                                 | Human Metapneumovirus                                   |
|                                 | Middle East Respiratory Syndrome Coronavirus (MERS-CoV) |

## Appendix V – recommended action list

# Guidance of results from POC-PCR *FilmArray® Pneumonia Panel plus*

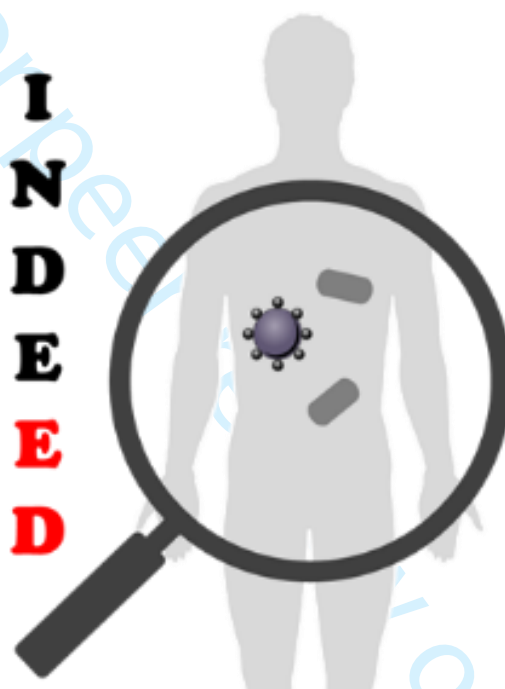

This guidance is developed to the INDEED-study (Infectious diseases in Emergency Department).

Emergency department physicians from Hospital Sønderjylland in Aabenraa, Hospital Lillebælt in Kolding, and Odense University Hospital in Odense, will receive this action card along with the results from sputum sample analyses.

In case of doubt in the interpretation of the results, the physician is encouraged to contact the local clinical microbiologist.

| Agens                                                        | Association with CAP#        | Remarks                                                                                                                                                                       | Antibiotics                                                                                                                                                       |                                                                                                                |
|--------------------------------------------------------------|------------------------------|-------------------------------------------------------------------------------------------------------------------------------------------------------------------------------|-------------------------------------------------------------------------------------------------------------------------------------------------------------------|----------------------------------------------------------------------------------------------------------------|
|                                                              |                              |                                                                                                                                                                               | First choice                                                                                                                                                      | Penicillin allergy                                                                                             |
| <i>Streptococcus pneumoniae</i> *                            | Frequent and likely pathogen | Part of the normal microbiota in upper respiratory tract.                                                                                                                     | Benzylpenicillin 1.2g (2 mill.IE) x4 i.v.<br><i>or</i><br>Phenoxymethylpenicillin 0.6g (1 mill.IE) x4 oral                                                        | Cefuroxime 1.5g x 3 i.v.<br><i>or</i><br>Roxithromycin 300mg x1 oral                                           |
| <i>Haemophilus influenzae</i> *                              | Frequent and likely pathogen | May be contamination with pharyngeal microbiota.                                                                                                                              | Ampicillin 2g x4 i.v.<br><i>or</i><br>Benzylpenicillin 1.2g (2 mill. IE) x4 i.v.<br><i>or</i><br>Piv-ampicillin 1g x3 oral<br><i>or</i><br>Amoxicillin 1g x3 oral | Cefuroxime 1.5g x 3 i.v.<br><i>or</i><br>Doxycycline 100mg x2 first 24 hours oral followed by 100mg x1 oral    |
| <i>Streptococcus pyogenes</i> *                              | Probable, but rare phatogen  | Part of the normal microbiota in upper respiratory tract.                                                                                                                     | Benzylpenicillin 1.2g (2 mill. IE) x4 i.v.                                                                                                                        | Cefuroxime 1.5g x3 i.v.                                                                                        |
| <i>Streptococcus agalactiae</i> *                            | Rare phatogen in adults      | These pathogens relatively often represent contamination with pharyngeal microbiota.                                                                                          | Benzylpenicillin 1.2g (2 mill. IE) x4 i.v.                                                                                                                        | Cefuroxime 1.5g x3 i.v.                                                                                        |
| <i>Staphylococcus aureus</i> *                               | Probable, but rare phatogen  | Infection caused by <i>Streptococcus pyogenes</i> or <i>Staphylococcus aureus</i> will usually results in severe pneumonia.                                                   | Cloxacillin 1g x4 i.v.                                                                                                                                            | Cefuroxime 1.5g x3 i.v.                                                                                        |
| <i>Moraxella catarrhalis</i> *                               | Probrable phatogen           |                                                                                                                                                                               | Piperacillin-tazobactam 4/0.5g x3 i.v.<br><i>or</i><br>amoxicillin-clavulanic acid 500/125mg x3 oral                                                              | Cefuroxime 1.5g x3 i.v.<br><i>or</i><br>Roxithromycin 300mg x1 oral<br><i>or</i><br>Azithromycin 500mg x1 oral |
| <i>Legionella pneumophila</i><br><i>Mycoplasma pneumonia</i> | Likely causative phatogen    | Is not a part of the normal respiratory microbiota.                                                                                                                           |                                                                                                                                                                   | Azithromycin 500mg x1 i.v./oral                                                                                |
| <i>Chlamydia pneumoniae</i>                                  | Probrable causative phatogen | Is not a part of the normal respiratory microbiota<br>Will usually cause mild infections. In case of severe infection, other pathogens / superinfection should be considered. |                                                                                                                                                                   | Azithromycin 500mg x1 i.v./oral                                                                                |

| Agens                                                                                                                                                                                                                                                                                                                                   | Association with CAP <sup>#</sup>                                                                                                                                                                                                                                                    | Remarks                                                                                                                                                                                                   | Antibiotics                                                                                                                                       |
|-----------------------------------------------------------------------------------------------------------------------------------------------------------------------------------------------------------------------------------------------------------------------------------------------------------------------------------------|--------------------------------------------------------------------------------------------------------------------------------------------------------------------------------------------------------------------------------------------------------------------------------------|-----------------------------------------------------------------------------------------------------------------------------------------------------------------------------------------------------------|---------------------------------------------------------------------------------------------------------------------------------------------------|
| <i>Pseudomonas aeruginosa</i> *<br><i>Acinetobacter calcoaceticus-baumannii complex</i> *<br><i>Enterobacter cloacae</i> *<br><i>Escherichia coli</i> *<br><i>Klebsiella (Enterobacter) aerogenes</i> *<br><i>Klebsiella oxytoca</i> *<br><i>Klebsiella pneumoniae group</i> *<br><i>Proteus spp.</i> *<br><i>Serratia marcescens</i> * | Very rare causative pathogens                                                                                                                                                                                                                                                        | These findings usually represents colonization.                                                                                                                                                           | These findings should typically not lead to adjustment of empirical antimicrobial treatment.                                                      |
| Influenza A<br>Influenza B                                                                                                                                                                                                                                                                                                              | Frequent pathogens                                                                                                                                                                                                                                                                   | Is not a part of the normal respiratory microbiota Bacterial superinfection can occur.                                                                                                                    |                                                                                                                                                   |
| Parainfluenza virus<br>Respiratory Syncytial<br>Adenovirus<br>Coronavirus<br>(does not include SARS-CoV-2)<br>Human Rhinovirus/Enterovirus<br>Human Metapneumovirus                                                                                                                                                                     | Probable pathogens                                                                                                                                                                                                                                                                   | Usually causes mild infections. In case of severe infection, other pathogens / superinfection should be considered.<br><br>May be an accidental finding due to previous /recent / asymptomatic infection. | Consider whether the patient's pneumonia symptoms can be explained by viral infection, and whether antibiotic treatment is necessary / indicated. |
| Not detected<br>(POC-PCR(FilmArray) is negative)                                                                                                                                                                                                                                                                                        | A negative result does not rule out pneumonia, but means that CAP caused by the most common pathogens is less likely. Consider whether the pneumonia diagnosis is correct and consider investigation for rare causes of pneumonia (e.g. tuberculosis or <i>Chlamydia psittaci</i> ). |                                                                                                                                                                                                           |                                                                                                                                                   |

#CAP: Community-Acquired Pneumonia

\*: Concentration (copies/mL) is reported in the POC-PCR (FilmArray) result

Most bacterial causative pathogens of CAP are also part of the normal respiratory microbiota or may colonize the upper respiratory tract, and the clinical relevance of these findings must always be assessed carefully.

For the bacterial agents marked with “\*”, a concentration (copies/mL) is reported in the POC-PCR (FilmArray) result. There is a reasonable correlation between copies/mL and the culture-based measure “CFU/mL”, however, “copies/mL” is typically a factor of 10-100 higher than the corresponding “CFU/mL”.

The limits of significance are not well established and depend probably on the agent, the quality of the sample and the clinical context - and must therefore be used with caution. The Infectious Diseases Society of America and the American Society of Microbiology<sup>1</sup> propose the following culture-based limits for hospital-acquired pneumonia:

| Culture-based measure                    | POC-PCR (FilmArray) concentration            | Interpretation (caution)            |
|------------------------------------------|----------------------------------------------|-------------------------------------|
| < 10 <sup>4</sup> CFU/mL                 | ≈ < 10 <sup>5</sup> copies/mL                | Indicates mixture with normal flora |
| 10 <sup>4</sup> – 10 <sup>5</sup> CFU/mL | ≈ 10 <sup>5</sup> -10 <sup>6</sup> copies/mL | Gray zone                           |
| > 10 <sup>5</sup> CFU/mL                 | ≈ >10 <sup>6</sup> copies/mL                 | Indicates real findings             |

Developed by microbiologist Flemming Rosenvinge, Department of Clinical Microbiology, Odense University Hospital in Odense, and microbiologist Claus Østergaard, Department of Clinical Microbiology, Hospital Lillebælt in Kolding, Denmark

Version 1.1 – February 7th 2021

<sup>1</sup> Miller, J. M., Binnicker, M. J., Campbell, S., et al. A Guide to Utilization of the Microbiology Laboratory for Diagnosis of Infectious Diseases: 2018 Update by the Infectious Diseases Society of America and the American Society for Microbiology. *Clinical Infectious Diseases*, 67(6), e1–e94. <https://doi.org/10.1093/cid/ciy381>

## Appendix VI - Template for expert panel reference standard

The template for the expert panel reference standard is illustrated in the table:

| Main question                                                                                                                                                                                                                                                                                                                                                                                                            | Sub-question                                                                                                                                                                                                                                                                                                                                                          |
|--------------------------------------------------------------------------------------------------------------------------------------------------------------------------------------------------------------------------------------------------------------------------------------------------------------------------------------------------------------------------------------------------------------------------|-----------------------------------------------------------------------------------------------------------------------------------------------------------------------------------------------------------------------------------------------------------------------------------------------------------------------------------------------------------------------|
| Does the patient has an infection?<br><input type="checkbox"/> Yes <input type="checkbox"/> No                                                                                                                                                                                                                                                                                                                           | If yes, what was the focus of infection?<br><input type="checkbox"/> Respiratory <input type="checkbox"/> Urinary tract <input type="checkbox"/> Other                                                                                                                                                                                                                |
|                                                                                                                                                                                                                                                                                                                                                                                                                          | If yes, was the focus of infection identified within 48 hours?<br><input type="checkbox"/> Yes <input type="checkbox"/> No                                                                                                                                                                                                                                            |
| <i>If focus is respiratory infection</i>                                                                                                                                                                                                                                                                                                                                                                                 |                                                                                                                                                                                                                                                                                                                                                                       |
| What type of respiratory infection was the patient primarily hospitalized with?<br><input type="checkbox"/> Covid-19 pneumonia<br><input type="checkbox"/> CAP<br><input type="checkbox"/> COPD – exacerbation<br><input type="checkbox"/> Aspiration pneumonia<br><input type="checkbox"/> Other – please specify (by using a list of ICD-10 diagnosis): _____                                                          |                                                                                                                                                                                                                                                                                                                                                                       |
| <i>If focus is urinary tract infection (UTI)</i>                                                                                                                                                                                                                                                                                                                                                                         |                                                                                                                                                                                                                                                                                                                                                                       |
| What type of UTI was the patient primarily hospitalized with?<br><input type="checkbox"/> UTI without systemic effects (cystitis)<br><input type="checkbox"/> UTI with systemic effects (pyelonephritis/urosepsis)                                                                                                                                                                                                       | If UTI with systemic effects, please specify<br><input type="checkbox"/> Pyelonephritis (local symptoms + fever + increased CRP)<br><input type="checkbox"/> Urosepsis (UTI + 2 qSOFA or relevant bacteremia)<br><input type="checkbox"/> Cannot be further specified<br><input type="checkbox"/> Other – please specify (by using a list of ICD-10 diagnosis): _____ |
| <i>If focus of infection is other than respiratory and urinary tract infection</i>                                                                                                                                                                                                                                                                                                                                       |                                                                                                                                                                                                                                                                                                                                                                       |
| What type of infection was the patient primarily hospitalized with?<br><input type="checkbox"/> Unknown focus<br><input type="checkbox"/> Erysipelas<br><input type="checkbox"/> Tonsillitis<br><input type="checkbox"/> Gastroenteritis<br><input type="checkbox"/> Endocarditis<br><input type="checkbox"/> Meningitis<br><input type="checkbox"/> Other – please specify (by using a list of ICD-10 diagnosis): _____ |                                                                                                                                                                                                                                                                                                                                                                       |
| <input type="checkbox"/> Soft tissue abscess<br><input type="checkbox"/> Cholecystitis<br><input type="checkbox"/> Diverticulitis<br><input type="checkbox"/> Pancreatitis<br><input type="checkbox"/> Appendicitis                                                                                                                                                                                                      |                                                                                                                                                                                                                                                                                                                                                                       |

## Appendix VII - Algorithm for antibiotic treatment

The algorithm specifies if the antibiotic treatment is targeted or non-targeted. Targeted treatment is defined as narrow spectrum antibiotics directed against CAP, antibiotics directed against a detected respiratory pathogen or no antibiotics (e.g. in the absence of a bacterial pathogen and/or presence of a viral pathogen). Non-targeted treatment is defined as broad spectrum antibiotics not directed against a specific pathogen or antibiotics not directed against CAP.

Narrow spectrum antibiotics (NS) is defined in table 1. Targeted treatment (TT) for the different types of agents is defined in table 2. Treatment with other antibiotics (not listed as NS or TT in table 1 and 2) is classified non-targeted treatment (NT).

Table 1 Narrow spectrum antibiotics

| Antibiotic treatment – narrow spectrum     |                                                                                      |
|--------------------------------------------|--------------------------------------------------------------------------------------|
| No penicillin allergy                      | Penicillin allergy                                                                   |
| Benzylpenicillin<br>Phenoxyethylpenicillin | Benzylpenicillin<br>Phenoxyethylpenicillin<br>Clindamycin<br>Macrolide<br>Cefuroxime |

Table 2 Targeted treatment

| Agents                                                   | Antibiotic treatment - targeted                                                                                                                                     |                                                                                                                                                                     |
|----------------------------------------------------------|---------------------------------------------------------------------------------------------------------------------------------------------------------------------|---------------------------------------------------------------------------------------------------------------------------------------------------------------------|
|                                                          | No penicillin allergy                                                                                                                                               | Penicillin allergy                                                                                                                                                  |
| <i>Streptococcus pneumoniae, pyogenes, or agalactiae</i> | Benzylpenicillin<br>Phenoxyethylpenicillin                                                                                                                          | Benzylpenicillin<br>Phenoxyethylpenicillin<br>Clindamycin<br>Macrolide<br>Cefuroxime                                                                                |
| <i>H. influenzae</i>                                     | Benzylpenicillin<br>Ampicillin<br>Piv-ampicillin<br>Amoxicillin<br>Amoxicillin-clavulanate<br>Piperacillin/Tazobactam<br>Cefuroxime<br>Doxycycline<br>Ciprofloxacin | Benzylpenicillin<br>Ampicillin<br>Piv-ampicillin<br>Amoxicillin<br>Amoxicillin-clavulanate<br>Piperacillin/Tazobactam<br>Cefuroxime<br>Doxycycline<br>Ciprofloxacin |
| <i>Moraxella catarrhalis</i>                             | Amoxicillin-clavulanate<br>Piperacillin/Tazobactam<br>Cefuroxime or<br>Macrolide                                                                                    | Amoxicillin-clavulanate<br>Piperacillin/ Tazobactam<br>Cefuroxime<br>Macrolide                                                                                      |
| <i>Staphylococcus aureus</i>                             | Cloxacillin                                                                                                                                                         | Benzylpenicillin                                                                                                                                                    |



|                                                                |                                                                           |                                                                                                                              |
|----------------------------------------------------------------|---------------------------------------------------------------------------|------------------------------------------------------------------------------------------------------------------------------|
|                                                                | Dicloxacillin                                                             | Phenoxymethyl-penicillin<br>Macrolid<br>Cefuroxime<br>Cloxacillin<br>Dicloxacillin<br>Clindamycin<br>Macrolide<br>Cefuroxime |
| <i>Legionella pneumophila</i>                                  | Macrolide<br>Ciprofloxacin<br>Moxifloxacin<br>Doxycycline<br>Tetracycline | Macrolide<br>Ciprofloxacin<br>Moxifloxacin<br>Doxycycline<br>Tetracycline                                                    |
| <i>Mycoplasma pneumoniae</i> or<br><i>Chlamydia pneumoniae</i> | Macrolide<br>Moxifloxacin<br>Doxycycline<br>Tetracycline                  | Macrolide<br>Moxifloxacin<br>Doxycycline<br>Tetracycline                                                                     |

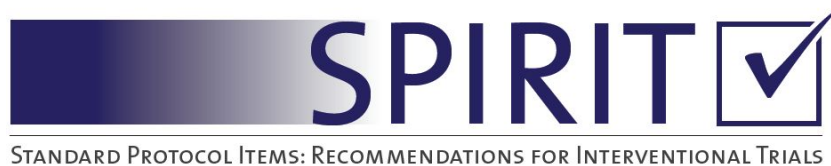

STANDARD PROTOCOL ITEMS: RECOMMENDATIONS FOR INTERVENTIONAL TRIALS

## Completed SPIRIT checklist

| Section/item                      | ItemNo | Description                                                                                                                                                                                                                                                                              | Page in protocol |
|-----------------------------------|--------|------------------------------------------------------------------------------------------------------------------------------------------------------------------------------------------------------------------------------------------------------------------------------------------|------------------|
| <b>Administrative information</b> |        |                                                                                                                                                                                                                                                                                          |                  |
| Title                             | 1      | Descriptive title identifying the study design, population, interventions, and, if applicable, trial acronym                                                                                                                                                                             | 1                |
| Trial registration                | 2a     | Trial identifier and registry name. If not yet registered, name of intended registry                                                                                                                                                                                                     | 3                |
|                                   | 2b     | All items from the World Health Organization Trial Registration Data Set                                                                                                                                                                                                                 | 3                |
| Protocol version                  | 3      | Date and version identifier                                                                                                                                                                                                                                                              | 17               |
| Funding                           | 4      | Sources and types of financial, material, and other support                                                                                                                                                                                                                              | 17               |
| Roles and responsibilities        | 5a     | Names, affiliations, and roles of protocol contributors                                                                                                                                                                                                                                  | 17               |
|                                   | 5b     | Name and contact information for the trial sponsor                                                                                                                                                                                                                                       | 3+18             |
|                                   | 5c     | Role of study sponsor and funders, if any, in study design; collection, management, analysis, and interpretation of data; writing of the report; and the decision to submit the report for publication, including whether they will have ultimate authority over any of these activities | 18               |
|                                   | 5d     | Composition, roles, and responsibilities of the coordinating centre, steering committee, endpoint adjudication committee, data management team, and other individuals or groups overseeing the trial, if applicable (see Item 21a for data monitoring committee)                         | 18               |
| <b>Introduction</b>               |        |                                                                                                                                                                                                                                                                                          |                  |
| Background and rationale          | 6a     | Description of research question and justification for undertaking the trial, including summary of relevant studies (published and unpublished) examining benefits and harms for each intervention                                                                                       | 6-7              |
|                                   | 6b     | Explanation for choice of comparators                                                                                                                                                                                                                                                    | 6-7              |
| Objectives                        | 7      | Specific objectives or hypotheses                                                                                                                                                                                                                                                        | 7-8              |

|    |                                                           |     |                                                                                                                                                                                                                                                                                                                                                                                |                |
|----|-----------------------------------------------------------|-----|--------------------------------------------------------------------------------------------------------------------------------------------------------------------------------------------------------------------------------------------------------------------------------------------------------------------------------------------------------------------------------|----------------|
| 1  |                                                           |     |                                                                                                                                                                                                                                                                                                                                                                                |                |
| 2  | Trial design                                              | 8   | Description of trial design including type of trial (eg, parallel group, crossover, factorial, single group), allocation ratio, and framework (eg, superiority, equivalence, noninferiority, exploratory)                                                                                                                                                                      | 8              |
| 3  |                                                           |     |                                                                                                                                                                                                                                                                                                                                                                                |                |
| 4  |                                                           |     |                                                                                                                                                                                                                                                                                                                                                                                |                |
| 5  |                                                           |     |                                                                                                                                                                                                                                                                                                                                                                                |                |
| 6  |                                                           |     |                                                                                                                                                                                                                                                                                                                                                                                |                |
| 7  |                                                           |     |                                                                                                                                                                                                                                                                                                                                                                                |                |
| 8  | <b>Methods: Participants, interventions, and outcomes</b> |     |                                                                                                                                                                                                                                                                                                                                                                                |                |
| 9  |                                                           |     |                                                                                                                                                                                                                                                                                                                                                                                |                |
| 10 | Study setting                                             | 9   | Description of study settings (eg, community clinic, academic hospital) and list of countries where data will be collected. Reference to where list of study sites can be obtained                                                                                                                                                                                             | 8              |
| 11 |                                                           |     |                                                                                                                                                                                                                                                                                                                                                                                |                |
| 12 |                                                           |     |                                                                                                                                                                                                                                                                                                                                                                                |                |
| 13 |                                                           |     |                                                                                                                                                                                                                                                                                                                                                                                |                |
| 14 | Eligibility criteria                                      | 10  | Inclusion and exclusion criteria for participants. If applicable, eligibility criteria for study centres and individuals who will perform the interventions (eg, surgeons, psychotherapists)                                                                                                                                                                                   | 8-9            |
| 15 |                                                           |     |                                                                                                                                                                                                                                                                                                                                                                                |                |
| 16 |                                                           |     |                                                                                                                                                                                                                                                                                                                                                                                |                |
| 17 |                                                           |     |                                                                                                                                                                                                                                                                                                                                                                                |                |
| 18 |                                                           |     |                                                                                                                                                                                                                                                                                                                                                                                |                |
| 19 | Interventions                                             | 11a | Interventions for each group with sufficient detail to allow replication, including how and when they will be administered                                                                                                                                                                                                                                                     | 9-11           |
| 20 |                                                           |     |                                                                                                                                                                                                                                                                                                                                                                                |                |
| 21 |                                                           |     |                                                                                                                                                                                                                                                                                                                                                                                |                |
| 22 |                                                           | 11b | Criteria for discontinuing or modifying allocated interventions for a given trial participant (eg, drug dose change in response to harms, participant request, or improving/worsening disease)                                                                                                                                                                                 | 15             |
| 23 |                                                           |     |                                                                                                                                                                                                                                                                                                                                                                                |                |
| 24 |                                                           |     |                                                                                                                                                                                                                                                                                                                                                                                |                |
| 25 |                                                           |     |                                                                                                                                                                                                                                                                                                                                                                                |                |
| 26 |                                                           | 11c | Strategies to improve adherence to intervention protocols, and any procedures for monitoring adherence (eg, drug tablet return, laboratory tests)                                                                                                                                                                                                                              | 12             |
| 27 |                                                           |     |                                                                                                                                                                                                                                                                                                                                                                                |                |
| 28 |                                                           |     |                                                                                                                                                                                                                                                                                                                                                                                |                |
| 29 |                                                           |     |                                                                                                                                                                                                                                                                                                                                                                                |                |
| 30 |                                                           |     |                                                                                                                                                                                                                                                                                                                                                                                |                |
| 31 |                                                           | 11d | Relevant concomitant care and interventions that are permitted or prohibited during the trial                                                                                                                                                                                                                                                                                  | 7-8            |
| 32 |                                                           |     |                                                                                                                                                                                                                                                                                                                                                                                |                |
| 33 |                                                           |     |                                                                                                                                                                                                                                                                                                                                                                                |                |
| 34 | Outcomes                                                  | 12  | Primary, secondary, and other outcomes, including the specific measurement variable (eg, systolic blood pressure), analysis metric (eg, change from baseline, final value, time to event), method of aggregation (eg, median, proportion), and time point for each outcome. Explanation of the clinical relevance of chosen efficacy and harm outcomes is strongly recommended | 12-15          |
| 35 |                                                           |     |                                                                                                                                                                                                                                                                                                                                                                                |                |
| 36 |                                                           |     |                                                                                                                                                                                                                                                                                                                                                                                |                |
| 37 |                                                           |     |                                                                                                                                                                                                                                                                                                                                                                                |                |
| 38 |                                                           |     |                                                                                                                                                                                                                                                                                                                                                                                |                |
| 39 |                                                           |     |                                                                                                                                                                                                                                                                                                                                                                                |                |
| 40 |                                                           |     |                                                                                                                                                                                                                                                                                                                                                                                |                |
| 41 |                                                           |     |                                                                                                                                                                                                                                                                                                                                                                                |                |
| 42 | Participant timeline                                      | 13  | Time schedule of enrolment, interventions (including any run-ins and washouts), assessments, and visits for participants. A schematic diagram is highly recommended (see Figure)                                                                                                                                                                                               | 9+appendix III |
| 43 |                                                           |     |                                                                                                                                                                                                                                                                                                                                                                                |                |
| 44 |                                                           |     |                                                                                                                                                                                                                                                                                                                                                                                |                |
| 45 |                                                           |     |                                                                                                                                                                                                                                                                                                                                                                                |                |
| 46 |                                                           |     |                                                                                                                                                                                                                                                                                                                                                                                |                |
| 47 | Sample size                                               | 14  | Estimated number of participants needed to achieve study objectives and how it was determined, including clinical and statistical assumptions supporting any sample size calculations                                                                                                                                                                                          | 12-15          |
| 48 |                                                           |     |                                                                                                                                                                                                                                                                                                                                                                                |                |
| 49 |                                                           |     |                                                                                                                                                                                                                                                                                                                                                                                |                |
| 50 |                                                           |     |                                                                                                                                                                                                                                                                                                                                                                                |                |
| 51 | Recruitment                                               | 15  | Strategies for achieving adequate participant enrolment to reach target sample size                                                                                                                                                                                                                                                                                            | 12             |
| 52 |                                                           |     |                                                                                                                                                                                                                                                                                                                                                                                |                |
| 53 |                                                           |     |                                                                                                                                                                                                                                                                                                                                                                                |                |

#### Methods: Assignment of interventions (for controlled trials)

Allocation:

|    |                                                           |     |                                                                          |       |
|----|-----------------------------------------------------------|-----|--------------------------------------------------------------------------|-------|
| 1  |                                                           |     |                                                                          |       |
| 2  | Sequence                                                  | 16a | Method of generating the allocation sequence (eg, computer-              |       |
| 3  | generation                                                |     | generated random numbers), and list of any factors for stratification.   |       |
| 4  |                                                           |     | To reduce predictability of a random sequence, details of any planned    | 10    |
| 5  |                                                           |     | restriction (eg, blocking) should be provided in a separate document     |       |
| 6  |                                                           |     | that is unavailable to those who enrol participants or assign            |       |
| 7  |                                                           |     | interventions                                                            |       |
| 8  |                                                           |     |                                                                          |       |
| 9  |                                                           |     |                                                                          |       |
| 10 | Allocation                                                | 16b | Mechanism of implementing the allocation sequence (eg, central           |       |
| 11 | concealme                                                 |     | telephone; sequentially numbered, opaque, sealed envelopes),             | 10    |
| 12 | nt                                                        |     | describing any steps to conceal the sequence until interventions are     |       |
| 13 | mechanism                                                 |     | assigned                                                                 |       |
| 14 |                                                           |     |                                                                          |       |
| 15 | Implementa                                                | 16c | Who will generate the allocation sequence, who will enrol participants,  | 10    |
| 16 | tion                                                      |     | and who will assign participants to interventions                        |       |
| 17 |                                                           |     |                                                                          |       |
| 18 |                                                           |     |                                                                          |       |
| 19 | Blinding                                                  | 17a | Who will be blinded after assignment to interventions (eg, trial         | 10    |
| 20 | (masking)                                                 |     | participants, care providers, outcome assessors, data analysts), and     |       |
| 21 |                                                           |     | how                                                                      |       |
| 22 |                                                           |     |                                                                          |       |
| 23 |                                                           | 17b | If blinded, circumstances under which unblinding is permissible, and     | -     |
| 24 |                                                           |     | procedure for revealing a participant's allocated intervention during    |       |
| 25 |                                                           |     | the trial                                                                |       |
| 26 |                                                           |     |                                                                          |       |
| 27 |                                                           |     |                                                                          |       |
| 28 | <b>Methods: Data collection, management, and analysis</b> |     |                                                                          |       |
| 29 |                                                           |     |                                                                          |       |
| 30 | Data collection                                           | 18a | Plans for assessment and collection of outcome, baseline, and other      |       |
| 31 | methods                                                   |     | trial data, including any related processes to promote data quality (eg, | 12-15 |
| 32 |                                                           |     | duplicate measurements, training of assessors) and a description of      |       |
| 33 |                                                           |     | study instruments (eg, questionnaires, laboratory tests) along with      |       |
| 34 |                                                           |     | their reliability and validity, if known. Reference to where data        |       |
| 35 |                                                           |     | collection forms can be found, if not in the protocol                    |       |
| 36 |                                                           |     |                                                                          |       |
| 37 |                                                           |     |                                                                          |       |
| 38 |                                                           | 18b | Plans to promote participant retention and complete follow-up,           | -     |
| 39 |                                                           |     | including list of any outcome data to be collected for participants who  |       |
| 40 |                                                           |     | discontinue or deviate from intervention protocols                       |       |
| 41 |                                                           |     |                                                                          |       |
| 42 | Data                                                      | 19  | Plans for data entry, coding, security, and storage, including any       |       |
| 43 | management                                                |     | related processes to promote data quality (eg, double data entry;        | 12-15 |
| 44 |                                                           |     | range checks for data values). Reference to where details of data        |       |
| 45 |                                                           |     | management procedures can be found, if not in the protocol               |       |
| 46 |                                                           |     |                                                                          |       |
| 47 |                                                           |     |                                                                          |       |
| 48 | Statistical                                               | 20a | Statistical methods for analysing primary and secondary outcomes.        | 12-15 |
| 49 | methods                                                   |     | Reference to where other details of the statistical analysis plan can be |       |
| 50 |                                                           |     | found, if not in the protocol                                            |       |
| 51 |                                                           |     |                                                                          |       |
| 52 |                                                           | 20b | Methods for any additional analyses (eg, subgroup and adjusted           | 12-15 |
| 53 |                                                           |     | analyses)                                                                |       |
| 54 |                                                           |     |                                                                          |       |
| 55 |                                                           | 20c | Definition of analysis population relating to protocol non-adherence     |       |
| 56 |                                                           |     | (eg, as randomised analysis), and any statistical methods to handle      | 12-15 |
| 57 |                                                           |     | missing data (eg, multiple imputation)                                   |       |
| 58 |                                                           |     |                                                                          |       |
| 59 |                                                           |     |                                                                          |       |
| 60 |                                                           |     |                                                                          |       |

## Methods: Monitoring

|                                 |     |                                                                                                                                                                                                                                                                                                                                       |       |
|---------------------------------|-----|---------------------------------------------------------------------------------------------------------------------------------------------------------------------------------------------------------------------------------------------------------------------------------------------------------------------------------------|-------|
| Data monitoring                 | 21a | Composition of data monitoring committee (DMC); summary of its role and reporting structure; statement of whether it is independent from the sponsor and competing interests; and reference to where further details about its charter can be found, if not in the protocol. Alternatively, an explanation of why a DMC is not needed | 11-12 |
|                                 | 21b | Description of any interim analyses and stopping guidelines, including who will have access to these interim results and make the final decision to terminate the trial                                                                                                                                                               | 15    |
| Harms                           | 22  | Plans for collecting, assessing, reporting, and managing solicited and spontaneously reported adverse events and other unintended effects of trial interventions or trial conduct                                                                                                                                                     | 12    |
| Auditing                        | 23  | Frequency and procedures for auditing trial conduct, if any, and whether the process will be independent from investigators and the sponsor                                                                                                                                                                                           | 12    |
| <b>Ethics and dissemination</b> |     |                                                                                                                                                                                                                                                                                                                                       |       |
| Research ethics approval        | 24  | Plans for seeking research ethics committee/institutional review board (REC/IRB) approval                                                                                                                                                                                                                                             | 15-16 |
| Protocol amendments             | 25  | Plans for communicating important protocol modifications (eg, changes to eligibility criteria, outcomes, analyses) to relevant parties (eg, investigators, REC/IRBs, trial participants, trial registries, journals, regulators)                                                                                                      | 16    |
| Consent or assent               | 26a | Who will obtain informed consent or assent from potential trial participants or authorised surrogates, and how (see Item 32)                                                                                                                                                                                                          | 9     |
|                                 | 26b | Additional consent provisions for collection and use of participant data and biological specimens in ancillary studies, if applicable                                                                                                                                                                                                 | -     |
| Confidentiality                 | 27  | How personal information about potential and enrolled participants will be collected, shared, and maintained in order to protect confidentiality before, during, and after the trial                                                                                                                                                  | 15-16 |
| Declaration of interests        | 28  | Financial and other competing interests for principal investigators for the overall trial and each study site                                                                                                                                                                                                                         | 17    |
| Access to data                  | 29  | Statement of who will have access to the final trial dataset, and disclosure of contractual agreements that limit such access for investigators                                                                                                                                                                                       | 16    |
| Ancillary and post-trial care   | 30  | Provisions, if any, for ancillary and post-trial care, and for compensation to those who suffer harm from trial participation                                                                                                                                                                                                         | -     |

|    |                   |     |                                                                              |        |
|----|-------------------|-----|------------------------------------------------------------------------------|--------|
| 1  |                   |     |                                                                              |        |
| 2  | Dissemination     | 31a | Plans for investigators and sponsor to communicate trial results to          |        |
| 3  | policy            |     | participants, healthcare professionals, the public, and other relevant       | 16     |
| 4  |                   |     | groups (eg, via publication, reporting in results databases, or other        |        |
| 5  |                   |     | data sharing arrangements), including any publication restrictions           |        |
| 6  |                   |     |                                                                              |        |
| 7  |                   | 31b | Authorship eligibility guidelines and any intended use of professional       | 16     |
| 8  |                   |     | writers                                                                      |        |
| 9  |                   |     |                                                                              |        |
| 10 |                   | 31c | Plans, if any, for granting public access to the full protocol, participant- | 16     |
| 11 |                   |     | level dataset, and statistical code                                          |        |
| 12 |                   |     |                                                                              |        |
| 13 |                   |     |                                                                              |        |
| 14 | <b>Appendices</b> |     |                                                                              |        |
| 15 |                   |     |                                                                              |        |
| 16 | Informed          | 32  | Model consent form and other related documentation given to                  | Appen  |
| 17 | consent           |     | participants and authorised surrogates                                       | dix I  |
| 18 | materials         |     |                                                                              |        |
| 19 |                   |     |                                                                              |        |
| 20 | Biological        | 33  | Plans for collection, laboratory evaluation, and storage of biological       | Appen  |
| 21 | specimens         |     | specimens for genetic or molecular analysis in the current trial and for     | dix II |
| 22 |                   |     | future use in ancillary studies, if applicable                               |        |
| 23 |                   |     |                                                                              |        |
| 24 |                   |     |                                                                              |        |
| 25 |                   |     |                                                                              |        |
| 26 |                   |     |                                                                              |        |
| 27 |                   |     |                                                                              |        |
| 28 |                   |     |                                                                              |        |
| 29 |                   |     |                                                                              |        |
| 30 |                   |     |                                                                              |        |
| 31 |                   |     |                                                                              |        |
| 32 |                   |     |                                                                              |        |
| 33 |                   |     |                                                                              |        |
| 34 |                   |     |                                                                              |        |
| 35 |                   |     |                                                                              |        |
| 36 |                   |     |                                                                              |        |
| 37 |                   |     |                                                                              |        |
| 38 |                   |     |                                                                              |        |
| 39 |                   |     |                                                                              |        |
| 40 |                   |     |                                                                              |        |
| 41 |                   |     |                                                                              |        |
| 42 |                   |     |                                                                              |        |
| 43 |                   |     |                                                                              |        |
| 44 |                   |     |                                                                              |        |
| 45 |                   |     |                                                                              |        |
| 46 |                   |     |                                                                              |        |
| 47 |                   |     |                                                                              |        |
| 48 |                   |     |                                                                              |        |
| 49 |                   |     |                                                                              |        |
| 50 |                   |     |                                                                              |        |
| 51 |                   |     |                                                                              |        |
| 52 |                   |     |                                                                              |        |
| 53 |                   |     |                                                                              |        |
| 54 |                   |     |                                                                              |        |
| 55 |                   |     |                                                                              |        |
| 56 |                   |     |                                                                              |        |
| 57 |                   |     |                                                                              |        |
| 58 |                   |     |                                                                              |        |
| 59 |                   |     |                                                                              |        |
| 60 |                   |     |                                                                              |        |

# BMJ Open

## Improved diagnostics of infectious diseases in Emergency Departments – a protocol of a multifaceted multicenter diagnostic study

|                               |                                                                                                                                                                                                                                                                                                                                                                                                                                                                                                                                                                                                                                                                                                                                                                                                                                                                                                                                                                                                                                                                                                                                                                                                                                                                                                                                                                                                                                                                                                                                                                                                                                                                                                                                                                                                                                                                                                                                                                                                                                                                                                                                                                                                                                                                                                                  |
|-------------------------------|------------------------------------------------------------------------------------------------------------------------------------------------------------------------------------------------------------------------------------------------------------------------------------------------------------------------------------------------------------------------------------------------------------------------------------------------------------------------------------------------------------------------------------------------------------------------------------------------------------------------------------------------------------------------------------------------------------------------------------------------------------------------------------------------------------------------------------------------------------------------------------------------------------------------------------------------------------------------------------------------------------------------------------------------------------------------------------------------------------------------------------------------------------------------------------------------------------------------------------------------------------------------------------------------------------------------------------------------------------------------------------------------------------------------------------------------------------------------------------------------------------------------------------------------------------------------------------------------------------------------------------------------------------------------------------------------------------------------------------------------------------------------------------------------------------------------------------------------------------------------------------------------------------------------------------------------------------------------------------------------------------------------------------------------------------------------------------------------------------------------------------------------------------------------------------------------------------------------------------------------------------------------------------------------------------------|
| Journal:                      | <i>BMJ Open</i>                                                                                                                                                                                                                                                                                                                                                                                                                                                                                                                                                                                                                                                                                                                                                                                                                                                                                                                                                                                                                                                                                                                                                                                                                                                                                                                                                                                                                                                                                                                                                                                                                                                                                                                                                                                                                                                                                                                                                                                                                                                                                                                                                                                                                                                                                                  |
| Manuscript ID                 | bmjopen-2021-049606.R2                                                                                                                                                                                                                                                                                                                                                                                                                                                                                                                                                                                                                                                                                                                                                                                                                                                                                                                                                                                                                                                                                                                                                                                                                                                                                                                                                                                                                                                                                                                                                                                                                                                                                                                                                                                                                                                                                                                                                                                                                                                                                                                                                                                                                                                                                           |
| Article Type:                 | Protocol                                                                                                                                                                                                                                                                                                                                                                                                                                                                                                                                                                                                                                                                                                                                                                                                                                                                                                                                                                                                                                                                                                                                                                                                                                                                                                                                                                                                                                                                                                                                                                                                                                                                                                                                                                                                                                                                                                                                                                                                                                                                                                                                                                                                                                                                                                         |
| Date Submitted by the Author: | 10-Sep-2021                                                                                                                                                                                                                                                                                                                                                                                                                                                                                                                                                                                                                                                                                                                                                                                                                                                                                                                                                                                                                                                                                                                                                                                                                                                                                                                                                                                                                                                                                                                                                                                                                                                                                                                                                                                                                                                                                                                                                                                                                                                                                                                                                                                                                                                                                                      |
| Complete List of Authors:     | <p>Skjøt-Arkil, Helene; University Hospital of Southern Denmark, The Emergency Department; University of Southern Denmark Faculty of Health Sciences, Department of Regional Health Research<br/> Heltborg, Anne; University Hospital of Southern Denmark, The Emergency Department; University of Southern Denmark Faculty of Health Sciences, Department of Regional Health Research<br/> Lorentzen, Morten; University Hospital of Southern Denmark, The Emergency Department; University of Southern Denmark Faculty of Health Sciences, Department of Regional Health Research<br/> Cartuliales, Mariana; University Hospital of Southern Denmark, The Emergency Department; University of Southern Denmark Faculty of Health Sciences, Department of Regional Health Research<br/> Hertz, Mathias Amdi; Odense University Hospital, Department of Infectious Diseases; University of Southern Denmark Faculty of Health Sciences, Department of Clinical Research<br/> Graumann, Ole; Odense University Hospital, Department of Radiology; University of Southern Denmark Faculty of Health Sciences, Institute for Clinical Research<br/> Rosenvinge, Flemming; Odense University Hospital, Department of Clinical Microbiology<br/> Petersen, Eva; University Hospital of Southern Denmark, Blood samples, Biochemistry and Immunology<br/> Østergaard, Claus; University Hospital of Southern Denmark, Department of Clinical Microbiology<br/> Laursen, Christian; Odense University Hospital, Department of Respiratory Medicine; University of Southern Denmark Faculty of Health Sciences, Department of Clinical Research<br/> Skovsted, Thor; University Hospital of Southern Denmark, Blood sample, Biochemistry and Immunology<br/> Posth, Stefan; University of Southern Denmark Faculty of Health Sciences, Department of Clinical Research; Odense University Hospital, Emergency Department<br/> Chen, Ming; University Hospital of Southern Denmark, Department of Clinical Microbiology; University of Southern Denmark Faculty of Health Sciences, Department of Regional Health Research<br/> Mogensen, Christian; University Hospital of Southern Denmark, Emergency Department; University of Southern Denmark Faculty of Health Sciences, Department of Regional Health Research</p> |



1  
2  
3  
4  
5  
6  
7  
8  
9  
10  
11  
12  
13  
14  
15  
16  
17  
18  
19  
20  
21  
22  
23  
24  
25  
26  
27  
28  
29  
30  
31  
32  
33  
34  
35  
36  
37  
38  
39  
40  
41  
42  
43  
44  
45  
46  
47  
48  
49  
50  
51  
52  
53  
54  
55  
56  
57  
58  
59  
60

|                                   |                                                                                                                                                                                                                     |
|-----------------------------------|---------------------------------------------------------------------------------------------------------------------------------------------------------------------------------------------------------------------|
| <b>Primary Subject Heading:</b>   | Infectious diseases                                                                                                                                                                                                 |
| <b>Secondary Subject Heading:</b> | Diagnostics, Emergency medicine, Epidemiology, Infectious diseases, Radiology and imaging                                                                                                                           |
| <b>Keywords:</b>                  | Diagnostic microbiology < INFECTIOUS DISEASES, MICROBIOLOGY, Computed tomography < RADIOLOGY & IMAGING, Diagnostic radiology < RADIOLOGY & IMAGING, Ultrasound < RADIOLOGY & IMAGING, ACCIDENT & EMERGENCY MEDICINE |
|                                   |                                                                                                                                                                                                                     |





I, the Submitting Author has the right to grant and does grant on behalf of all authors of the Work (as defined in the below author licence), an exclusive licence and/or a non-exclusive licence for contributions from authors who are: i) UK Crown employees; ii) where BMJ has agreed a CC-BY licence shall apply, and/or iii) in accordance with the terms applicable for US Federal Government officers or employees acting as part of their official duties; on a worldwide, perpetual, irrevocable, royalty-free basis to BMJ Publishing Group Ltd ("BMJ") its licensees and where the relevant Journal is co-owned by BMJ to the co-owners of the Journal, to publish the Work in this journal and any other BMJ products and to exploit all rights, as set out in our [licence](#).

The Submitting Author accepts and understands that any supply made under these terms is made by BMJ to the Submitting Author unless you are acting as an employee on behalf of your employer or a postgraduate student of an affiliated institution which is paying any applicable article publishing charge ("APC") for Open Access articles. Where the Submitting Author wishes to make the Work available on an Open Access basis (and intends to pay the relevant APC), the terms of reuse of such Open Access shall be governed by a Creative Commons licence – details of these licences and which [Creative Commons](#) licence will apply to this Work are set out in our licence referred to above.

Other than as permitted in any relevant BMJ Author's Self Archiving Policies, I confirm this Work has not been accepted for publication elsewhere, is not being considered for publication elsewhere and does not duplicate material already published. I confirm all authors consent to publication of this Work and authorise the granting of this licence.

1

2  
3  
4  
5  
6  
7  
8  
9  
10  
11  
12  
13  
14  
15  
16  
17  
18  
19  
20  
21  
22  
23  
24  
25  
26  
27  
28  
29  
30  
31  
32  
33  
34  
35  
36  
37  
38  
39  
40  
41  
42  
43  
44  
45  
46  
47  
48  
49  
50  
51  
52  
53  
54  
55  
56  
57  
58  
59  
60

# Improved diagnostics of infectious diseases in Emergency Departments

## – a protocol of a multifaceted multicenter diagnostic study

Short title: Improved diagnostics of infectious diseases

Helene Skjøt-Arkil<sup>1,2\*</sup>, Anne Heltborg<sup>3</sup>, Morten Hjarnø Lorentzen<sup>1,2</sup>, Mariana Bichuette Cartuliales<sup>1,2</sup>, Mathias Amdi Hertz<sup>4</sup>, Ole Graumann<sup>5,6</sup>, Flemming Schønning Rosenvinge<sup>7</sup>, Eva Rabing Brix Petersen<sup>8</sup>, Claus Østergaard<sup>9</sup>, Christian B. Laursen<sup>6,10</sup>, Thor Aage Skovsted<sup>8</sup>, Stefan Posth<sup>6,11</sup>, Ming Chen<sup>12</sup>, Christian Backer Mogensen<sup>1,2</sup>

### Affiliations

1: Emergency Department, University Hospital of Southern Denmark, Aabenraa, Denmark

2: Department of Regional Health Research, University of Southern Denmark, Aabenraa, Denmark

3: Medical Department, University Hospital of Southern Denmark, Sønderborg, Denmark

4: Department of Infectious Diseases, Odense University Hospital, Odense, Denmark

5: Radiology Department, Odense University Hospital, Odense, Denmark

6: Department of Clinical Research, University of Southern Denmark, Odense, Denmark

7: Department of Clinical Microbiology, Odense University Hospital, Odense, Denmark

8: Bloodsamples, Biochemistry and Immunology, University Hospital of Southern Denmark, Aabenraa, Denmark

9: Department of Clinical Microbiology, Lillebælt Hospital, Vejle, Denmark

10: Department of Respiratory Medicine, Odense University Hospital, Odense, Denmark

11: Emergency Department, Odense University Hospital, Odense, Denmark

12: Department of Microbiology, University Hospital of Southern Denmark, Aabenraa, Denmark

\*Corresponding author: Emergency Department, University Hospital of Southern Denmark, Kresten Philipsensvej 15, 6200 Aabenraa, Denmark; Email: Helene.skjoet-arkil@rsyd.dk

Word count: 4.446

2

## Abstract

**Background:** The major obstacle in prescribing an appropriate and targeted antibiotic treatment is insufficient knowledge concerning *whether* the patient has a bacterial infection, *where* the focus of infection is and *which* bacteria are the agents of the infection. A prerequisite for the appropriate use of antibiotics is timely access to accurate diagnostics such as point-of-care (POC) testing.

The study aims to evaluate diagnostic tools and working methods that support a prompt and accurate diagnosis of hospitalized patients suspected of an acute infection. We will focus on the most common acute infections; community-acquired pneumonia (CAP) and acute pyelonephritis (APN). The objectives are to investigate 1) patient characteristics and treatment trajectory of the different acute infections, 2) diagnostic and prognostic accuracy of infection markers, 3) diagnostic accuracy of POC urine flow cytometry on diagnosing and excluding bacteriuria, 4) how effective the addition of POC analysis of sputum to the diagnostic set-up for CAP is on antibiotic prescriptions, 5) diagnostic accuracy of POC ultrasound and ultralow dose (ULD) Computed Tomography (CT) on diagnosing CAP, 6) diagnostic accuracy of specialist ultrasound on diagnosing APN, 7) diagnostic accuracy of POC ultrasound in diagnosing hydronephrosis in patients suspected of APN.

**Methods and analysis:** It is a multifaceted multicenter diagnostic study, including 1000 adults admitted with suspicion of an acute infection. Participants will within the first 24 hours of admission undergo additional diagnostic tests including infection markers, POC urine flow cytometry, POC analysis of sputum, POC and specialist ultrasound, and ultralow dose CT. The primary reference standard is an assigned diagnosis determined by a panel of experts.

**Ethics, dissemination and registration:** Approved by Regional Committees on Health Research Ethics for Southern Denmark, Danish Data Protection Agency, and clinicaltrials.gov. Results will be presented in peer-reviewed journals, and positive, negative and inconclusive results will be published.

**Key words:** Acute Infection, antibiotics, diagnostic, pneumonia, pyelonephritis, sputum, point-of-care-test, ultrasound, infection marker, Ultralow dose Computed Tomography

### Strengths and limitations of the study:

- It is a pragmatic study that reflects reality and has potential for substantial clinical significance
- The study combines diagnostics and knowledge from five different medical specialties
- The study is complex and contains a number of sub-studies which share the same population
- The study is only generalizable to settings with a similar technological context and trained staff
- COVID-19 and the consequent societal lockdown might affect patient distribution

3

## World Health Organization Trial Registration Data Set

**Primary Registry and Trial Identifying Number:** ClinicalTrials.gov: NCT: 04661085, 04681963, 04667195, 04652167, 04686318, 04686292, 04651712, 04645030, and 04651244.

**Date of Registration in Primary Registry:** December 2020

**Secondary Identifying Numbers:** Regional Committees on Health Research Ethics for Southern Denmark (S-20200188), and Danish Data Protection Agency (20/60508)

**Source(s) of Monetary or Material Support:** University Hospital of Southern Denmark and University of Southern Denmark, Aabenraa, Denmark

**Primary Sponsor:** Professor Christian Backer Mogensen, University Hospital of Southern Denmark and University of Southern Denmark, Aabenraa, Denmark

**Secondary Sponsor(s):** Associate professor Helene Skjøt-Arkil, University Hospital of Southern Denmark and University of Southern Denmark, Aabenraa, Denmark

**Contact for Public Queries:** University Hospital of Southern Denmark, Kresten Philipsens vej 15, 6200 Aabenraa, Denmark, tlf: +45 79970000, e-mail: Akutforskning.SHS@rsyd.dk

**Contact for Scientific Queries:** Professor Christian Backer Mogensen, Emergency Department, Hospital Sønderjylland, Kresten Philipsensvej 15, 6200 Aabenraa, Denmark. Email: Christian.Backer.Mogensen@rsyd.dk. Phone: 0045 7997000

**Public Title:** Improved diagnostics of acute infectious diseases

**Scientific Title:** Improved diagnostics of infectious diseases in Emergency Departments

**Countries of Recruitment:** Denmark

**Health Condition(s) or Problem(s) Studied:** Infectious diseases including community-acquired pneumonia and acute pyelonephritis

### Intervention(s):

Sub-study 2: Index test: infection markers (serum procalcitonin, and soluble urokinase plasminogen activator receptor

Sub-study 3: Index test: point-of-care urinary flow cytometry

Sub-study 4: Intervention: Point-of-care tool providing rapid microbiological results on sputum samples based on polymerase chain reaction. Control: routine microbiology analysis

Sub-study 5: Index test: Ultralow dose computed tomography scans / ultrasound scanning

Sub-study 6: Index test: Contrast enhanced ultrasound

Sub-study 7: Index test: Ultrasound scanning

**Key Inclusion and Exclusion Criteria:** Adults admitted to the Emergency Department are invited if receiving physician suspects the patient has an infection. Patients are excluded if participating will delay a life-saving treatment, if they have been admitted within 14 days, if pregnant, or if having severe immunodeficiency.

4

**Study Type:** It is a multifaceted multicenter study, primarily diagnostic accuracy set of studies but a randomised controlled trial of sputum diagnostics embedded within it. It has been divided into seven-substudies.

Sub-study 1: Observational, descriptive study

Sub-study 2, 3, 5, 6, 7: Observational, diagnostic accuracy studies

Sub-study 4: Eksperimental, randomized controlled trial - parallel assigned, allocated 1:1 according to a computer-generated randomization schedule.

**Date of First Enrollment:** February 1<sup>st</sup> 2021

#### **Sample Size**

Sample Size consists of: 200 patients diagnosed with CAP and 150 patients with APN

Number of participants that the trial plans to enrol in total: 1000

Number of participants that the trial has enrolled: 460

**Recruitment Status:** Recruiting: participants are currently being recruited and enrolled

#### **Primary Outcome(s):**

Outcome sub-study 1: Diagnosis of community acquired pneumonia and acute pyelonephritis

Method of measurement: Expert panel consisting of emergency and infectious disease specialists (reference standard)

Timepoint: within seven days after admission

Outcome sub-study 2: Diagnosis of community acquired pneumonia and acute pyelonephritis

Method of measurement: Expert panel consisting of emergency and infectious disease specialists (reference standard)

Timepoint: within seven days after admission

Outcome sub-study 3: bacteriuria

Method of measurement: urine culturing specialists (reference standard)

Timepoint: Time of admission

Outcome sub-study: Type of prescribed antibiotic

Method of measurement: Medical record audit

Timepoint: 4 hours

Outcome sub-study 5: Diagnosis of community acquired pneumonia

Method of measurement: high-resolution computed tomography specialists (reference standard)

Timepoint: within 24 hours of admission

Outcome sub-study 6: Diagnosis of acute pyelonephritis

Method of measurement: magnetic resonance imaging specialists (reference standard)

Timepoint: within 24 hours of admission

Outcome sub-study 7: Diagnosis of acute pyelonephritis

Method of measurement: magnetic resonance imaging specialists (reference standard)

Timepoint: within 24 hours of admission

5

**Key Secondary Outcomes:** Length of stay (medical record audit), Mortality (medical record audit and Danish National Patient Register, 30 days, 90 days, and inhospital mortality), Readmission to hospital within 30 days from day of discharge (medical record audit), Admission to intensive care (medical record audit), Antibiotic treatment at 48 hours of admission (medical record audit).

**Ethics Review:** The study was approved by the Regional Committees on Health Research Ethics for Southern Denmark (S-20200188) on January 7<sup>th</sup> 2021. Contact: Komite@rsyd.dk

**Completion date:** The last patient is expected to be included in February 2022. The final data is expected to be collected in June 2022.

**IPD sharing statement:** The datasets used and/or analysed during the current study are available from the corresponding author on reasonable request



6

## Introduction

### *Antibiotic resistance*

Multi-resistant bacteria is one of the major threats to the public health(1). The incidence of multi-resistant bacteria is increasing in Denmark(2) and every 20th patient admitted to a Danish Emergency Department (ED) is colonized with multi-resistant bacteria(3). Denmark has focused on this challenge(4) by screening special patient groups for multi-resistant bacteria(5, 6), and by initiating campaigns to reduce antibiotic consumption - mainly the use of broad-spectrum antibiotics in hospitals(4, 7).

The Danish Ministry of Health has made extensive efforts targeting the use of antibiotics in hospitals. However, the major obstacle in reducing the prescription of broad-spectrum antibiotics is insufficient knowledge concerning *whether* the patient has a bacterial infection, *where* the focus of infection is and *which* bacteria are the agents of the infection(8). Uncertainty in the answers to these three questions often leads a clinician to choose a broad-spectrum antibiotic at the onset of treatment. Unfortunately, the prescription of a broad-spectrum antibiotic is rarely revised when laboratory results are available, often because the patient already has been discharged(9).

### *Acute infections and diagnostic tools*

A prerequisite for appropriate use of antibiotics is timely access to accurate diagnostic tests, since treatment of acute infections should be initiated within a few hours to avoid serious complications such as bacteremia, sepsis, organ failure, septic shock and death(10). The most common conditions among ED patients with suspected infections are community acquired pneumonia (CAP) and acute pyelonephritis (APN)(11, 12). Diagnosing CAP and APN can be challenging as symptoms are often weak and nonspecific and the current methods for focal and etiological diagnosis have low sensitivity and specificity and often deliver results after the decision regarding antibiotic treatment has been made(9, 13, 14).

The Coronavirus Disease 2019 (COVID-19) pandemic has highlighted the need of accurate diagnostic tests. Quick and correct classification of pneumonia as COVID-19, another viral or bacterial pneumonia, or even COVID-19 complicated with bacterial pneumonia, is of vital importance to select the correct treatment (including antibiotics), and the correct infection control measures, including isolation.

In order to make the correct diagnosis and prescribe an appropriate and targeted treatment within a few hours of admission, it is important to the physician to be able to answer the following three questions: a) Is it an infection that requires antibiotic treatment (*infection marker*)? b) Where is the focus of infection (imaging *diagnosis*)? c) Which bacteria should the prescribed antibiotic target (*etiologic diagnosis*)?

### **Bacterial infection markers**

To support the diagnosis of an infection and assess its severity, a measure of the systemic inflammatory response is useful e.g. abnormal temperature, elevated leucocyte count with neutrocytosis, or elevated C-reactive protein (CRP). Some uncertainty is associated with CRP because it has a delayed response to bacterial infection and often is elevated in non-infectious inflammatory conditions(15). A more sensitive and specific marker that can differentiate between bacterial and viral infection and reflect the severity of the infection is desired(16). Serum procalcitonin (PCT) has potential as a diagnostic tool in suspected bacterial infections(17) and can distinguish between viral and bacterial pneumonias(18). Soluble urokinase plasminogen activator receptor (suPAR) might have a potential as a marker for acute bacterial infections requiring antibiotic treatment(19). However, there are no well-conducted studies which compare simultaneously all three biomarkers diagnostic abilities for bacterial infections in general or in relation to CAP or APN (16, 20).

### **Imaging diagnostics**

7

1  
2  
3 The CAP diagnosis is primarily based on clinical symptoms and findings, supplemented with chest X-ray, which has a  
4 low sensitivity and specificity (21). Identifying an improved imaging alternative with high diagnostic sensitivity and  
5 specificity and minimal risk to the patient is imperative. Computed Tomography scans (CT), e.g. high-resolution CT  
6 (HRCT) provides a detailed diagnosis of thoracic diseases, but the radiation dose is high and potentially harmful. Low-  
7 dose CT has shown promising diagnostic results, but the radiation dose is still potentially harmful (22). Ultralow dose  
8 CT (ULDCT) of the thorax could be an alternative, but has yet to be studied within an ED context. Another relevant  
9 imaging modality is ultrasound scanning (US). US of the lungs is useful to diagnose pulmonary edema and pleural  
10 effusion, but the value of US performed by a novice operator when diagnosing CAP in an ED setting needs further  
11 investigation(23).

12  
13  
14  
15 Currently, no imaging methods are used to verify the diagnosis of APN. The diagnosis is primarily based on unspecific  
16 clinical findings (24), and is often not confirmed microbiologically (25). Complicating factors such as hydronephrosis  
17 and renal abscess can be visualized with conventional US (26). Contrast enhanced US (CEUS) seems to be a promising  
18 diagnostic imaging modality of acute renal inflammation (27, 28). The value and suitability in a clinical setting of this  
19 more advanced US investigation is unknown.

### 20 21 22 **Etiological diagnostics**

23 Sputum can be cultivated to determine the agent of CAP. However, results are often unspecific and not available  
24 until after discharge of the patient or completion of treatment(9). A point-of-care (POC) tool providing rapid  
25 microbiological results on e.g. sputum samples would therefore be useful. Systems are available today based on  
26 polymerase chain reaction (PCR) methods with results available within one hour for a variety of viral and bacterial  
27 pathogens (29). The impact of such fast diagnostic systems on antibiotic prescriptions has not been investigated in  
28 an ED context.

29  
30  
31  
32 The diagnosis of APN is verified by significant bacteriuria in urine culture (25), but as many as half of the patients  
33 with clinical APN fails to meet this diagnostic criterion. Unfortunately, the time from sample to result for urine  
34 cultures is more than 24 hours (24, 25, 30, 31). Urine test strips are unreliable with low specificity and low predictive  
35 values(32). Therefore, a POC test is desired, which can provide rapid results and quickly identify a bacteriuria. One  
36 such tool may be urine flow cytometry (UFC), which has shown promising diagnostic value for the exclusion of  
37 bacteriuria with a high negative predictive value (33). However, better documentation for its use as an ED diagnostic  
38 screening method is needed.

### 39 40 41 ***Aim and objectives***

42 Our broad hypothesis is that improved diagnostic strategies for patients in ED with suspicion of systemic infection  
43 can contribute to more rapid and accurate diagnosis. Thereby, we assume that a more appropriate antibiotic  
44 treatment can be administered to these patients.

45  
46  
47  
48 The project aims to evaluate alternative diagnostic tools and working methods that support a prompt and accurate  
49 diagnosis of hospitalized patients suspected of an acute infection. We will focus on the most common ED infections;  
50 CAP and APN. The research objectives are to answer the following questions:

- 51  
52 1) What are the patient characteristics and treatment trajectory of the different ED infections?
- 53 2) What is the diagnostic and prognostic accuracy of the infection markers suPAR, and CRP in patients with  
54 suspected CAP and APN?
- 55 3) What is the diagnostic accuracy of POC-UFC on diagnosing and excluding bacteriuria?
- 56 4) How effective is the addition of POC-PCR analysis of sputum to the diagnostic set-up for CAP on antibiotic  
57 prescribing?
- 58 5) What is the diagnostic accuracy of POC-US and ULDCT on diagnosing CAP?
- 59 6) What is the diagnostic accuracy of CEUS on diagnosing APN?
- 60

8

7) What is the diagnostic accuracy of POC-US in diagnosing hydronephrosis in patients suspected of APN?

The ultimate goal is to combine the results of all these seven objectives into a novel diagnostic model which the ED physician can apply when receiving a patient with suspicion of infection.

## Methods

### Study design

The study is designed as a multifaceted multicenter diagnostic study. Participants will undergo additional diagnostic tests depending on the primary suspected focus of infection.

The study protocol is reported in accordance with the SPIRIT (Standard protocol items: Recommendations for interventional trials) statement(34). Informed consent materials can be found in appendix I, Biological specimens in appendix II, and Schedule of enrollment, interventions, and assessments in appendix III.

### Setting

The study will recruit participants from three Danish EDs: the regional Hospital, Lillebælt Hospital in Kolding, the regional Hospital, Hospital Sønderjylland in Aabenraa, and the University Hospital, Odense University Hospital in Odense. Enrolment commences from February 8<sup>th</sup> 2021 and continues until the predefined sample size has been reached.

Project assistants will recruit the participants and collect data. The project assistants will have a healthcare education (physicians, physiotherapists and medical students). They are certificated in focused US of kidney and lung (one-day POC-US course, 25 supervised scans, and Objective Structured Assessment of US Skills (OASUS) test) within one month from enrollment.

The study originates from the Emergency Research Unit affiliated at University Hospital of Southern Denmark and Department of Regional Health Research at University of Southern Denmark.

### Population and eligibility criteria

Inclusion of patients is based on the receiving ED physician's initial clinical assessment of the patient. Adults aged 18 or older admitted to the ED will be invited to participate in the study, if the receiving physician suspects the patient is having an infection. Only patients able to give informed consent will be participating in the study. Depending on primary suspected focus of infection (CAP, APN or other/unknown), the patients will be included into one of three diagnostic tracks (A, B, or C) as shown in Figure 1.

Exclusion criteria that apply to all three tracks at time of recruitment

- If the attending physician considers that participation will delay a life-saving treatment or directly transfer to intensive care unit
- Admission (defined as >24 hours hospital visit) within the last 14 days to avoid hospital acquired infections
- Verified COVID-19 disease within 14 days before admission to avoid a skewed population consisting of COVID-19 patients instead of CAP patients. Patients suspected of COVID-19, at the time of recruitment, will not be excluded – nor if subsequently tested positive.
- Pregnant women, this to uniform all the studies. At the participating EDs the pregnant women represent a very small patient group, as they are admitted directly to the ward.
- Severe immunodeficiencies
  - o Primary immunodeficiencies
  - o Secondary immunodeficiencies

9

- Human immunodeficiency virus (HIV) positive, with a cluster of differentiation 4 (CD4) cell count <200
- Patients receiving immunosuppressive treatment (Anatomical therapeutic chemical (ATC) classification L04A)
- Corticosteroid treatment (>20 mg/day prednisone or equivalent for >14 days within the last 30 days)
- Chemotherapy within 30 days

Exclusion criteria that only apply to patients with suspected CAP (track A):

- Patients <40 years old are excluded from the ULDCT and HRCT due to risk of cancer from radiation
- Patients <65 years who already participated once will be excluded from ULDCT and HRCT due to risk of cancer from radiation

Exclusion criteria that only apply to patients with suspected APN (track B):

- Patients are excluded from magnetic resonance imaging (MRI) according to common MRI exclusion criteria (e.g. contraindicating metal in the body) and claustrophobia
- Patients with known allergy to US contrast

Figure 1 Design of patient flow and diagnostic tracks

## Recruitment

The study assistants will identify potential eligible patients through the local IT logistic system, which lists patients visiting the ED (Cetrea Anywhere®). According to the local guidelines, a medical clinical assessment of the patients is performed within half an hour from arrival at the ED(35). The study assistant will immediately after the assessment consult the receiving physician to ask if a) a systemic infection is suspected, and b) what the most likely focus is: lungs, urinary tract, elsewhere/unknown. If the patient meets the eligibility criteria, the study assistant will present the study both verbally and in writing, and invite the patient to participate in the study.

## Procedure

The study assistant will after obtained written consent order blood samples, urine sample, and the diagnostic tests described in the assigned track. The study assistant will collect data for patient characteristic by looking in the patient record and by patient interview.

## Infection markers

Blood samples will be collected by a medical laboratory technologist and transferred to the local laboratory for analysis of CRP (routine analysis), PCT and suPAR. Laboratory staff will be blinded to participant diagnosis and outcome. PCT results will be available to the treating physician, but the suPAR result will not be available. CRP will be measured using an immunoturbidimetric assay (Tina-quant®, Roche) on Roche/Hitachi Cobas® systems. Plasma PCT will be quantified by an automated sandwich immunoassay "ECLIA" (Elecsys®, BRAHMS PCT-analyses) on Cobas® within two hours from collection according to standard procedure. Plasma suPAR will be quantified by using the commercial available suPARnostic® Tubilatex assay reagents (ViroGates, Denmark) on Cobas® as previously validated (36). Separated plasma is kept refrigerated and analysed for suPAR within 48 hours after collection.

## POC-UFC

A urine sample will be collected according to routine procedure by the study assistant. The sample will be divided into three aliquots; one for routine urine culturing, one for routine dipstick analysis and one half for POC-UFC

10

1  
2 analysis (UF-5000, Sysmex, Kobe, Japan). The POC-UFC analysis will be performed according to manufacturer's  
3 instruction and conducted by study assistants or laboratory staff in a point-of-care laboratory close to the  
4 department to which the transport time is less than 10 minutes. Laboratory staff will be blinded to participant  
5 diagnosis and outcome. The results of the POC-UFC analysis will not be visible to the treating physician.  
6  
7

8 The results of the dipstick analysis and the urine culturing will be available to the treating physician as part of the  
9 usual procedure (within one hour for dipstick and after up to several days for culturing).  
10

### 11 **POC-PCR sputum analysis**

12 A sputum sample will be collected according to standard procedure as soon as possible after recruitment by the  
13 study assistant. This sample will be randomly assigned to one of two groups with 1:1 allocation: 1) POC-PCR analysis  
14 (Biofire® FilmArray® Pneumonia Panel plus, Biomérieux, Marcy l'Etoile, France) in accordance with manufacturer's  
15 instruction(37), and 2) Routine microbiology analysis (culturing and PCR). Expecterated sputum or tracheal  
16 secretions will be used for the PCR analysis. All sputum samples will be cultured. Gram stain and microscopy are not  
17 included in the analysis  
18  
19

20  
21 The randomization will be performed by the study assistants and generated electronically using Research Electronic  
22 Data Capture (RedCap) Randomization Module (38) with permuting blocks and stratified according to sites. Allocation  
23 concealment is ensured, as randomization is performed electronically and the study assistants administering the  
24 randomization will not have access to the randomization code. The allocation is revealed after consent is obtained  
25 and sputum collection successful.  
26  
27

28 The study assistants or laboratory staff will perform the POC-PCR analysis in a point-of-care laboratory at the ED or  
29 close to the department to which the transport time is less than 10 minutes. The used POC-PCR targets 27 of the  
30 most common pathogens involved in lower respiratory tract infections (appendix IV). The result of the POC-PCR will  
31 be presented by the study assistant to the treating physician within four hours upon admission. The treating  
32 physician will along with the result receive a recommended action list (appendix V), developed by microbiologists.  
33  
34

35 The patients will be blinded, and the investigator will be blinded to data management and analysis. Outcome  
36 adjudicators will not be blinded.  
37

### 38 **POC-US**

39 A POC-US (Butterfly iQ+, GM Medical) of the lungs will be performed bedside as Focused Lung US (FLUS) by study  
40 assistant within 24 hours after admission. FLUS is used to diagnose pneumothorax, pleural effusion and interstitial  
41 syndrome. Additionally, signs of pneumonia ie., liver like alveolar consolidation with shredded borders and air  
42 bronchograms will be described. Diagnostic criteria used are in accordance with international consensus(39, 40).  
43 FLUS will be conducted immediately before or after the CT scans. The FLUS result will not be available to the treating  
44 physician unless the result requires immediate action (pneumothorax or large pleural effusions).  
45  
46

47 A POC-US (Butterfly iQ+) of the kidneys will be conducted bedside by a study assistant within 24 hours after  
48 admission in order to assess whether hydronephrosis is present or absent. If present, the condition will be graded in  
49 grades 1, 2, 3 or 4(41). The result will not be available to the treating physician since the patient is examined by a  
50 radiologist immediately after, and the results from this examination is reported to the clinician according to standard  
51 care.  
52  
53

### 54 **ULDCT and HRCT**

55 The ULDCT and HRCT of the thorax scans are performed in the same scanning sequence, thus on the same scanner. A  
56 specially designed technical protocol is the basis of the ULDCT and will prior to inclusion through a minor pilot study  
57 be optimized at each site of inclusion to ensure uniform quality and dose. The radiological findings from ULDCT will  
58 be reported systematically using standardized assessment templates by radiologists. The HRCT will be performed  
59 according to standard protocols at each hospital, but only during inspiration to limit radiation dose. HRCT will be  
60 reference standard for FLUS and ULDCT and interpreted by lung expert radiologists. The reports from POC-US,  
61



11

1  
2 ULDCT, and HRCT respectively will be blinded. Study consultant radiologists with experience from ED patients will  
3 post-process report the ULDCT scans systematically using specially developed research report templates. The results  
4 of ULDCT and HRCT will be available to the treating physician within a week. If a result requires immediate action,  
5 the clinician will be contacted directly by the examiner (pneumothorax and large pleural effusions), according to  
6 standard care. If a participant is discharged before the scans have been performed, they will be offered the scan in  
7 an outpatient setting.  
8  
9

### 10 **CEUS and MRI**

11 A specialist US will be performed at the Radiology Department, including conventional grayscale US and CEUS with  
12 intravenous injection of 1.5 mL ultrasound contrast (Sonovue®, Bracco). At the same time, or as close as possible, a  
13 MRI without intravenous contrast of the kidneys will be conducted. The MRI will include the following sequences:  
14 planning, Dixon, T1 mapping, T2, T2 mapping, Diffusion ADC (100, 400, 800), MRI angio (3D VIBE), and Phase  
15 Contrast. The radiological findings will be described systematically using standardized assessment templates. The  
16 report from US and MRI respectively will be blinded. A renal expert radiologist will interpret the MRI and will post-  
17 process report the imaging systematically using specially developed research report templates. Imaging from the  
18 CEUS will be evaluated in an external postprocessing software algorithm (Vuebox, Bracco). The non-experimental  
19 results of the scans will be available to the treating physician within a week. If a result requires immediate action  
20 (suspicion of pyonephrosis or renal abscess), the clinician will be contacted directly by the examiner, according to  
21 standard care. If a participant is discharged before the scans have been performed, they will be offered the scans in  
22 an outpatient setting.  
23  
24  
25  
26  
27

### 28 **Expert panel reference standard**

29 Unless otherwise stated, the reference standard is the assigned diagnosis determined by a panel of experts. The  
30 panel consists of two consultants: a specialist in emergency medicine and a specialist in infectious medicine with  
31 considerable experience within acute infections. They will determine the final diagnosis based on all relevant  
32 information in medical records and study database available from the admission including routine blood analysis,  
33 blood/urine/sputum culturing, POC-PCR, routine and study imaging (including HRCT and MRI), and clinical  
34 information. The final diagnosis will be based on information available within the first week after admission. A  
35 standardized template in RedCap will be used (appendix VI), and the experts will register if the patient has an  
36 infectious disease, if the focus of infection is the lungs, kidneys or other, and specify the infection by adding an ICD-  
37 10 diagnosis code. If the patient has two focal diagnoses e.g. pneumonia and APN, the assessment will be based on  
38 what is the most probable cause of infection on admission. Conflicts will be discussed until consensus is reached. In  
39 this study we define APN as a urinary tract infection with typical local symptoms and systemic affection (i.e. fever,  
40 sepsis), thus indicating ascension of infection above the bladder.  
41  
42  
43  
44  
45

### 46 **Data collection and management**

47 All data will be collected in RedCap. Data will be pseudoanonymized and managed and analyzed using STATA or R in  
48 collaboration with a biostatistician  
49

50  
51 For each participant information on pre-defined clinical parameters upon arrival will be obtained from the medical  
52 record including symptoms, lifestyle factors signs, disease severity, vital parameters, triage at arrival, comorbidities,  
53 functional status, resident status, prior antibiotics prescriptions, and medical history.  
54

55 Other variables from the medical record that will be registered are length of stay, re-admission, admission to  
56 intensive care unit, prescribed antibiotic treatment, in-hospital mortality, 30-days and 90-days mortality, *Clostridium*  
57 *difficile* infections, and chest X-ray.  
58  
59

### 60 **Data monitoring**

12

1  
2 The daily inclusion of participants will be monitored by the steering committee and the numbers of inclusion will be  
3 communicated every week to emailed to the included centers. The primary analysis of data will be performed by the  
4 project assistants after the last patient has been included and all analysis performed. The results will be discussed  
5 and evaluated first in the steering committee and afterwards with all the included departments.  
6  
7

### 8 **Process auditing**

9 During data collection, an external assessor will supervise the performance of all project assistants and an  
10 independent radiology expert will ensure data quality. Intraobservability on POC-US will be performed each month.  
11  
12

13  
14 Overall risk for the participants in the randomized trial (POC-PCR sputum analysis) is minimal, as sputum collection is  
15 part of the standard care, and it will not affect the following diagnostic work-up. However the POC-PCR results may  
16 inform the clinician in a favorable way before onset of patient treatment. Any protocol deviation and/or  
17 unknown/unexpected adverse event, will be reported in RedCap, evaluated continuously by the steering committee,  
18 and reported to the treating physician and patient.  
19  
20

### 21 **Statistical analysis and plan**

22 According to the objectives, the study has been divided into sub-studies and for each the primary and secondary  
23 outcomes, statistical analysis, and sample size is presented.  
24  
25

#### 26 **Objective 1 - Patient characteristics and treatment trajectory**

27 This sub-study will include all participant. Patient characteristics associated to verified diagnosis will be presented  
28 with descriptive results, and logistic univariate and multivariate analysis will be carried out for selected risk  
29 indicators, including confounders in the final analysis. The primary outcome is the diagnosis of CAP and APN  
30 (determined by the expert panel reference standard). Secondary outcomes are length of stay, 30 days mortality, in-  
31 hospital mortality, admission to intensive care unit, readmission to hospital within 30 days from day of discharge.  
32  
33

34 At least 10 variables have to be analyzed, so at least 150 patients with a particular verified diagnosis are needed  
35 (50+10 events/variable).  
36  
37

#### 38 **Objective 2 - Diagnostic and prognostic accuracy of PCT and suPAR**

39 This diagnostic accuracy study will include all participants. Index tests are the concentration of CRP, PCT, and suPAR.  
40 The expert panel is the reference standard. Diagnostic accuracy tests will be performed as primary analysis, where  
41 the test positive of the reference standard is the diagnosis of CAP, and of urinary tract infection. Secondary  
42 prognostic tests will be performed, using the reference standard of 30 and 90 days mortality, in-hospital mortality,  
43 admission to intensive care, readmission to hospital within 30 days from day of discharge, and length of stay (LOS).  
44  
45

46 The test positively cut-offs of the index tests will be determined exploratory by performing Youden index analysis to  
47 estimate the best cut-off. The CRP value will be available for the members of the expert panel, but the PCT and  
48 suPAR will not be available. The reference standard results will not be available for the index test performers.  
49  
50

51 A demographic characteristic of the study populations will be presented, and the time interval of the laboratory  
52 analysis of the biomarkers will be reported. Cross-tabulation of the index test results by the reference standard  
53 results will be made including missing results, and used to determine diagnostic and prognostic accuracy expressed  
54 as sensitivity, specificity, predictive values, and likelihood ratios reported with 95% confidence intervals where  
55 appropriate. Receiver operating characteristic (ROC) analysis will be performed. Statistical modelling will also be  
56 performed to explore the effect of combining tests on diagnostic accuracy in order to identify the most accurate  
57 diagnostic strategy.  
58  
59  
60

13

1  
2  
3 The study is designed to be able to find a difference in area under the curve (AUC) from 0.7 to 0.8 between two  
4 tests, which requires 200 verified CAP cases and 200 controls (power 0.8, alpha 0.05, AUC below 0 hypothesis 0.7)  
5 and 150 verified pyelonephritis cases and 150 controls (power 0.8, alpha 0.05, AUC below 0-hypothesis 0.6) (42).  
6

### 7 **Objective 3 - Diagnostic accuracy of POC-UFC on diagnosing and excluding bacteriuria**

8  
9 This diagnostic accuracy study will include all participants. Index test is the POC-UFC and reference standard is the  
10 urine culture. The primary outcome is bacteriuria, defined as significant growth of any bacteria. A urine culture will  
11 be considered positive with a cut-off of > 1000 CFU/ml for uropathogens and >10.000 CFU/ml for others.  
12

13  
14 A secondary diagnostic test will be performed, where the reference standard is the expert panel assessment. The  
15 outcome is urinary tract infection. The test positive of the index test is bacteraemia combined with leukocytes.  
16

17  
18 The index test results will not be available for the performers of the reference standard test. The reference standard  
19 results will be available after the index test has been performed.  
20

21  
22 A demographic characteristic of the study populations will be presented. Cross-tabulation of the index test result by  
23 the reference standard results will be made including missing results, and used to determine diagnostic accuracy  
24 expressed as sensitivity, specificity, predictive values, and likelihood ratios reported with 95% confidence intervals  
25 where appropriate. Receiver operating characteristic (ROC) analysis will also be performed.  
26

27  
28 Urine culture shows significant growth of uropathogenic bacterium in approximately 50% of people with suspected  
29 APN(25). Asymptomatic bacteriuria accounts for about 20% in the elderly population, depending on gender and age  
30 (43), which among 1000 inpatients suspected of infection, of which 15% have APN, gives a sensitivity of 50% (95% CI:  
31 42-58 %) and a negative predictive value of 90% (95% CI: 77-83%). With the expectation of identifying at least 150  
32 cases of APN among our study population, an improvement in sensitivity to 70% (95% CI: 62-77%) and negative  
33 predictive value to 95% (95% CI: 93 -96%) could be found with 95% security.  
34

### 35 **Objective 4 – Addition of POC-PCR analysis of sputum to the diagnostic set-up for CAP on antibiotic prescribing**

36  
37 This RCT will include all participants in track A, who had a sputum sample collected. Intervention group: sputum  
38 samples analysed by POC-PCR. Control group: routine microbiology analysis. It is a superiority randomized trial.  
39 Primary outcome is targeted versus non-targeted antibiotic treatment prescribed at four hours after admission.  
40 Targeted treatment is defined as narrow spectrum antibiotics directed against CAP, antibiotics directed against a  
41 detected respiratory pathogen or no antibiotics (e.g. in the absence of a bacterial pathogen and/or presence of a  
42 viral pathogen) (appendix VII). Non-targeted treatment is defined as broad spectrum antibiotics not directed against  
43 a specific pathogen or antibiotics not directed against CAP. The analyses will follow the intention-to-treat principal  
44 and a hierarchical mixed effect logistic model will be utilized to analyze the primary outcome to accommodate the  
45 hierarchical structure of the random effect, which manifest according to different personnel collecting the samples  
46 and geographical variation.  
47  
48  
49

50  
51 Secondary outcomes are length of stay, 30 days mortality, in-hospital mortality, admission to intensive care unit,  
52 readmission to hospital within 30 days from day of discharge, and antibiotic treatment at 48 hours of admission. A  
53 reliability analysis for POC-PCR and routine culturing will be performed as secondary analysis calculating the Intra-  
54 class correlation coefficient  
55

56  
57 To achieve a power of 82% for the main analysis, 200 patients with suspected CAP must be included. To  
58 accommodate the bias presented by Gail et al (44) the generalized mixed effect models will be adjusted for strong  
59 predictors. If the sample size is not sufficient for a generalized mixed effect models the corresponding univariate  
60 analysis will be conducted.



14

**Objective 5 - Diagnostic accuracy of POC-US and ULDCT on diagnosing CAP**

This diagnostic accuracy study will include all participants in track A, who had the HRCT performed. Index test is the POC-US, ULDCT, and chest x-ray. The reference standard is HRCT. The primary outcome is inflammatory changes in the lungs compatible with CAP.

The index test results will not be available for the performers of the reference standard test. The reference standard results will be available after the index test has been performed.

A demographic characteristic of the study populations will be presented. Cross-tabulation of the index tests result by the reference standard results will be made including missing results, and used to determine diagnostic accuracy expressed as sensitivity, specificity, predictive values, and likelihood ratios reported with 95% confidence intervals where appropriate. Receiver operating characteristic (ROC) analysis will also be performed.

It is assumed that the reference standard will find 98% of the patients and index test 90%. With a power of 80%, at least 132 patients with verified CAP should be included (one-sided McNemar test).

**Objective 6 - Diagnostic accuracy of CEUS on diagnosing APN**

This diagnostic accuracy study will include all participants in track B, who had both the CEUS and MRI performed. Index test is the CEUS and reference standard is MRI. The primary outcome is the presence of renal inflammatory changes compatible with APN. The reference standard will be described by an expert radiologist, who before describing will be informed of some standardized clinical and paraclinical parameters (e.g. fever, CRP, flank pain, and relevant comorbidity), but will be blinded to the results of the other imaging investigations. The CEUS will be conducted and described by a consultant radiologist. The scans will be post process evaluated in the software VueBox. Each kidney is divided into an upper, middle and lower part for each, and these regions are compared in the evaluation of diagnostic agreement.

The index test results will not be available for reference standard performer and describer. The reference standard results will not be available for the index test performers.

A demographic characteristic of the study populations will be presented, and the time interval of the two scans will be reported. Cross-tabulation of the index test result by the reference standard results will be made including missing results, and used to determine diagnostic accuracy expressed as sensitivity, specificity, predictive values, and likelihood ratios reported with 95% confidence intervals where appropriate. Receiver operating characteristic (ROC) analysis will also be performed.

It is assumed that the reference standard finds 98% of patients and index test 90%. With a power of 80%, at least 132 patients must be included (one-sided McNemar test).

**Objective 7 - Diagnostic accuracy of POC-US in diagnosing hydronephrosis in patients suspected of APN**

This diagnostic accuracy study will include all participants in track B, who had both the POC-US and MRI successfully conducted. Index test is the POC-US and reference standard is MRI. The primary outcome is the presence of hydronephrosis. The reference standard is described by an expert radiologist. The POC-US will be evaluated by the executive study assistants.

The index test results will not be available for reference standard evaluator. The reference standard results will not be available for the index test performers.

A demographic characteristic of the study populations will be presented, and the time interval of the two scans will be reported. Cross-tabulation of the index test result by the reference standard results will be made including

15

missing results, and used to determine diagnostic accuracy expressed as sensitivity, specificity, predictive values, and likelihood ratios reported with 95% confidence intervals where appropriate. Receiver operating characteristic (ROC) analysis will also be performed.

It is assumed that the reference standard finds 98% of patients and index test 90%. With a power of 80%, at least 132 patients must be included (one-sided McNemar test).

### **Applicable to all sub-studies**

Annually, 5.7% of patients admitted to an ED are diagnosed with CAP and 2.4% with APNs (data from the ED at Hospital Sønderjylland). Taking into account exclusion criteria, weekends/holidays/missing data, and experience in patient recruitment, it is estimated that at least 1000 patients admitted with suspected infection must be included in the study, of which at least 200 patients will be diagnosed with pneumonia and at least 150 patients with APN.

No interim analysis will be made. Non-participant analysis is performed. For missing data multiple imputation is used. Any drop out during the study and the reason will be reported. It is anticipated that once the patients has consented, the drop-out rate will be minimal.

### **Ethics and dissemination**

The project was approved by the Regional Committees on Health Research Ethics for Southern Denmark (S-20200188), registered by the Danish Data Protection Agency (no. 20/60508) and by clinicaltrials.gov (NCT: 04661085, 04681963, 04667195, 04652167, 04686318, 04686292, 04651712, 04645030, and 04651244). Registration date was November–December 2020. Signed informed consent will be obtained from all participants after information of the project has been given both in writing and orally.

Participation in track A will contain additional imaging. Patients under the age of 40 are therefore excluded from the CT due to the extra risk of developing cancer from the radiation. A local hospital physicist has helped with the following calculations: A typical HRCT gives a radiation dose of approximately 2.2 mSv which corresponds to a cancer risk of 1:9100. An X-ray gives a radiation dose of approximately 0.06 mSv which corresponds to a cancer risk of 1:333330. An ULDCT gives a radiation dose of approximately 0.1 mSv which corresponds to a cancer risk of 1:200000. Participation in track A gives each participant approximately 2.26 mSv (ULDCT and HRCT) which corresponds to a cancer risk of 1:8850(45-48). The examination time of ULDCT and HRCT is approximately 10 minutes.

Use of US contrast in rare cases cause allergic reactions; less than 1/10.000 exponents require medical treatment due to allergic reaction (49). The examination time of advanced US is approximately 20 minutes.

MRI does not provide any radiation dose to the patients and is without intravenous contrast. The examination time is approximately 45 minutes, which is aligned with normal MRI examination time.

Overall, risks related to participation in the study is considered minimal, and furthermore, chances are that the additional diagnostic imaging will inform the clinician in a favorable way before the onset of patient treatment.

The treating staff informs the patients about relevant test results. All medical records including laboratory and imaging can be assessed by the patient via the Danish public healthcare web portal ([www.sundhed.dk](http://www.sundhed.dk))

### **Protocol amendments**

Important protocol modifications like changes in eligibility criteria or outcome will be communicated to the relevant parties, i.e. sponsor, trial registry, and scientific ethical committee, and explicit described in future publications.

### **Dissemination policy**

16

1  
2 The results of the study will be presented in English peer-reviewed recognized scientific journals. The results of the  
3 project will also be disseminated through participation in academic and other conferences, as well as through the  
4 printed and electronic press. The author panel will include the steering committee, project assistants, and local  
5 coordinators in accordance with the Vancouver criteria. No professional writers will be used. Positive, negative and  
6 inconclusive results will be published. Diagnostic accuracy studies will follow the guidelines for reporting diagnostic  
7 accuracy studies (STARD) (50), cross sectional studies will follow the guidelines for strengthening the reporting of  
8 observational studies in epidemiology (STROBE) (51), and randomized studies will follow the consolidated standards  
9 of reporting trials (CONSORT) (52).

### 13 Access to data

14 Only the members of the steering committee and project assistants will have access to the final trial dataset. Other  
15 researches may be granted access to the anonymized data for analysis on reasonable request to the corresponding  
16 authors.

## 21 Discussion

22 COVID-19 and the consequent societal lockdown might affect trial recruitment and patient distribution. This might  
23 lead to an extended recruitment period, as patients suspected of an infectious not related to COVID-19 may be  
24 admitted to other departments than the ED, so the ED will be able to handle the many COVID-19 patients. The  
25 lockdown may also reduce the number of infections in the society, so fewer patient will visit the hospital, and the  
26 distribution of the infections might differ since e.g. the airborne transmitted infections will be reduced. This  
27 challenge will especially sub-study 1 be aware of when presenting the results.

28  
29  
30 After completion of the study, a novel diagnostic algorithm will be developed. Subsequently, the plan is to test the  
31 algorithm in a national setting including at least eight EDs. The results can be implemented in daily work and  
32 routines. The study will also be able to characterize the patients, who are diagnosed at the ED with an infection of  
33 unknown origin and prescribed broad-spectrum antibiotics.

34  
35  
36 The study is only generalisable to settings where appropriately trained staff and equipment can perform POC-US,  
37 and well-resourced settings where a rapid POC-PCR and POC-UFC service is available.

38  
39  
40 The results of the study will have both national and international interest, as the challenges are common and the  
41 solutions can easily be applied in hospitals with a similar technological context. Securing rapid and reliable diagnosis  
42 of two of the most common infections diagnosed in the ED, will encourage the reduction of broad-spectrum  
43 antibiotics and thereby the development of multi-resistant bacteria.

## 47 Declarations

48  
49 **Abbreviations:** acute pyelonephritis (APN), Anatomical therapeutic chemical (ATC), area under the curve (AUC),  
50 community-acquired pneumonia (CAP), cluster of differentiation 4 (CD4), contrast enhanced ultrasound (CEUS),  
51 Coronavirus Disease 2019 (COVID-19), C-reactive protein (CRP), emergency department (ED), human  
52 immunodeficiency virus (HIV), high-resolution dose computed tomography (HRCT), magnetic resonance imaging  
53 (MRI), Objective Structured Assessment of US Skills (OASUS), polymerase-chain-reaction (PCR), serum procalcitonin  
54 (PCT), Point-of-care (POC), receiver operating characteristic (ROC), Soluble urokinase plasminogen activator receptor  
55 (suPAR), urine flow cytometry (UFC), ultralow dose computed tomography (ULDCT), and ultrasound (US).

56  
57  
58 **Protocol version:** January 25<sup>th</sup> 2021, version 1.0

59  
60 **Ethics approval:** The project was approved by the Regional Committees on Health Research Ethics for Southern  
Denmark (S-20200188), registered by the Danish Data Protection Agency (20/60508) and by clinicaltrials.gov (NCT:

17

04661085, 04681963, 04667195, 04652167, 04686318, 04686292, 04651712, 04645030, and 04651244). Each patient provided written informed consent.

**Data sharing statement:** Due to Danish laws on personal data, data cannot be shared publicly. To request these data, please contact the corresponding author for more information.

**Competing interests:** The authors declare that they have no competing interests

**Patient and Public Involvement:** The patients or public were not involved in the development of the research question or the study design.

**Funding:** This work was supported by the Region of Southern Denmark (Damhaven 12, 7100 Vejle, Denmark; kontakt@rsyd.dk) (grant number A583), University of Southern Denmark (Campusvej 55, 5230 Odense, Denmark; sdu@sdu.dk) (grant numbers 16/44667 and 17/10636), Hospital Sønderjylland (Kresten Philipsensvej 15, 6200 Aabenraa, Denmark, email shs.kontakt@rsyd.dk) (grant numbers 20/20505 and 21/9582). The financial sponsors had no influence on the data, analysis, results, or content of publication.

**Authors' contributions:** HS, OG, FSR, ERBP, CØ, CBL, TAS, SP, MBC, and CBM conceptualized and all authors designed the study and data collection in detail. HS, AH, MHL, MBC, and CBM reviewed the literature. AH, MHL, MBC, and MAH will recruit participants, and HS, OG, FSR, ERBP, CØ, CBL, TAS, SP, MBC, and CBM will supervise data collection and analysis. HS, AH, MHL, MBC, MAH, and CBM will carry out statistical analysis and write the first manuscripts, which will be critically reviewed by all authors, who will finally approve the manuscripts before submission. HS and CBM are responsible for the overall content as guarantors. The corresponding author attests that all listed authors meet authorship criteria and that no others meeting the criteria have been omitted.

**Steering committee:** Composed of representatives from the involved type of departments: emergency, microbiology, biochemistry, and radiology. The role of the committee is to develop the scientific framework of the study, make final decisions on major issues during the data collection and data management period. The committee is responsible for all financial issues. Members of the steering committee are HS, OG, FSR, ERBP, and CBM.

**Roles and responsibilities:** University Hospital of Southern Denmark is the legal sponsor. CBM is the study chief investigator (Christian.Backer.Mogensen@rsyd.dk), and HSA is the principal investigator.

**Participating departments:** All departments are located in Denmark  
Emergency Department, Hospital Sønderjylland, Aabenraa. Emergency Department, Hospital Lillebælt, Kolding.  
Emergency Department, Odense University Hospital, Odense.  
Radiology Department, Hospital Sønderjylland, Aabenraa. Radiology Department, Hospital Lillebælt, Kolding.  
Radiology Department, Odense University Hospital, Odense.  
Department of Microbiology, Hospital Sønderjylland, Sønderborg. Department of Clinical Microbiology, Lillebælt Hospital, Vejle. Department of Clinical Microbiology, Odense University Hospital, Odense.  
Bloodsamples, Biochemistry and Immunology, Hospital Sønderjylland, Aabenraa. Biochemistry and Immunology, Lillebælt Hospital, Kolding and Vejle. Clinical Biochemistry and Pharmacology, Odense University Hospital, Odense.

**Acknowledgements:** In performing our protocol, we received help and guidance from some respected persons, who deserve our greatest gratitude: Research Radiographer Bo Mussmann from Radiology Department at Odense University Hospital in Denmark, Professor Michael Pedersen from Department of Clinical Medicine at Aarhus University Hospital in Denmark, Professor Ivan Brandslund from Department of Clinical Biochemistry at Sygehus Lillebælt in Denmark, and Research assistant Mette Bach Nielsen from Emergency Department at Hospital Sønderjylland in Denmark.

## Literature references

1. WHO. Antimicrobial resistance - Global report and surveillance. France: World Health Organization; 2014.
2. Bager FE-I, J.; Larsen, AR.; Sönksen, UW. DANMAP 2018 - Use of antimicrobial agents and occurrence of antimicrobial resistance in bacteria from food animals, food and humans in Denmark. 2018.
3. Skjøt-Arkil H, Mogensen CB, Lassen AT, Johansen IS, Chen M, Petersen P, et al. Carrier prevalence and risk factors for colonisation of multiresistant bacteria in Danish emergency departments: a cross-sectional survey. *BMJ Open*. 2019;9(6):e029000.
4. Sundhedsstyrelsen. Vejledning om ordination af antibiotika. Copenhagen: Danish Health Organisation; 2012.
5. Sundhedsstyrelsen. Vejledning om forebyggelse af spredning af MRSA. 2016.
6. Sundhedsstyrelsen. Vejledning og forebyggelse af om spredning af CPO. 2018.
7. Ældreministeriet S-o. National handlingsplan for antibiotika til mennesker - tre målbare mål for en reduktion af antibiotikaforbruget frem mod 2020. 2017.
8. Hellesøe AM, CB.; Anhøj, J.; Jensen, JN.; Bak, H.; Ellermann-Eriksen, S.; Christian, T.; LKT Antibiotika afslutnings- og evalueringsrapport. 2019.
9. Cartuliales MB, Sundal LM, Gustavsson S, Skjøt-Arkil H, Mogensen CB. Limited value of sputum culture to guide antibiotic treatment in a Danish emergency department. *Dan Med J*. 2020;67(11).
10. Funk DJ, Kumar A. Antimicrobial therapy for life-threatening infections: speed is life. *Crit Care Clin*. 2011;27(1):53-76.
11. The top 10 causes of death: World Health Organization; 2018 [Available from: <https://www.who.int/news-room/fact-sheets/detail/the-top-10-causes-of-death> (accessed July 2019).
12. Kennedy M, Joyce N, Howell MD, Lawrence Mottley J, Shapiro NI. Identifying infected emergency department patients admitted to the hospital ward at risk of clinical deterioration and intensive care unit transfer. *Acad Emerg Med*. 2010;17(10):1080-5.
13. Chandra A, Nicks B, Maniago E, Nouh A, Limkakeng A. A multicenter analysis of the ED diagnosis of pneumonia. *Am J Emerg Med*. 2010;28(8):862-5.
14. Reed WW, Byrd GS, Gates RH, Jr., Howard RS, Weaver MJ. Sputum gram's stain in community-acquired pneumococcal pneumonia. A meta-analysis. *West J Med*. 1996;165(4):197-204.
15. Schuetz P, Christ-Crain M, Muller B. Procalcitonin and other biomarkers to improve assessment and antibiotic stewardship in infections--hope for hype? *Swiss Med Wkly*. 2009;139(23-24):318-26.
16. Savvateeva EN, Rubina AY, Gryadunov DA. Biomarkers of Community-Acquired Pneumonia: A Key to Disease Diagnosis and Management. *Biomed Res Int*. 2019;2019:1701276.
17. Hey J, Thompson-Leduc P, Kirson NY, Zimmer L, Wilkins D, Rice B, et al. Procalcitonin guidance in patients with lower respiratory tract infections: a systematic review and meta-analysis. *Clin Chem Lab Med*. 2018;56(8):1200-9.
18. Self WH, Balk RA, Grijalva CG, Williams DJ, Zhu Y, Anderson EJ, et al. Procalcitonin as a Marker of Etiology in Adults Hospitalized With Community-Acquired Pneumonia. *Clin Infect Dis*. 2017;65(2):183-90.
19. Hamie L, Daoud G, Nemer G, Nammour T, El Chediak A, Uthman IW, et al. SuPAR, an emerging biomarker in kidney and inflammatory diseases. *Postgrad Med J*. 2018;94(1115):517-24.
20. Masajtis-Zagajewska A, Nowicki M. New markers of urinary tract infection. *Clin Chim Acta*. 2017;471:286-91.
21. Caterino JM, Leininger R, Kline DM, Southerland LT, Khaliqdina S, Baugh CW, et al. Accuracy of Current Diagnostic Criteria for Acute Bacterial Infection in Older Adults in the Emergency Department. *J Am Geriatr Soc*. 2017;65(8):1802-9.
22. Bourcier JE, Paquet J, Seinger M, Gallard E, Redonnet JP, Cheddadi F, et al. Performance comparison of lung ultrasound and chest x-ray for the diagnosis of pneumonia in the ED. *Am J Emerg Med*. 2014;32(2):115-8.
23. Orso D, Guglielmo N, Copetti R. Lung ultrasound in diagnosing pneumonia in the emergency department: a systematic review and meta-analysis. *Eur J Emerg Med*. 2018;25(5):312-21.
24. Claeys KC, Blanco N, Morgan DJ, Leekha S, Sullivan KV. Advances and Challenges in the Diagnosis and Treatment of Urinary Tract Infections: the Need for Diagnostic Stewardship. *Curr Infect Dis Rep*. 2019;21(4):11.
25. Shallcross L, Gaskell K, Fox-Lewis A, Bergstrom M, Noursadeghi M. Mismatch between suspected pyelonephritis and microbiological diagnosis: a cohort study from a UK teaching hospital. *J Hosp Infect*. 2018;98(2):219-22.
26. Quiaia E, Correias JM, Mehta M, Murchison JT, Gennari AG, van Beek EJR. Gray Scale Ultrasound, Color Doppler Ultrasound, and Contrast-Enhanced Ultrasound in Renal Parenchymal Diseases. *Ultrasound Q*. 2018;34(4):250-67.
27. Mitterberger M, Pinggera GM, Colleselli D, Bartsch G, Strasser H, Steppan I, et al. Acute pyelonephritis: comparison of diagnosis with computed tomography and contrast-enhanced ultrasonography. *BJU Int*. 2008;101(3):341-4.



19

28. Kazmierski B, Deurdulian C, Tchelepi H, Grant EG. Applications of contrast-enhanced ultrasound in the kidney. *Abdom Radiol (NY)*. 2018;43(4):880-98.
29. Huang HS, Tsai CL, Chang J, Hsu TC, Lin S, Lee CC. Multiplex PCR system for the rapid diagnosis of respiratory virus infection: systematic review and meta-analysis. *Clin Microbiol Infect*. 2018;24(10):1055-63.
30. Long B, Koyfman A. The Emergency Department Diagnosis and Management of Urinary Tract Infection. *Emerg Med Clin North Am*. 2018;36(4):685-710.
31. Rowe TA, Juthani-Mehta M. Diagnosis and management of urinary tract infection in older adults. *Infect Dis Clin North Am*. 2014;28(1):75-89.
32. Institut SS. Urinvejsinfektioner: Blærebetændelse og nyrebækkenbetændelse Statens Serum Institut: Statens Serum Institut; 2017 [Available from: <https://www.ssi.dk/sygdomme-beredskab-og-forskning/sygdomsleksikon/u/urinvejsinfektioner> (Accessed April 2019)].
33. Herraes O, Asencio MA, Carranza R, Jarabo MM, Huertas M, Redondo O, et al. Sysmex UF-1000i flow cytometer to screen urinary tract infections: the URISCAM multicentre study. *Lett Appl Microbiol*. 2018;66(3):175-81.
34. Chan AW, Tetzlaff JM, Altman DG, Laupacis A, Gøtzsche PC, Krleža-Jerić K, et al. SPIRIT 2013 statement: defining standard protocol items for clinical trials. *Ann Intern Med*. 2013;158(3):200-7.
35. The Region of Southern Denmark traw. Den Regionale Antibiotikagruppe. Diagnostik og behandling af akutte infektioner på sygehusene i Region Syddanmark. 2016.
36. Skovsted TA, Petersen ERB, Fruekilde MB, Pedersen AK, Pielak T, Eugen-Olsen J. Validation of suPAR turbidimetric assay on Cobas® (c502 and c702) and comparison to suPAR ELISA. *Scand J Clin Lab Invest*. 2020;80(4):327-35.
37. BioFire. 2018. FilmArray Pneumonia panel instruction booklet RFIT-ASY0144/145. BioFire SLC, UT.
38. Harris PA, Taylor R, Thielke R, Payne J, Gonzalez N, Conde JG. Research electronic data capture (REDCap)—a metadata-driven methodology and workflow process for providing translational research informatics support. *Journal of biomedical informatics*. 2009;42(2):377-81.
39. Volpicelli G, Elbarbary M, Blaivas M, Lichtenstein DA, Mathis G, Kirkpatrick AW, et al. International evidence-based recommendations for point-of-care lung ultrasound. *Intensive Care Med*. 2012;38(4):577-91.
40. Laursen CB, Clive A, Hallifax R, Pietersen PI, Asciak R, Davidsen JR, et al. European Respiratory Society Statement on Thoracic Ultrasound. *Eur Respir J*. 2020.
41. Laursen BLG, O.; Davidsen, J. R. et. al. Basal klinisk ultralydsdiagnostik. Copenhagen: Munksgaard; 2017. Available from: <https://basal-klinisk-ultralydsdiagnostik.munksgaard.dk/>.
42. Biosoft. easyROC: a web-tool for ROC curve analysis [1.3.1:[Available from: <http://www.biosoft.hacettepe.edu.tr/easyROC/> (Accessed January 3rd 2020)].
43. Mody L, Juthani-Mehta M. Urinary tract infections in older women: a clinical review. *JAMA*. 2014;311(8):844-54.
44. GAIL MH, WIEAND S, PIANADOSI S. Biased estimates of treatment effect in randomized experiments with nonlinear regressions and omitted covariates. *Biometrika*. 1984;71(3):431-44.
45. Huda W, Ogden KM, Khorasani MR. Converting dose-length product to effective dose at CT. *Radiology*. 2008;248(3):995-1003.
46. Sodickson A, Baeyens PF, Andriole KP, Prevedello LM, Nawfel RD, Hanson R, et al. Recurrent CT, cumulative radiation exposure, and associated radiation-induced cancer risks from CT of adults. *Radiology*. 2009;251(1):175-84.
47. Brenner DJ, Hall EJ. Computed tomography--an increasing source of radiation exposure. *N Engl J Med*. 2007;357(22):2277-84.
48. Mayo-Smith WW, Hara AK, Mahesh M, Sahani DV, Pavlicek W. How I do it: managing radiation dose in CT. *Radiology*. 2014;273(3):657-72.
49. Chong WK, Papadopoulou V, Dayton PA. Imaging with ultrasound contrast agents: current status and future. *Abdom Radiol (NY)*. 2018;43(4):762-72.
50. Cohen JF, Korevaar DA, Altman DG, Bruns DE, Gatsonis CA, Hooft L, et al. STARD 2015 guidelines for reporting diagnostic accuracy studies: explanation and elaboration. *BMJ Open*. 2016;6(11):e012799.
51. Vandembroucke JP, von Elm E, Altman DG, Gøtzsche PC, Mulrow CD, Pocock SJ, et al. Strengthening the Reporting of Observational Studies in Epidemiology (STROBE): explanation and elaboration. *PLoS Med*. 2007;4(10):e297.
52. Moher D, Hopewell S, Schulz KF, Montori V, Gøtzsche PC, Devereaux PJ, et al. CONSORT 2010 explanation and elaboration: updated guidelines for reporting parallel group randomised trials. *BMJ*. 2010;340:c869.



Figure 1 Design of patient flow and diagnostic tracks

170x182mm (150 x 150 DPI)

1  
2  
3 **Appendix**  
4  
5

- 6 I. Informed consent materials
- 7 II. Biological specimens
- 8 III. Schedule of enrollment, interventions, and assessments
- 9 IV. Targets in POC-PCR
- 10 V. Recommended action list
- 11 VI. Template for reference standard
- 12 VII. Algorithm for antibiotic prescription
- 13
- 14
- 15
- 16
- 17
- 18
- 19
- 20
- 21
- 22
- 23
- 24
- 25
- 26
- 27
- 28
- 29
- 30
- 31
- 32
- 33
- 34
- 35
- 36
- 37
- 38
- 39
- 40
- 41
- 42
- 43
- 44
- 45
- 46
- 47
- 48
- 49
- 50
- 51
- 52
- 53
- 54
- 55
- 56
- 57
- 58
- 59
- 60

For peer review only



## Appendix I - Informed consent materials

Informed consent materials given to the participants has been developed in three versions – track A, B, and C, respectively. The written consent form can be found at the end of appendix I. It is all in Danish.

### Participant information - Track A

**Deltagerinformation om deltagelse i videnskabeligt forskningsprojekt for personer, der indlægges akut med mistanke om lungebetændelse**

## **Forbedret diagnostik af akutte infektioner**

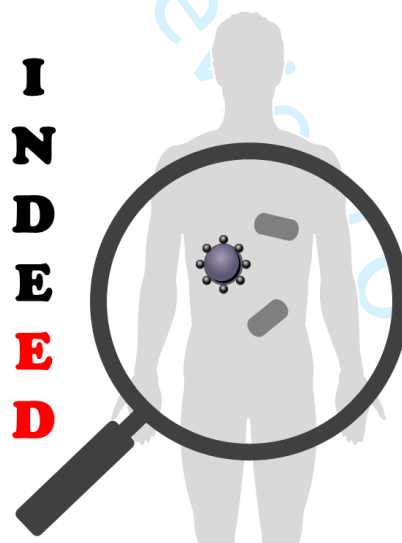

**Infectious Diagnostics in Emergency Departments (INDEED study)**

**Et samarbejdsprojekt på tværs af specialer på Sygehus Sønderjylland, Sygehus Lillebælt og Odense  
Universitetshospital med udgangspunkt i Akutafdelingerne**

1  
2  
3  
4  
5 *Vi vil spørge, om du vil deltage i et videnskabeligt projekt?*

6  
7 *Projektet handler om at blive bedre til at diagnosticere lungebetændelse på Akutafdelingen, så en*  
8 *målrettet behandling kan igangsættes så hurtigt som muligt.*

9  
10 *Før du beslutter, om du vil deltage i projektet, skal du fuldt ud forstå, hvad projektet går ud på, og*  
11 *hvorfor vi gennemfører det. Vi vil derfor bede dig om at læse denne deltagerinformation grundigt.*

12  
13 *Hvis du beslutter dig for at deltage, vil vi bede dig om at underskrive en samtykkeerklæring. Husk,*  
14 *at du har ret til at rådføre dig hos familie, venner eller bekendte. Du har også ret til betænkningstid*  
15 *før du underskriver, men da der er tale om en akut infektion, som kræver hurtig behandling, beder*  
16 *vi om, at du beslutter dig inden for 30 minutter.*

17  
18 *Det er frivilligt at deltage i projektet. Du kan når som helst og uden at give en grund trække dit*  
19 *samtykke tilbage. Hvis du trækker dit samtykke om deltagelse i projektet tilbage, vil det ikke få*  
20 *konsekvenser for din videre behandling.*

## 21 22 23 24 25 26 27 Projektets mål

28 De redskaber og undersøgelser, der eksisterer i dag til at diagnosticere lungebetændelse, har mange  
29 begrænsninger. Det udfordrer lægen i at stille en sikker diagnose inden for kort tid og igangsætte en  
30 målrettet behandling. Det kan få konsekvenser for den enkelte persons indlæggelsesforløb. Hvis man  
31 behandler med antibiotika som dækker flere bakterier end nødvendigt vil det også bidrage til udviklingen af  
32 bakterier, som er modstandsdygtige over for mange antibiotika.

33  
34  
35  
36 Projektet har derfor til formål at finde bedre redskaber, som kan hjælpe lægen til at stille en sikker  
37 diagnose inden for få timer for personer, indlagt akut med mistanke om lungebetændelse.

## 38 39 40 Det undersøger projektet

41 Projektet vil undersøge

- 42 • hvilke symptomer, tegn og forhold, der kendetegner lungebetændelse og sygdomsgraden
- 43 • hvilke markører for infektion i blodet, der bedst kan identificere en lungebetændelse og
- 44 sygdomsgraden
- 45 • om en ny metode til at måle bakterier i urinen er nyttig
- 46 • om en ny metode til at identificere bakterier i sekret fra lungerne er nyttigt
- 47 • om ultralydsundersøgelse og CT-skanning med meget lav strålingsrisiko kan bruges til at
- 48 diagnosticere lungebetændelse

## 49 50 51 52 53 Plan for projektet

54 Projektet foregår på Fælles Akutmodtagelsen i Aabenraa, Sygehus Sønderjylland, på Akutafdelingen i  
55 Kolding, Sygehus Lillebælt, og på Fælle Akut Modtagelsen i Odense, Odense Universitetshospital. Fra  
56  
57  
58  
59  
60

1  
2  
3  
4 februar 2021 til vinteren 2021/22 vil 500 voksne personer, som indlægges akut med mistanke om  
5 lungebetændelse på de tre akutafdelinger, blive inviteret til at deltage.  
6

7 Personalet vil i forbindelse med din indlæggelse opsøge og informere dig om projektet, og tilbyde  
8 deltagelse i projektet. Da det er vigtigt at en akut infektion bliver behandlet hurtigt, vil vi bede dig om at  
9 tilkendegive din beslutning inden for en halv time.  
10  
11

### 12 Det indebærer deltagelse i projektet for dig

13 Deltagelse i projektet betyder, at du vil modtage den normale behandling, afdelingen tilbyder, og  
14 derudover få foretaget ekstra undersøgelser.  
15  
16

17 Vi vil stille dig nogle spørgsmål omkring dine symptomer, tidligere og aktuelle sygdomme, og hvordan du  
18 har det. Vi beder i den forbindelse adgang til din patientjournal, for at følge op på eventuelle tidligere  
19 indlæggelser, den aktuelle indlæggelse, og eventuelle indlæggelser inden for den næste måned efter du er  
20 udskrevet.  
21  
22

23 Vi vil tage 14mL ekstra blod svarende til 2 ekstra rør, når du alligevel får taget blodprøve, og hjælpe dig med  
24 at aflevere en urinprøve.  
25  
26

27 Af det sekret fra lungerne, som der bliver taget ifølge normal behandling, vil vi tage en lille del fra nogle af  
28 projektpersonerne, og undersøge det med en ny metode.  
29

30 Det blod, urin og sekret fra lungerne, der indhentes til projektet, vil blive destrueret, når projektet er  
31 afsluttet.  
32  
33

34 Hvis du vælger at deltage, skal du have taget to ekstra skanninger af lungerne. 1) Ultralydsskanning som  
35 foretages på akutafdelingen og tager 5 min. 2) En CT-skanning som består af en skanning med meget lav  
36 strålingsrisiko, og en højopløselig CT-skanning, som er den mest præcise skanning, der benyttes på  
37 lungerne i dag. CT-skanningen vil i alt tage 10 min.  
38  
39

40 Dit samtykke vil give den forsøgsansvarlige, sponsor og dennes repræsentant direkte adgang til relevante  
41 helbredsoplysninger i journalen for at kunne gennemføre, overvåge og kontrollere projektet. I projektet vil  
42 behandlingen af personoplysninger følge databeskyttelsesloven og databeskyttelsesforordningen. Efter  
43 indsamling af de ønskede informationer vil dine persondata blive fjernet fra vores registreringsystem, og  
44 dit personnummer vil blive erstattet af en kode (pseudo-anonymisering).  
45  
46

### 47 Bivirkninger, risici, komplikationer og ulemper

48 Der er ingen eller kun få kendte risici eller bivirkninger ved at deltage i projektet. Alle  
49 prøvetagningsmetoder er velkendte og almindeligt anvendte procedurer, som vi har stor erfaring med og  
50 kendskab til. Der kan dog være risici ved undersøgelserne, som vi endnu ikke kender. Vi beder dig derfor  
51 om at fortælle, hvis du oplever problemer i forbindelse med prøvetagning og undersøgelser. Hvis vi  
52 opdager bivirkninger, som vi ikke allerede har fortalt dig om, vil du naturligvis blive orienteret med det  
53 samme, og du vil skulle tage stilling til, om du ønsker at fortsætte med prøvetagning og undersøgelser.  
54  
55  
56  
57  
58  
59  
60

De ekstra blodprøver til projektet tages i forbindelse med de blodprøver, der alligevel tages ved indlæggelse. Risici og bivirkninger ved at få taget en blodprøve kan være ubehageligt, lette smerter og/eller blå mærker, og i nogle tilfælde besvimelse. I sjældne tilfælde kan der opstå en mindre blodansamling eller betændelse ved indstiksstedet.

Urinprøven kan som regel afleveres i et bæger, opsamlet ved toiletbesøg. Er du kateterbærer eller på grund af sygdom ikke selv kan lade vandet, kan det blive nødvendigt at hjælpe vandladningen på vej med et kateter, som er et tyndt plastikrør til indførsel i blæren via urinrøret. Denne procedure kan give let ubehag og eventuelt kortvarig mindre blødning fra slimhinderne.

Skanningerne er ikke forbundet med smerte, men du kan eventuelt opleve ubehag ved flytningen til CT-skanneren. Væsentligste risiko i forbindelse med deltagelse i projektet er den ekstra stråledosis som CT-skanningen medfører. Den ekstra stråledosis, du udsættes for, udgør i alt lidt mindre end den baggrundstråling, som du normalt udsættes for i løbet af et år. Strålingen fra skanningen medfører en let øget risiko for udvikling kræft på ca. 0,01-0,1% og svarer til, at den samlede livstidsrisiko for kræft stiger fra 25% til 25,1%. Denne risiko vurderes dog betydningsløs i forhold til de risici, der i øvrigt er ved din aktuelle indlæggelse.

### Dine prøvesvar

Ønsker du svar på de almindelige blod- og urinundersøgelser, kan du se det på [www.sundhed.dk](http://www.sundhed.dk). Svar på de ekstra blod- og urinundersøgelser i projektet vil ikke fremkomme her, da vi ikke kender betydningen af resultaterne endnu. Har svarene et alarmerende resultat, vil den behandlende læge få besked og vil vurdere, om det har betydning for din behandling. Resultatet af den ekstra undersøgelse af sekret fra lungerne, som der vil kunne blive lavet i projektet, vil lægen, der behandler dig, blive orienteret om.

Skanningsresultaterne vil være synlige for lægerne, der behandler dig, og indgå i deres vurdering og behandling. Hvis vi skulle opdage noget, der kunne give os mistanke om andre sygdomme (f.eks. kræft), vil vi via din læge kontakte dig og tilbyde yderligere udredning. Bidrager skanningerne ikke med viden, der ændrer på din behandling eller diagnose, hører du ikke nærmere til skanningsresultatet.

### Nytte ved projektet

Projektet er vigtigt for at vi fremadrettet kan gøre indlæggelsesforløbet for personer, der indlægges akut med mistanke om lungebetændelse, bedre. Projektet vil have en afgørende betydning for praksis på akutafdelingerne, og formentlig hvilken type antibiotika lægen ordinerer. Et mere målrettet antibiotikaforbrug vil bidrage til reduktion af bakterier, der er modstandsdygtige over for antibiotika, og dermed sikre at infektioner i fremtiden også kan behandles med antibiotika.

For dig personligt, vil deltagelse ikke umiddelbart have en betydning for dit behandlingsforløb. Hvis der skulle ske at være nogle særlige komplikationer til din aktuelle sygdom relateret til lungerne, vil vi dog med de ekstra scanninger formentlig hurtigere erkende dette.

### Udelukkelse fra undersøgelse

Du vil udgå af dele af projektet, hvis nogle af undersøgelserne mislykkes af fx tekniske grunde eller hvis din behandlende læge vurderer, at det er for risikabelt for dig at deltage.

## Adgang til projektets resultater

Projektets samlede resultater vil blive offentliggjort 2024 i videnskabelige tidsskrifter samt på sygehusenes hjemmesider. Resultater med relevans for beslutningstagere i sundhedsvæsenet vil blive offentliggjort i danske medier og tidsskrifter. Det sikres, at ingen deltagere kan genkendes i det, som offentliggøres. Har du interesse i at vide mere om projektets resultater, kan du efter offentliggørelse opsøge dem via <http://www.sygehussonderjylland.dk/wm521282>.

*Vi håber, at du med denne information har fået tilstrækkeligt indblik i, hvad det vil sige at deltage i projektet, og at du føler dig rustet til at tage beslutningen om din eventuelle deltagelse. Hvis du vil vide mere, er du meget velkommen til at kontakte os. Information om dine rettigheder er vedlagt denne deltagerinformation sidst i dokumentet (Bilag 1).*

*Hvis du beslutter dig for at deltage i projektet, vil vi bede dig om at underskrive samtykkeerklæringen. Du kan vælge om du vil give samtykke til hele projektet eller kun dele af projektet. Det er frivilligt at deltage i projektet, og du kan når som helst og uden at give en grund trække dit samtykke tilbage. Det vil ikke få konsekvenser for den videre behandling.*

*Yderligere oplysninger kan fås ved henvendelse til*

Professor og overlæge Christian Backer Mogensen  
Fælles Akutmodtagelsen, Sygehus Sønderjylland  
Kresten Philipsens Vej 15 - 6200 Aabenraa  
[Christian.Backer.Mogensen@rsyd.dk](mailto:Christian.Backer.Mogensen@rsyd.dk)  
Tlf: 79971123

### **Initiativtagere til projektet**

*Projektet er primært udarbejdet i samarbejde mellem Akutafdeling, Biokemisk Afdeling og Mikrobiologisk Afdeling, og Radiologisk Afdeling på Sygehus Sønderjylland, Sygehus Lillebælt og Odense Universitets Hospital. Projektet er forankret på Sygehus Sønderjylland og Institut for Regional Sundhedsforskning på Syddansk Universitet, som er ansøgnings- og bevillingsansvarlige.*

### **Økonomisk støtte til projektet**

*Projektet har fået økonomisk støtte i form af ph.d. stipendiat fra Syddansk Universitet (1.650.000kr), ph.d.-stipendiat fra Sygehus Sønderjylland (4.800.000kr) samt støtte til drift fra Region Syddanmark (500.000kr). Forsøgsansvarlige har ingen økonomisk tilknytning til støttegivere eller andre interessenter i forsøget. Der vil ikke være en økonomisk kompensation til patienter, der deltager i projektet.*

## Participant information - Track B

Deltagerinformation om deltagelse i videnskabeligt forskningsprojekt for personer, der indlægges akut med mistanke om nyrebækkenbetændelse

## Forbedret diagnostik af akutte infektioner



**Infectious Diagnostics in Emergency Departments (INDEED study)**

**Et samarbejdsprojekt på tværs af specialer på Sygehus Sønderjylland, Sygehus Lillebælt og Odense  
Universitetshospital med udgangspunkt i Akutafdelingerne**

1  
2  
3  
4  
5 *Vi vil spørge, om du vil deltage i et videnskabeligt projekt?*

6  
7 *Projektet handler om at blive bedre til at diagnosticere akut nyrebækkenbetændelse på*  
8 *Akutaafdelingen, så en målrettet behandling kan igangsættes så hurtigt som muligt.*

9  
10 *Før du beslutter, om du vil deltage i projektet, skal du fuldt ud forstå, hvad projektet går ud på, og*  
11 *hvorfor vi gennemfører det. Vi vil derfor bede dig om at læse denne deltagerinformation grundigt.*

12  
13 *Hvis du beslutter dig for at deltage, vil vi bede dig om at underskrive en samtykkeerklæring. Husk,*  
14 *at du har ret til at rådføre dig hos familie, venner eller bekendte. Du har også ret til betænkningstid*  
15 *før du underskriver, men da der er tale om en akut infektion, som kræver hurtig behandling, beder*  
16 *vi om, at du beslutter dig inden for 30 minutter.*

17  
18 *Det er frivilligt at deltage i projektet. Du kan når som helst og uden at give en grund trække dit*  
19 *samtykke tilbage. Hvis du trækker dit samtykke om deltagelse i projektet tilbage, vil det ikke få*  
20 *konsekvenser for din videre behandling.*

## 21 22 23 24 25 26 27 Projektets mål

28 De redskaber og undersøgelser, der eksisterer i dag til at diagnosticere nyrebækkenbetændelse, har mange  
29 begrænsninger. Det udfordrer lægen i at stille en sikker diagnose inden for kort tid og igangsætte en  
30 målrettet behandling. Det kan få konsekvenser for den enkelte persons indlæggelsesforløb. Hvis man  
31 behandler med antibiotika som dækker flere bakterier end nødvendigt vil det også bidrage til udviklingen af  
32 bakterier, som er modstandsdygtige over for mange antibiotika.

33  
34  
35  
36 Projektet har derfor til formål at finde bedre redskaber, som kan hjælpe lægen til at stille en sikker  
37 diagnose inden for få timer for personer, indlagt akut med mistanke om akut nyrebækkenbetændelse.

## 38 39 40 Det undersøger projektet

41 Projektet vil undersøge

- 42 • hvilke symptomer, tegn og forhold, der kendetegner nyrebækkenbetændelse og sygdomsgraden
- 43 • hvilke markører for infektion i blodet, der bedst kan identificere en nyrebækkenbetændelse og
- 44 sygdomsgraden
- 45 • om en ny metode til at måle bakterier i urinen er nyttig
- 46 • om ultralydsundersøgelse med og uden kontrastvæske kan bidrage til at diagnosticere
- 47 nyrebækkenbetændelse
- 48
- 49
- 50
- 51

## 52 53 Plan for projektet

54 Projektet foregår på Fælles Akutmodtagelsen i Aabenraa, Sygehus Sønderjylland, på Akutaafdelingen i  
55 Kolding, Sygehus Lillebælt, og på Fælle Akut Modtagelsen i Odense, Odense Universitetshospital. Fra  
56 februar 2021 til vinteren 2021/22 vil 300 voksne personer, som indlægges akut med mistanke om  
57 nyrebækkenbetændelse på de tre akutaafdelinger, blive inviteret til at deltage.  
58  
59  
60



Personalet vil i forbindelse med din indlæggelse opsøge og informere dig om projektet, og tilbyde deltagelse i projektet. Da det er vigtigt at en akut infektion bliver behandlet hurtigt, vil vi bede dig om at tilkendegive din beslutning inden for en halv time.

### Det indebærer deltagelse i projektet for dig

Deltagelse i projektet betyder, at du vil modtage den normale behandling, afdelingen tilbyder, og derudover få foretaget ekstra undersøgelser.

Vi vil stille dig nogle spørgsmål omkring dine symptomer, tidligere og aktuelle sygdomme, og hvordan du har det. Vi beder i den forbindelse adgang til din patientjournal, for at følge op på eventuelle tidligere indlæggelser, den aktuelle indlæggelse, og eventuelle indlæggelser inden for den næste måned efter du er udskrevet.

Vi vil tage 14mL ekstra blod svarende til 2 ekstra rør, når du alligevel får taget blodprøve, og hjælpe dig med at aflevere en urinprøve.

Det blod og urin, der indhentes til projektet, vil blive destrueret, når projektet er afsluttet.

Vi vil tilbyde dig tre ekstra skanninger af nyrerne. 1) Ultralydsskanning som foretages på akutafdelingen og tager 5 min. 2) Ultralydsskanning, hvor der sprøjtes kontrastvæske ind i dine blodårer, og som foretages af en røntgenlæge. Skanningen tager 20 min. 3) MR-skanning af røntgenlægen, og som tager 45 min. Det tilstræbes, at skanningerne foretages i forbindelse med din indlæggelse. Hvis du udskrives før, kan det være nødvendigt, at du møder op til skanningerne dagen efter.

Dit samtykke vil give den forsøgsansvarlige, sponsor og denne repræsentant direkte adgang til relevante helbredsoplysninger i journalen for at kunne gennemføre, overvåge og kontrollere projektet. I projektet vil behandlingen af personoplysninger følge databeskyttelsesloven og databeskyttelsesforordningen. Efter indsamling af de ønskede informationer vil dine persondata blive fjernet fra vores registreringsystem, og dit personnummer vil blive erstattet af en kode (pseudo-anonymisering).

### Bivirkninger, risici, komplikationer og ulemper

Der er ingen eller kun få kendte risici eller bivirkninger ved at deltage i projektet. Alle prøvetagningsmetoder er velkendte og almindeligt anvendte procedurer, som vi har stor erfaring med og kendskab til. Der kan dog være risici ved undersøgelserne, som vi endnu ikke kender. Vi beder dig derfor om at fortælle, hvis du oplever problemer i forbindelse med prøvetagning og undersøgelser. Hvis vi opdager bivirkninger, som vi ikke allerede har fortalt dig om, vil du naturligvis blive orienteret med det samme, og du vil skulle tage stilling til, om du ønsker at fortsætte med prøvetagning og undersøgelser.

De ekstra blodprøver til projektet tages i forbindelse med de blodprøver, der alligevel tages ved indlæggelse. Risici og bivirkninger ved at få taget en blodprøve kan være ubehageligt, lette smerter og/eller blå mærker, og i nogle tilfælde besvimelse. I sjældne tilfælde kan der opstå en mindre blodansamling eller betændelse ved indstiksstedet.

Urinprøven kan som regel afleveres i et bæger, opsamlet ved toiletbesøg. Er du kateterbærer eller på grund af sygdom ikke selv kan lade vandet, kan det blive nødvendigt at hjælpe vandladningen på vej med et



kateter, som er et tyndt plastikrør til indførsel i blæren via urinrøret. Denne procedure kan give let ubehag og eventuelt kortvarig mindre blødning fra slimhinderne.

Det kontraststof, der bruges til ultralydsskanningen, består overvejende af små luftbobler. Det er ikke farligt for kroppen. Der kan opstå milde, kortvarige bivirkninger som fx hovedpine, svimmelhed, ændret smags- og lugtesans. Dette ses hos 0,5-5 %. I meget sjældne tilfælde kan man udvikle en allergisk reaktion, når stoffet sprøjtes ind i blodårerne. Disse alvorlige reaktioner er beskrevet hos mindre end 1/16.500. Du vil derfor blive observeret i 20 minutter efter skanningen, for at se om der skulle opstå bivirkninger eller allergisk reaktion.

MR-skanningen kan godt føles som lang tid. Skanningen er larmende og du har derfor høreværn på. Der er *ingen* strålebelastning eller andre påvirkninger af kroppen forbundet med en MR-skanning.

### Dine prøvesvar

Ønsker du svar på de almindelige blod- og urinundersøgelser, kan du se det på [www.sundhed.dk](http://www.sundhed.dk). Svar på de ekstra blod- og urinundersøgelser i projektet vil ikke fremkomme her, da vi ikke kender betydningen af resultaterne endnu. Har svarene et alarmerende resultat, vil den behandlende læge få besked og vil vurdere, om det har betydning for din behandling.

Skanningsresultaterne vil være synlige for lægerne, der behandler dig, og indgå i deres vurdering og behandling. Hvis vi skulle opdage noget, der kunne give os mistanke om andre sygdomme (f.eks. kræft), vil vi via din læge kontakte dig og tilbyde yderligere udredning. Bidrager skanningerne ikke med viden, der ændrer på din behandling eller diagnose, hører du ikke nærmere til skanningsresultatet.

### Nytte ved projektet

Projektet er vigtigt for at vi fremadrettet kan gøre indlæggelsesforløbet for personer, der indlægges akut med mistanke om nyrebækkenbetændelse, bedre. Projektet vil have en afgørende betydning for praksis på akutafdelingerne, og formentlig hvilken type antibiotika lægen ordinerer. Et mere målrettet antibiotikaforbrug vil bidrage til reduktion af bakterier, der er modstandsdygtige over for antibiotika, og dermed sikre at infektioner i fremtiden også kan behandles med antibiotika.

For dig personligt, vil deltagelse ikke umiddelbart have en betydning for dit behandlingsforløb. Hvis der skulle ske at være nogle særlige komplikationer til din aktuelle sygdom relateret til nyrerne, vil vi dog med de ekstra skanninger formentlig hurtigere erkende dette.

### Udelukkelse fra undersøgelse

Du vil udgå af dele af projektet, hvis nogle af undersøgelserne mislykkes af fx tekniske grunde eller hvis din behandlende læge vurderer, at det er for risikabelt for dig at deltage.

### Adgang til projektets resultater

Projektets samlede resultater vil blive offentliggjort 2024 i videnskabelige tidsskrifter samt på sygehusenes hjemmesider. Resultater med relevans for beslutningstagere i sundhedsvæsenet vil blive offentliggjort i danske medier og tidsskrifter. Det sikres, at ingen deltagere kan genkendes i det, som offentliggøres. Har du interesse i at vide mere om projektets resultater, kan du efter offentliggørelse opsøge dem via <http://www.sygehussonderjylland.dk/wm521282>.

1  
2  
3  
4  
5  
6 *Vi håber, at du med denne information har fået tilstrækkeligt indblik i, hvad det vil sige at deltage i*  
7 *projektet, og at du føler dig rustet til at tage beslutningen om din eventuelle deltagelse. Hvis du vil*  
8 *vide mere, er du meget velkommen til at kontakte os. Information om dine rettigheder er vedlagt*  
9 *denne deltagerinformation sidst i dokumentet (Bilag 1).*

10  
11 *Hvis du beslutter dig for at deltage i projektet, vil vi bede dig om at underskrive*  
12 *samtykkeerklæringen. Du kan vælge om du vil give samtykke til hele projektet eller kun dele af*  
13 *projektet. Det er frivilligt at deltage i projektet, og du kan når som helst og uden at give en grund*  
14 *trække dit samtykke tilbage. Det vil ikke få konsekvenser for den videre behandling.*

15  
16  
17  
18  
19 *Yderligere oplysninger kan fås ved henvendelse til*

20  
21 Professor og overlæge Christian Backer Mogensen  
22 Fælles Akutmodtagelsen, Sygehus Sønderjylland  
23 Kresten Philipsens Vej 15 - 6200 Aabenraa  
24 [Christian.Backer.Mogensen@rsyd.dk](mailto:Christian.Backer.Mogensen@rsyd.dk)  
25 Tlf: 79971123  
26  
27  
28  
29  
30

### 31 **Initiativtagere til projektet**

32 *Projektet er primært udarbejdet i samarbejde mellem Akutafdeling, Biokemisk Afdeling og Mikrobiologisk Afdeling, og*  
33 *Radiologisk Afdeling på Sygehus Sønderjylland, Sygehus Lillebælt og Odense Universitets Hospital. Projektet er*  
34 *forankret på Sygehus Sønderjylland og Institut for Regional Sundhedsforskning på Syddansk Universitet, som er*  
35 *ansøgnings- og bevillingsansvarlige.*

### 36 **Økonomisk støtte til projektet**

37  
38 *Projektet har fået økonomisk støttet i form af ph.d. stipendiater fra Syddansk Universitet (1.650.000kr), ph.d.-*  
39 *stipendiater fra Sygehus Sønderjylland (4.800.000kr) samt støtte til drift fra Region Syddanmark (500.000kr).*  
40 *Forsøgsansvarlige har ingen økonomisk tilknytning til støttegivere eller andre interessenter i forsøget. Der vil ikke være*  
41 *en økonomisk kompensation til patienter, der deltager i projektet.*  
42  
43  
44  
45  
46  
47  
48  
49  
50  
51  
52  
53  
54  
55  
56  
57  
58  
59  
60

Participant information - Track C

Deltagerinformation om deltagelse i videnskabeligt forskningsprojekt for personer, der indlægges akut med mistanke om infektion

## Forbedret diagnostik af akutte infektioner



Infectious Diagnostics in Emergency Departments (INDEED study)

Et samarbejdsprojekt på tværs af specialer på Sygehus Sønderjylland, Sygehus Lillebælt og Odense Universitetshospital med udgangspunkt i Akutafdelingerne

1  
2  
3  
4  
5 *Vi vil spørge, om du vil deltage i et videnskabeligt projekt?*

6  
7 *Projektet handler om at blive bedre til at diagnosticere akutte infektioner på Akutafdelingen, så en*  
8 *målrettet behandling kan igangsættes så hurtigt som muligt.*

9  
10 *Før du beslutter, om du vil deltage i projektet, skal du fuldt ud forstå, hvad projektet går ud på, og*  
11 *hvorfor vi gennemfører det. Vi vil derfor bede dig om at læse denne deltagerinformation grundigt.*

12  
13 *Hvis du beslutter dig for at deltage, vil vi bede dig om at underskrive en samtykkeerklæring. Husk,*  
14 *at du har ret til at rådføre dig hos familie, venner eller bekendte. Du har også ret til betænkningstid*  
15 *før du underskriver, men da der er tale om en akut infektion, som kræver hurtig behandling, beder*  
16 *vi om, at du beslutter dig inden for 30 minutter.*

17  
18 *Det er frivilligt at deltage i projektet. Du kan når som helst og uden at give en grund trække dit*  
19 *samtykke tilbage. Hvis du trækker dit samtykke om deltagelse i projektet tilbage, vil det ikke få*  
20 *konsekvenser for din videre behandling.*

## 21 22 23 24 25 26 27 Projektets mål

28 De redskaber og undersøgelser, der eksisterer i dag til at finde ud af, hvilken type infektion, der er skyld i  
29 indlæggelsen på Akutmodtagelsen, har mange begrænsninger. Det udfordrer lægen i at stille en sikker  
30 diagnose inden for kort tid og igangsætte en målrettet behandling. Det kan få konsekvenser for den enkelte  
31 persons indlæggelsesforløb. Hvis man behandler med antibiotika som dækker flere bakterier end  
32 nødvendigt vil det også bidrage til udviklingen af bakterier, som er modstandsdygtige over for mange  
33 antibiotika.

34  
35  
36  
37 Projektet har derfor til formål at finde bedre redskaber, som kan hjælpe lægen til at stille en sikker  
38 diagnose inden for få timer for personer, indlagt akut med mistanke om infektion.

## 39 40 41 Det undersøger projektet

42  
43 Projektet vil undersøge

- 44 • hvilke symptomer, tegn og forhold, der kendetegner de forskellige typer af infektioner og  
45 sygdomsgraden
- 46 • hvilke markører for infektion i blodet, der bedst kan angive typen af infektion og sygdomsgraden
- 47 • om en ny metode til at måle bakterier i urinen er nyttig

## 48 49 50 51 Plan for projektet

52  
53 Projektet foregår på Fælles Akutmodtagelsen i Aabenraa, Sygehus Sønderjylland, på Akutafdelingen i  
54 Kolding, Sygehus Lillebælt, og på Fælle Akut Modtagelsen i Odense, Odense Universitetshospital. Fra  
55 februar 2021 til vinteren 2021/22 vil 1000 voksne personer, som indlægges akut med mistanke om  
56 infektion på de tre akutafdelinger, blive inviteret til at deltage.

1  
2  
3  
4 Personalet vil i forbindelse med din indlæggelse opsøge og informere dig om projektet, og tilbyde  
5 deltagelse i projektet. Da det er vigtigt at en akut infektion bliver behandlet hurtigt, vil vi bede dig om at  
6 tilkendegive din beslutning inden for en halv time.  
7  
8

### 9 Det indebærer deltagelse i projektet for dig

10 Deltagelse i projektet betyder, at du vil modtage den normale behandling, afdelingen tilbyder, og  
11 derudover få foretaget ekstra undersøgelser.  
12  
13

14 Vi vil stille dig nogle spørgsmål omkring dine symptomer, tidligere og aktuelle sygdomme, og hvordan du  
15 har det. Vi beder i den forbindelse adgang til din patientjournal, for at følge op på eventuelle tidligere  
16 indlæggelser, den aktuelle indlæggelse, og eventuelle indlæggelser inden for den næste måned efter du er  
17 udskrevet.  
18  
19

20 Vi vil tage 14mL ekstra blod svarende til 2 ekstra rør, når du alligevel får taget blodprøve, og hjælpe dig med  
21 at aflevere en urinprøve.  
22  
23

24 Det blod og urin, der indhentes til projektet, vil blive destrueret, når projektet er afsluttet.  
25

26 Dit samtykke vil give den forsøgsansvarlige, sponsor og denne repræsentant direkte adgang til relevante  
27 helbredsoplysninger i journalen for at kunne gennemføre, overvåge og kontrollere projektet. I projektet vil  
28 behandlingen af personoplysninger følge databeskyttelsesloven og databeskyttelsesforordningen. Efter  
29 indsamling af de ønskede informationer vil dine persondata blive fjernet fra vores registreringsystem, og  
30 dit personnummer vil blive erstattet af en kode (pseudo-anonymisering).  
31  
32

### 33 Bivirkninger, risici, komplikationer og ulemper

34 Der er ingen eller kun få kendte risici eller bivirkninger ved at deltage i projektet. Alle  
35 prøvetagningsmetoder er velkendte og almindeligt anvendte procedurer, som vi har stor erfaring med og  
36 kendskab til. Der kan dog være risici ved undersøgelserne, som vi endnu ikke kender. Vi beder dig derfor  
37 om at fortælle, hvis du oplever problemer i forbindelse med prøvetagning og undersøgelser. Hvis vi  
38 opdager bivirkninger, som vi ikke allerede har fortalt dig om, vil du naturligvis blive orienteret med det  
39 samme, og du vil skulle tage stilling til, om du ønsker at fortsætte med prøvetagning og undersøgelser.  
40  
41  
42  
43

44 De ekstra blodprøver til projektet tages i forbindelse med de blodprøver, der alligevel tages ved  
45 indlæggelse. Risici og bivirkninger ved at få taget en blodprøve kan være ubehageligt, lette smerter  
46 og/eller blå mærker, og i nogle tilfælde besvimelse. I sjældne tilfælde kan der opstå en mindre  
47 blodansamling eller betændelse ved indstiksstedet.  
48  
49

50 Urinprøven kan som regel afleveres i et bæger, opsamlet ved toiletbesøg. Er du kateterbærer eller på grund  
51 af sygdom ikke selv kan lade vandet, kan det blive nødvendigt at hjælpe vandladningen på vej med et  
52 kateter, som er et tyndt plastikrør til indførsel i blæren via urinrøret. Denne procedure kan give let ubehag  
53 og eventuelt kortvarig mindre blødning fra slimhinderne.  
54  
55  
56  
57  
58  
59  
60

## Dine prøvesvar

Ønsker du svar på de almindelige blod- og urinundersøgelser, kan du se det på [www.sundhed.dk](http://www.sundhed.dk). Svar på de ekstra blod- og urinundersøgelser i projektet vil ikke fremkomme her, da vi ikke kender betydningen af resultaterne endnu. Har svarene et alarmerende resultat, vil den behandlende læge få besked og vil vurdere, om det har betydning for din behandling.

## Nytte ved projektet

Projektet er vigtigt for at vi fremadrettet kan gøre indlæggelsesforløbet for personer, der indlægges akut med mistanke om infektion, bedre. Projektet vil have en afgørende betydning for praksis på akutafdelingerne, og formentligt hvilken type antibiotika lægen ordinerer. Et mere målrettet antibiotikaforbrug vil bidrage til reduktion af bakterier, der er modstandsdygtige over for antibiotika, og dermed sikre at infektioner i fremtiden også kan behandles med antibiotika.

For dig personligt, vil deltagelse ikke have en betydning for dit behandlingsforløb, da resultaterne af undersøgelserne først vil blive evalueret når projektet er afsluttet på akutafdelingen.

## Udelukkelse fra undersøgelse

Du vil udgå af dele af projektet, hvis nogle af undersøgelserne mislykkes af fx tekniske grunde

## Adgang til projektets resultater

Projektets samlede resultater vil blive offentliggjort 2024 i videnskabelige tidsskrifter samt på sygehusenes hjemmesider. Resultater med relevans for beslutningstagere i sundhedsvæsenet vil blive offentliggjort i danske medier og tidsskrifter. Det sikres, at ingen deltagere kan genkendes i det, som offentliggøres. Har du interesse i at vide mere om projektets resultater, kan du efter offentliggørelse opsøge dem via <http://www.sygehussonderjylland.dk/wm521282>.

*Vi håber, at du med denne information har fået tilstrækkeligt indblik i, hvad det vil sige at deltage i projektet, og at du føler dig rustet til at tage beslutningen om din eventuelle deltagelse. Hvis du vil vide mere, er du meget velkommen til at kontakte os. Information om dine rettigheder er vedlagt denne deltagerinformation sidst i dokumentet (Bilag 1).*

*Hvis du beslutter dig for at deltage i projektet, vil vi bede dig om at underskrive samtykkeerklæringen. Du kan vælge om du vil give samtykke til hele projektet eller kun dele af projektet. Det er frivilligt at deltage i projektet, og du kan når som helst og uden at give en grund trække dit samtykke tilbage. Det vil ikke få konsekvenser for den videre behandling.*

*Yderligere oplysninger kan fås ved henvendelse til*

Professor og overlæge Christian Backer Mogensen  
Fælles Akutmodtagelsen, Sygehus Sønderjylland  
Kresten Philipsens Vej 15 - 6200 Aabenraa  
[Christian.Backer.Mogensen@rsyd.dk](mailto:Christian.Backer.Mogensen@rsyd.dk)  
Tlf: 79971123

**Initiativtagere til projektet**

Projektet er primært udarbejdet i samarbejde mellem Akutafdeling, Biokemisk Afdeling og Mikrobiologisk Afdeling, og Radiologisk Afdeling på Sygehus Sønderjylland, Sygehus Lillebælt og Odense Universitets Hospital. Projektet er forankret på Sygehus Sønderjylland og Institut for Regional Sundhedsforskning på Syddansk Universitet, som er ansøgnings- og bevillingsansvarlige.

**Økonomisk støtte til projektet**

Projektet har fået økonomisk støttet i form af ph.d. stipendiat fra Syddansk Universitet (1.650.000kr), ph.d.-stipendiat fra Sygehus Sønderjylland (4.800.000kr) samt støtte til drift fra Region Syddanmark (500.000kr). Forsøgsansvarlige har ingen økonomisk tilknytning til støtteeivere eller andre interessenter i forsøget. Der vil ikke være en økonomisk kompensation til patienter, der deltager i projektet.

## Bilag 1: Forsøgspersoners rettigheder i et sundhedsvidenskabeligt forskningsprojekt

Som deltager i et sundhedsvidenskabeligt forskningsprojekt skal du vide, at:

- din deltagelse i forskningsprojektet er helt frivillig og kun kan ske efter, at du har fået både skriftlig og mundtlig information om forskningsprojektet og underskrevet samtykkeerklæringen.
- du til enhver tid mundtligt, skriftligt eller ved anden klar tilkendegivelse kan trække dit samtykke til deltagelse tilbage og udtræde af forskningsprojektet. Såfremt du trækker dit samtykke tilbage påvirker dette ikke din ret til nuværende eller fremtidig behandling eller andre rettigheder, som du måtte have.
- du har ret til at tage et familiemedlem, en ven eller en bekendt med til informations samtalen.
- du har ret til betænkningstid, før du underskriver samtykkeerklæringen.
- oplysninger om dine helbredsforhold, øvrige rent private forhold og andre fortrolige oplysninger om dig, som fremkommer i forbindelse med forskningsprojektet, er omfattet af tavshedspligt. behandling af oplysninger om dig, herunder oplysninger i dine blodprøver og væv, sker efter reglerne i databeskyttelsesforordningen, databeskyttelsesloven samt sundhedsloven. Den dataansvarlige i forsøget skal orientere dig nærmere om dine rettigheder efter databeskyttelsesreglerne.
- der er mulighed for at få aktindsigt i forsøgsprotokoller efter offentlighedslovens bestemmelser. Det vil sige, at du kan få adgang til at se alle papirer vedrørende forsøgets tilrettelæggelse, bortset fra de dele, som indeholder forretningshemmeligheder eller fortrolige oplysninger om andre.
- der er mulighed for at klage og få erstatning efter reglerne i lov om klage- og erstatningsadgang inden for sundhedsvæsenet. Hvis der under forsøget skulle opstå en skade kan du henvende dig til Patienterstatningen, se nærmere på [www.patienterstatningen.dk](http://www.patienterstatningen.dk).

Dette tillæg er udarbejdet af det Videnskabetiske komitéssystem og kan vedhæftes den skriftlige information om det sundhedsvidenskabelige forskningsprojekt. Spørgsmål til et konkret projekt skal rettes til projektets forsøgsansvarlige. Generelle spørgsmål til forsøgspersoners rettigheder kan rettes til den komité, som har godkendt projektet.

Revideret 21. september 2019



Written consent form – track A, B, and C

*Informeret samtykke til at deltage i et sundhedsvidenskabeligt projekt*

**Forbedret diagnostik af akutte infektioner**  
**- Infectious Diseases in Emergency Departments (INDEED study)**

**Erklæring fra forsøgspersonen:**

Jeg har fået skriftlig og mundtlig information, og jeg ved nok om formål, metode, fordele og ulemper til at sige ja til at deltage.

Jeg ved, at det er frivilligt at deltage, og jeg altid kan trække mit samtykke tilbage uden at miste mine nuværende eller fremtidige rettigheder til behandling.

Jeg giver hermed samtykke til at deltage i projektet og har fået en kopi af dette samtykkeark samt en kopi af den skriftlige information om projektet til eget brug.

Forsøgspersonens navn: \_\_\_\_\_

Forsøgspersonens Cpr-nummer: \_\_\_\_\_

Dato: \_\_\_\_\_ Underskrift: \_\_\_\_\_

Hvis der kommer nye væsentlige helbredsoplysninger frem om dig i forskningsprojektet vil du blive informeret. Vil du **frabede** dig information om nye væsentlige helbredsoplysninger, som kommer frem i forskningsprojektet, bedes du markere her: \_\_\_\_\_ (sæt x)

**Erklæring fra den, der afgiver information:**

Jeg erklærer, at forsøgspersonen har modtaget mundtlig og skriftlig information om forsøget.

Efter min overbevisning er der givet tilstrækkelig information til, at der kan træffes beslutning om deltagelse i forsøget.

Navnet på den, der har afgivet information:

Dato: \_\_\_\_\_ Underskrift: \_\_\_\_\_

Appendix II - Biological specimens

In this study, blood will be collected for analysis of serum procalcitonin (PCT) and Serum soluble urokinase plasminogen activator receptor (suPAR) and for a research biobank to store blood until analysis is feasible.

|                        | Blood for analysis of PCT and suPAR                                                                                                                                                                                                                                                                                                                                                                                                                                                                                                                                                                                                                                                                                                                                                                                                                                                                                                                                                                                   | Blood for research biobank                                                                                                                                                                                                                 |
|------------------------|-----------------------------------------------------------------------------------------------------------------------------------------------------------------------------------------------------------------------------------------------------------------------------------------------------------------------------------------------------------------------------------------------------------------------------------------------------------------------------------------------------------------------------------------------------------------------------------------------------------------------------------------------------------------------------------------------------------------------------------------------------------------------------------------------------------------------------------------------------------------------------------------------------------------------------------------------------------------------------------------------------------------------|--------------------------------------------------------------------------------------------------------------------------------------------------------------------------------------------------------------------------------------------|
| <b>Collection</b>      | The blood will be collected in an EDTA plasma tube.                                                                                                                                                                                                                                                                                                                                                                                                                                                                                                                                                                                                                                                                                                                                                                                                                                                                                                                                                                   | Biobank blood is only collected for patient in track A and includes one tube of EDTA plasma and one tube of LiHeparin plasma.                                                                                                              |
| <b>Storage</b>         | <p>At two of the sites, the analysis will be performed within is tested within two hours from the collection of the blood sample. At the third site, samples will be stored locally in a -80 °C freezer.</p> <p>The samples are pseudonymized with a code to protect the identity of the participants. All samples and code lists are stored safely and separately to prevent unauthorized access.</p>                                                                                                                                                                                                                                                                                                                                                                                                                                                                                                                                                                                                                | All samples will be stored locally in a -80 °C freezer. The samples are pseudonymized with a code to protect the identity of the participants. All samples and code lists are stored safely and separately to prevent unauthorized access. |
| <b>Sample analysis</b> | <p><i>Serum procalcitonin (PCT)</i></p> <p>Serum PCT concentration is quantified with an automated sandwich immunoassay “ECLIA” (Elecsys®, BRAHMS PCT-analyses) on Cobas e801. Calibration is performed after Cobas e pack has been registered in the instrument and is standardized to the BRAHMS PCT LIA assay. The correlation of Elecsys BRAHMS PCT analyses has been compared to BRAHMS PCT LIA and to BRAHMS PCT sensitive KRYPTOR with similar results of r=0.981 and r=0.988 respectively.</p> <p>Quality control is performed after each calibration and regularly following the standard procedure. The manufacture states a lower limit of detection 0.02 µg/L up to 100 µg/L. The functional assay sensitivity is identified at ≤ 0.06 ng/mL. In this study a range from 0.06 µg/L to 100 µg/L will be measured. Normal healthy individuals have a PCT concentration &lt; 0.1 µg/L. All plasma samples are screened for potential interfering substances like bilirubin, hemoglobin and lipids and no</p> | Molecular analysis for future use in ancillary studies will take place after all samples have been collected.                                                                                                                              |

|  |                                                                                                                                                                                                                                                                                                                                                                                                                                                                                                                                                                                                                                                                                                                                                                                                                                                                                                                                                                                                                                                                                                                                                                                                                                                                                                                                                                                                                                                                                                                                                                                                                                                                                                                                                                                         |  |
|--|-----------------------------------------------------------------------------------------------------------------------------------------------------------------------------------------------------------------------------------------------------------------------------------------------------------------------------------------------------------------------------------------------------------------------------------------------------------------------------------------------------------------------------------------------------------------------------------------------------------------------------------------------------------------------------------------------------------------------------------------------------------------------------------------------------------------------------------------------------------------------------------------------------------------------------------------------------------------------------------------------------------------------------------------------------------------------------------------------------------------------------------------------------------------------------------------------------------------------------------------------------------------------------------------------------------------------------------------------------------------------------------------------------------------------------------------------------------------------------------------------------------------------------------------------------------------------------------------------------------------------------------------------------------------------------------------------------------------------------------------------------------------------------------------|--|
|  | <p>results will be included with significant interference. There is no hook-effect in PCT concentrations measured up to 1000 µg/L.</p> <p>The precision of PCT assay is expected to be &lt;3% CV or similar. This is estimated from the internal quality controls using PC PCT1 (lot.419495) and PC PCT2 (lot.419497) at target PCT levels 0.49 and 9.44 ng/L showing a precision of 2.67 % CV and 2.63 % CV, respectively.</p>                                                                                                                                                                                                                                                                                                                                                                                                                                                                                                                                                                                                                                                                                                                                                                                                                                                                                                                                                                                                                                                                                                                                                                                                                                                                                                                                                         |  |
|  | <p><i>Serum soluble urokinase plasminogen activator receptor (suPAR)</i></p> <p>Serum suPAR is measured using suPARnostic® Tubilatex assay reagents (validated on Cobas® c111) protocol for Cobas® c702 and c502 applying the Multi-Pack cassettes (Roche Diagnostics, Mannheim, Germany) (42). Calibration is performed at least once a month or in connection to a new batch of TurbiLatex reagents, after calibration a quality control is performed.</p> <p>Measure range of the suPARnostic® Tubilatex assay is 1.8 µg/L to 16.0 µg/L on Cobas® c502 analyzer. The assay's limit of blank, limit of detection and limit of quantification are 1.0 µg/L, 1.2 µg/L and 1.2 µg/L respectively. Expected values for patients attending ED's range from 3-6 µg/L and can reach double digits in patients with severe disease related to poor prognosis. High concentration of SuPAR above 20 µg/L may be false positive results related with interference used by high concentration of hemoglobin, lipids or bilirubin. There is no identified interference in concentrations of bilirubin &gt;350 µmol/L, triglycerides &gt; 3.3g/L, hemoglobin &gt; 1.4 g/L or rheumatoid factor &gt; 440 IU/mL. The highest concentration of suPAR is tested at 47.5 µg/L without hook-effect and the linearity is from 1.8 µg/L to 26.6 µg/L. The mean value of precision of the test is 3.4 µg/L, 7.1 µg/L, 10.2 µg/L for low, middle and high concentrations of SuPAR respectively. The accuracy of suPARnostic® Tubilatex is compared with suPARnostic® ELISA with similar results &lt; 15 % of difference.</p> <p>The precision of suPAR assay is expected to be &lt; 5% CV or similar. This is estimated from external quality assessment material, HK 19 (Product code 2226 DK, Lot. No.</p> |  |

1  
2  
3  
4  
5  
6  
7  
8  
9  
10  
11  
12  
13  
14  
15  
16  
17  
18  
19  
20  
21  
22  
23  
24  
25  
26  
27  
28  
29  
30  
31  
32  
33  
34  
35  
36  
37  
38  
39  
40  
41  
42  
43  
44  
45  
46

|                   |                                                                                                                                                                                                                                          |                                                                                                                                                                                                                                                                                                                                         |
|-------------------|------------------------------------------------------------------------------------------------------------------------------------------------------------------------------------------------------------------------------------------|-----------------------------------------------------------------------------------------------------------------------------------------------------------------------------------------------------------------------------------------------------------------------------------------------------------------------------------------|
|                   | 201808) analyzed repeatedly during five different days on c502 and c702 and the mean content of suPAR determined by turbidimetry was 2.15 mg/ L and 2.03 mg/L (CV% 4.56 and 5.52) for the Cobas c502 and c702 instruments, respectively. |                                                                                                                                                                                                                                                                                                                                         |
| <b>Evaluation</b> | The results will be saved in a study database and not be visible for the physician in the medical journal.                                                                                                                               | The results will be saved in a study database.<br><br>The expiry date of the research biobank is expected to be October 2022. After expiry date, the remaining material in the research bank will be destroyed.                                                                                                                         |
| <b>Location</b>   | Samples will be located at Bloodsamples, Biochemistry and Immunology, University Hospital of Southern Denmark, Aabenraa, Denmark                                                                                                         | Samples will be located at:<br><br>- Bloodsamples, Biochemistry and Immunology, University Hospital of Southern Denmark, Aabenraa, Denmark<br><br>- Biochemistry and Immunology, University Hospital of Southern Denmark, Kolding, Denmark<br><br>- Clinical Biochemistry and Pharmacology, Odense University Hospital, Odense, Denmark |

## Appendix III - Schedule of enrollment, interventions and assessments

|                                   | STUDY PERIOD |            |                 |     |      |      |     |     |           |     |     |
|-----------------------------------|--------------|------------|-----------------|-----|------|------|-----|-----|-----------|-----|-----|
|                                   | RECRUITMENT  | ALLOCATION | POST-ALLOCATION |     |      |      |     |     | CLOSE-OUT |     |     |
| TIMEPOINT<br>(h=hours, d=days)    | -½h          | 0h         | <1h             | <4h | <24h | <48h | <5d | <7d | <14d      | 30d | 90d |
| <b>ENROLMENT</b>                  |              |            |                 |     |      |      |     |     |           |     |     |
| Eligibility screen                | x            |            |                 |     |      |      |     |     |           |     |     |
| Informed consent                  | x            |            |                 |     |      |      |     |     |           |     |     |
| Physician assessment              | x            |            |                 |     |      |      |     |     |           |     |     |
| Allocation                        |              | x          |                 |     |      |      |     |     |           |     |     |
| <b>INTERVENTIONS – all tracks</b> |              |            |                 |     |      |      |     |     |           |     |     |
| Collection of blood sample        |              |            | x               |     |      |      |     |     |           |     |     |
| • PCT analysis                    |              |            |                 |     |      |      |     |     | x         |     |     |
| • suPAR analysis                  |              |            |                 |     |      |      |     |     | x         |     |     |
| Collection of urine sample        |              |            |                 | x   |      |      |     |     |           |     |     |

|                                                                                        |  |  |  |   |   |   |  |  |   |  |  |
|----------------------------------------------------------------------------------------|--|--|--|---|---|---|--|--|---|--|--|
| • POC-UFC analysis                                                                     |  |  |  | x |   |   |  |  |   |  |  |
| <b>INTERVENTIONS – track A</b>                                                         |  |  |  |   |   |   |  |  |   |  |  |
| Collection of sputum sample                                                            |  |  |  | x |   |   |  |  |   |  |  |
| • POC-PCR analysis and presented to the treating physician                             |  |  |  |   | x |   |  |  |   |  |  |
| POC-US                                                                                 |  |  |  |   |   | x |  |  |   |  |  |
| ULDCT and HRCT                                                                         |  |  |  |   |   | x |  |  |   |  |  |
| <b>INTERVENTIONS – track B</b>                                                         |  |  |  |   |   |   |  |  |   |  |  |
| CEUS                                                                                   |  |  |  |   |   | x |  |  |   |  |  |
| POC-US                                                                                 |  |  |  |   |   | x |  |  |   |  |  |
| MRI                                                                                    |  |  |  |   |   | x |  |  |   |  |  |
| <b>ASSESSMENTS</b>                                                                     |  |  |  |   |   |   |  |  |   |  |  |
| Collection of patient characteristic (patient interview and look up in medical record) |  |  |  |   | x |   |  |  |   |  |  |
| CRP results                                                                            |  |  |  |   | x |   |  |  |   |  |  |
| Dipstick result                                                                        |  |  |  |   | x |   |  |  |   |  |  |
| Urine routine culturing result                                                         |  |  |  |   |   |   |  |  | x |  |  |

1  
2  
3  
4  
5  
6  
7  
8  
9  
10  
11  
12  
13  
14  
15  
16  
17  
18  
19  
20  
21  
22  
23  
24  
25  
26  
27  
28  
29  
30  
31  
32  
33  
34  
35  
36  
37  
38  
39  
40  
41  
42  
43  
44  
45  
46

1  
2  
3  
4  
5  
6  
7  
8  
9  
10  
11  
12  
13  
14  
15  
16  
17  
18  
19  
20  
21  
22  
23  
24  
25  
26  
27  
28  
29  
30  
31  
32  
33  
34  
35  
36  
37  
38  
39  
40  
41  
42  
43  
44  
45  
46

|                                         |  |  |  |   |  |   |   |   |  |  |   |
|-----------------------------------------|--|--|--|---|--|---|---|---|--|--|---|
| Sputum routine culturing and PCR result |  |  |  |   |  |   |   | x |  |  |   |
| Antibiotic prescription                 |  |  |  | x |  | x | x |   |  |  |   |
| Expert panel reference standard         |  |  |  |   |  |   |   | x |  |  |   |
| Length of stay                          |  |  |  |   |  |   |   |   |  |  | x |
| Mortality                               |  |  |  |   |  |   |   |   |  |  | x |
| Admission to ICU and readmission        |  |  |  |   |  |   |   |   |  |  | x |

For peer review only



## Appendix IV - Targets in POC-PCR

The BIOFIRE® FILMARRAY® Pneumonia plus Panel is testing for 27 of the most common pathogens involved in Lower respiratory tract infections and 7 genetic markers of antibiotic resistance.

| Bacteria (semi quantitative)                         | Antibiotic Resistance Genes  |
|------------------------------------------------------|------------------------------|
| <i>Acinetobacter calcoaceticus-baumannii</i> complex | <b>ESBL</b>                  |
| <i>Enterobacter cloacae</i>                          | CTX-M                        |
| <i>Escherichia coli</i>                              |                              |
| <i>Haemophilus influenzae</i>                        | <b>Carbapenemases</b>        |
| <i>Klebsiella aerogenes</i>                          | KPC                          |
| <i>Klebsiella oxytoca</i>                            | NDM                          |
| <i>Klebsiella pneumoniae</i> group                   | Oxa48-like                   |
| <i>Moraxella catarrhalis</i>                         | VIM                          |
| <i>Proteus</i> spp.                                  | IMP                          |
| <i>Pseudomonas aeruginosa</i>                        |                              |
| <i>Serratia marcescens</i>                           | <b>Methicilin Resistance</b> |
| <i>Staphylococcus aureus</i>                         | mecA/mecC and MREJ           |
| <i>Streptococcus agalactiae</i>                      |                              |
| <i>Streptococcus pneumoniae</i>                      |                              |
| <i>Streptococcus pyogenes</i>                        |                              |

| Atypical Bacteria (Qualitative) | Viruses                                                 |
|---------------------------------|---------------------------------------------------------|
| <i>Legionella pneumophila</i>   | Influenza A                                             |
| <i>Mycoplasma pneumoniae</i>    |                                                         |
| <i>Chlamydia pneumoniae</i>     | Influenza B                                             |
|                                 | Adenovirus                                              |
|                                 | Coronavirus                                             |
|                                 | Parainfluenza virus                                     |
|                                 | Respiratory Syncytial virus                             |
|                                 | Human Rhinovirus/Enterovirus                            |
|                                 | Human Metapneumovirus                                   |
|                                 | Middle East Respiratory Syndrome Coronavirus (MERS-CoV) |

## Appendix V – recommended action list

# Guidance of results from POC-PCR *FilmArray® Pneumonia Panel plus*

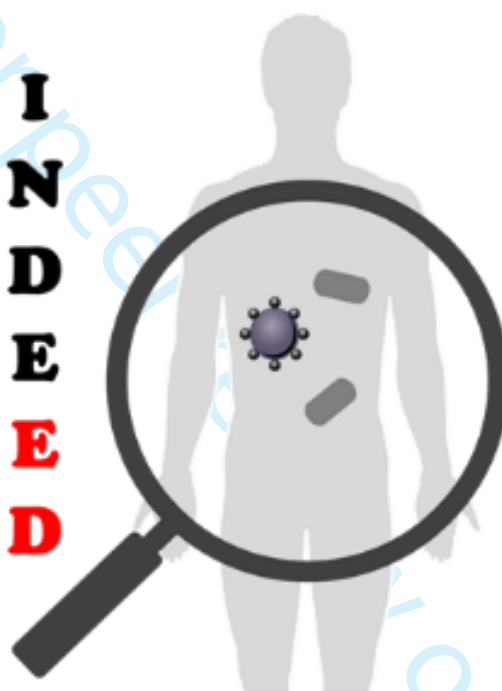

This guidance is developed to the INDEED-study (Infectious diseases in Emergency Department).

Emergency department physicians from Hospital Sønderjylland in Aabenraa, Hospital Lillebælt in Kolding, and Odense University Hospital in Odense, will receive this action card along with the results from sputum sample analyses.

In case of doubt in the interpretation of the results, the physician is encouraged to contact the local clinical microbiologist.

| Agens                                                        | Association with CAP#        | Remarks                                                                                                                                                                      | Antibiotics                                                                                                                                                       |                                                                                                                |
|--------------------------------------------------------------|------------------------------|------------------------------------------------------------------------------------------------------------------------------------------------------------------------------|-------------------------------------------------------------------------------------------------------------------------------------------------------------------|----------------------------------------------------------------------------------------------------------------|
|                                                              |                              |                                                                                                                                                                              | First choice                                                                                                                                                      | Penicillin allergy                                                                                             |
| <i>Streptococcus pneumoniae</i> *                            | Frequent and likely pathogen | Part of the normal microbiota in upper respiratory tract.                                                                                                                    | Benzylpenicillin 1.2g (2 mill.IE) x4 i.v.<br><i>or</i><br>Phenoxymethylpenicillin 0.6g (1 mill.IE) x4 oral                                                        | Cefuroxime 1.5g x 3 i.v.<br><i>or</i><br>Roxithromycin 300mg x1 oral                                           |
| <i>Haemophilus influenzae</i> *                              | Frequent and likely pathogen | May be contamination with pharyngeal microbiota.                                                                                                                             | Ampicillin 2g x4 i.v.<br><i>or</i><br>Benzylpenicillin 1.2g (2 mill. IE) x4 i.v.<br><i>or</i><br>Piv-ampicillin 1g x3 oral<br><i>or</i><br>Amoxicillin 1g x3 oral | Cefuroxime 1.5g x 3 i.v.<br><i>or</i><br>Doxycycline 100mg x2 first 24 hours oral followed by 100mg x1 oral    |
| <i>Streptococcus pyogenes</i> *                              | Probable, but rare pathogen  | Part of the normal microbiota in upper respiratory tract.                                                                                                                    | Benzylpenicillin 1.2g (2 mill. IE) x4 i.v.                                                                                                                        | Cefuroxime 1.5g x3 i.v.                                                                                        |
| <i>Streptococcus agalactiae</i> *                            | Rare pathogen in adults      | These pathogens relatively often represent contamination with pharyngeal microbiota.                                                                                         | Benzylpenicillin 1.2g (2 mill. IE) x4 i.v.                                                                                                                        | Cefuroxime 1.5g x3 i.v.                                                                                        |
| <i>Staphylococcus aureus</i> *                               | Probable, but rare pathogen  | Infection caused by <i>Streptococcus pyogenes</i> or <i>Staphylococcus aureus</i> will usually results in severe pneumonia.                                                  | Cloxacillin 1g x4 i.v.                                                                                                                                            | Cefuroxime 1.5g x3 i.v.                                                                                        |
| <i>Moraxella catarrhalis</i> *                               | Probable pathogen            |                                                                                                                                                                              | Piperacillin-tazobactam 4/0.5g x3 i.v.<br><i>or</i><br>amoxicillin-clavulanic acid 500/125mg x3 oral                                                              | Cefuroxime 1.5g x3 i.v.<br><i>or</i><br>Roxithromycin 300mg x1 oral<br><i>or</i><br>Azithromycin 500mg x1 oral |
| <i>Legionella pneumophila</i><br><i>Mycoplasma pneumonia</i> | Likely causative pathogen    | Is not a part of the normal respiratory microbiota.                                                                                                                          | Azithromycin 500mg x1 i.v./oral                                                                                                                                   |                                                                                                                |
| <i>Chlamydia pneumoniae</i>                                  | Probable causative pathogen  | Is not a part of the normal respiratory microbiota<br>Will usually cause mild infections. In case of severe infection, other pathogens/super-infection should be considered. | Azithromycin 500mg x1 i.v./oral                                                                                                                                   |                                                                                                                |

| Agens                                                                                                                                                                                                                                                                                                                                                                 | Association with CAP#                                                                                                                                                                                                                                                                      | Remarks                                                                                                                                                                                                          | Antibiotics                                                                                                                                              |
|-----------------------------------------------------------------------------------------------------------------------------------------------------------------------------------------------------------------------------------------------------------------------------------------------------------------------------------------------------------------------|--------------------------------------------------------------------------------------------------------------------------------------------------------------------------------------------------------------------------------------------------------------------------------------------|------------------------------------------------------------------------------------------------------------------------------------------------------------------------------------------------------------------|----------------------------------------------------------------------------------------------------------------------------------------------------------|
| <p><i>Pseudomonas aeruginosa</i>*</p> <p><i>Acinetobacter calcoaceticus-baumannii complex</i>*</p> <p><i>Enterobacter cloacae</i>*</p> <p><i>Escherichia coli</i>*</p> <p><i>Klebsiella (Enterobacter) aerogenes</i>*</p> <p><i>Klebsiella oxytoca</i>*</p> <p><i>Klebsiella pneumoniae group</i>*</p> <p><i>Proteus spp.</i>*</p> <p><i>Serratia marcescens</i>*</p> | <p>Very rare causative pathogens</p>                                                                                                                                                                                                                                                       | <p>These findings usually represents colonization.</p>                                                                                                                                                           | <p>These findings should typically not lead to adjustment of empirical antimicrobial treatment.</p>                                                      |
| <p>Influenza A</p> <p>Influenza B</p>                                                                                                                                                                                                                                                                                                                                 | <p>Frequent pathogens</p>                                                                                                                                                                                                                                                                  | <p>Is not a part of the normal respiratory microbiota Bacterial superinfection can occur.</p>                                                                                                                    |                                                                                                                                                          |
| <p>Parainfluenza virus</p> <p>Respiratory Syncytial</p> <p>Adenovirus</p> <p>Coronavirus<br/>(does not include SARS-CoV-2)</p> <p>Human Rhinovirus/Enterovirus</p> <p>Human Metapneumovirus</p>                                                                                                                                                                       | <p>Probable pathogens</p>                                                                                                                                                                                                                                                                  | <p>Usually causes mild infections. In case of severe infection, other pathogens / superinfection should be considered.</p> <p>May be an accidental finding due to previous /recent / asymptomatic infection.</p> | <p>Consider whether the patient's pneumonia symptoms can be explained by viral infection, and whether antibiotic treatment is necessary / indicated.</p> |
| <p>Not detected<br/>(POC-PCR(FilmArray) is negative)</p>                                                                                                                                                                                                                                                                                                              | <p>A negative result does not rule out pneumonia, but means that CAP caused by the most common pathogens is less likely. Consider whether the pneumonia diagnosis is correct and consider investigation for rare causes of pneumonia (e.g. tuberculosis or <i>Chlamydia psittaci</i>).</p> |                                                                                                                                                                                                                  |                                                                                                                                                          |

#CAP: Community-Acquired Pneumonia

\*: Concentration (copies/mL) is reported in the POC-PCR (FilmArray) result

Most bacterial causative pathogens of CAP are also part of the normal respiratory microbiota or may colonize the upper respiratory tract, and the clinical relevance of these findings must always be assessed carefully.

For the bacterial agents marked with “\*”, a concentration (copies/mL) is reported in the POC-PCR (FilmArray) result. There is a reasonable correlation between copies/mL and the culture-based measure “CFU/mL”, however, “copies/mL” is typically a factor of 10-100 higher than the corresponding “CFU/mL”.

The limits of significance are not well established and depend probably on the agent, the quality of the sample and the clinical context - and must therefore be used with caution. The Infectious Diseases Society of America and the American Society of Microbiology<sup>1</sup> propose the following culture-based limits for hospital-acquired pneumonia:

| Culture-based measure                    | POC-PCR (FilmArray) concentration            | Interpretation (caution)            |
|------------------------------------------|----------------------------------------------|-------------------------------------|
| < 10 <sup>4</sup> CFU/mL                 | ≈ < 10 <sup>5</sup> copies/mL                | Indicates mixture with normal flora |
| 10 <sup>4</sup> – 10 <sup>5</sup> CFU/mL | ≈ 10 <sup>5</sup> -10 <sup>6</sup> copies/mL | Gray zone                           |
| > 10 <sup>5</sup> CFU/mL                 | ≈ >10 <sup>6</sup> copies/mL                 | Indicates real findings             |

Developed by microbiologist Flemming Rosenvinge, Department of Clinical Microbiology, Odense University Hospital in Odense, and microbiologist Claus Østergaard, Department of Clinical Microbiology, Hospital Lillebælt in Kolding, Denmark

Version 1.1 – February 7th 2021

<sup>1</sup> Miller, J. M., Binnicker, M. J., Campbell, S., et al. A Guide to Utilization of the Microbiology Laboratory for Diagnosis of Infectious Diseases: 2018 Update by the Infectious Diseases Society of America and the American Society for Microbiology. *Clinical Infectious Diseases*, 67(6), e1–e94. <https://doi.org/10.1093/cid/ciy381>

### Appendix VI - Template for expert panel reference standard

The template for the expert panel reference standard is illustrated in the table:

| Main question                                                                                                                                                                                                                                                                                                                                                                                                            | Sub-question                                                                                                                                                                                                                                                                                                                                                          |
|--------------------------------------------------------------------------------------------------------------------------------------------------------------------------------------------------------------------------------------------------------------------------------------------------------------------------------------------------------------------------------------------------------------------------|-----------------------------------------------------------------------------------------------------------------------------------------------------------------------------------------------------------------------------------------------------------------------------------------------------------------------------------------------------------------------|
| Does the patient has an infection?<br><input type="checkbox"/> Yes <input type="checkbox"/> No                                                                                                                                                                                                                                                                                                                           | If yes, what was the focus of infection?<br><input type="checkbox"/> Respiratory <input type="checkbox"/> Urinary tract <input type="checkbox"/> Other                                                                                                                                                                                                                |
|                                                                                                                                                                                                                                                                                                                                                                                                                          | If yes, was the focus of infection identified within 48 hours?<br><input type="checkbox"/> Yes <input type="checkbox"/> No                                                                                                                                                                                                                                            |
| <i>If focus is respiratory infection</i>                                                                                                                                                                                                                                                                                                                                                                                 |                                                                                                                                                                                                                                                                                                                                                                       |
| What type of respiratory infection was the patient primarily hospitalized with?<br><input type="checkbox"/> Covid-19 pneumonia<br><input type="checkbox"/> CAP<br><input type="checkbox"/> COPD – exacerbation<br><input type="checkbox"/> Aspiration pneumonia<br><input type="checkbox"/> Other – please specify (by using a list of ICD-10 diagnosis): _____                                                          |                                                                                                                                                                                                                                                                                                                                                                       |
| <i>If focus is urinary tract infection (UTI)</i>                                                                                                                                                                                                                                                                                                                                                                         |                                                                                                                                                                                                                                                                                                                                                                       |
| What type of UTI was the patient primarily hospitalized with?<br><input type="checkbox"/> UTI without systemic effects (cystitis)<br><input type="checkbox"/> UTI with systemic effects (pyelonephritis/urosepsis)                                                                                                                                                                                                       | If UTI with systemic effects, please specify<br><input type="checkbox"/> Pyelonephritis (local symptoms + fever + increased CRP)<br><input type="checkbox"/> Urosepsis (UTI + 2 qSOFA or relevant bacteremia)<br><input type="checkbox"/> Cannot be further specified<br><input type="checkbox"/> Other – please specify (by using a list of ICD-10 diagnosis): _____ |
| <i>If focus of infection is other than respiratory and urinary tract infection</i>                                                                                                                                                                                                                                                                                                                                       |                                                                                                                                                                                                                                                                                                                                                                       |
| What type of infection was the patient primarily hospitalized with?<br><input type="checkbox"/> Unknown focus<br><input type="checkbox"/> Erysipelas<br><input type="checkbox"/> Tonsillitis<br><input type="checkbox"/> Gastroenteritis<br><input type="checkbox"/> Endocarditis<br><input type="checkbox"/> Meningitis<br><input type="checkbox"/> Other – please specify (by using a list of ICD-10 diagnosis): _____ |                                                                                                                                                                                                                                                                                                                                                                       |
| <input type="checkbox"/> Soft tissue abscess<br><input type="checkbox"/> Cholecystitis<br><input type="checkbox"/> Diverticulitis<br><input type="checkbox"/> Pancreatitis<br><input type="checkbox"/> Appendicitis                                                                                                                                                                                                      |                                                                                                                                                                                                                                                                                                                                                                       |

## Appendix VII - Algorithm for antibiotic treatment

The algorithm specifies if the antibiotic treatment is targeted or non-targeted. Targeted treatment is defined as narrow spectrum antibiotics directed against CAP, antibiotics directed against a detected respiratory pathogen or no antibiotics (e.g. in the absence of a bacterial pathogen and/or presence of a viral pathogen). Non-targeted treatment is defined as broad spectrum antibiotics not directed against a specific pathogen or antibiotics not directed against CAP.

Narrow spectrum antibiotics (NS) is defined in table 1. Targeted treatment (TT) for the different types of agents is defined in table 2. Treatment with other antibiotics (not listed as NS or TT in table 1 and 2) is classified non-targeted treatment (NT).

Table 1 Narrow spectrum antibiotics

| Antibiotic treatment – narrow spectrum     |                                                                                      |
|--------------------------------------------|--------------------------------------------------------------------------------------|
| No penicillin allergy                      | Reported penicillin allergy                                                          |
| Benzylpenicillin<br>Phenoxyethylpenicillin | Benzylpenicillin<br>Phenoxyethylpenicillin<br>Clindamycin<br>Macrolide<br>Cefuroxime |

Table 2 Targeted treatment

| Agents                                                   | Antibiotic treatment - targeted                                                                                                                                     |                                                                                                                                                                     |
|----------------------------------------------------------|---------------------------------------------------------------------------------------------------------------------------------------------------------------------|---------------------------------------------------------------------------------------------------------------------------------------------------------------------|
|                                                          | No penicillin allergy                                                                                                                                               | Reported penicillin allergy                                                                                                                                         |
| <i>Streptococcus pneumoniae, pyogenes, or agalactiae</i> | Benzylpenicillin<br>Phenoxyethylpenicillin                                                                                                                          | Benzylpenicillin<br>Phenoxyethylpenicillin<br>Clindamycin<br>Macrolide<br>Cefuroxime                                                                                |
| <i>H. influenzae</i>                                     | Benzylpenicillin<br>Ampicillin<br>Piv-ampicillin<br>Amoxicillin<br>Amoxicillin-clavulanate<br>Piperacillin/Tazobactam<br>Cefuroxime<br>Doxycycline<br>Ciprofloxacin | Benzylpenicillin<br>Ampicillin<br>Piv-ampicillin<br>Amoxicillin<br>Amoxicillin-clavulanate<br>Piperacillin/Tazobactam<br>Cefuroxime<br>Doxycycline<br>Ciprofloxacin |
| <i>Moraxella catarrhalis</i>                             | Amoxicillin-clavulanate<br>Piperacillin/Tazobactam<br>Cefuroxime or<br>Macrolide                                                                                    | Amoxicillin-clavulanate<br>Piperacillin/ Tazobactam<br>Cefuroxime<br>Macrolide                                                                                      |
| <i>Staphylococcus aureus</i>                             | Cloxacillin                                                                                                                                                         | Benzylpenicillin                                                                                                                                                    |

|                                                                |                                                                           |                                                                                                                              |
|----------------------------------------------------------------|---------------------------------------------------------------------------|------------------------------------------------------------------------------------------------------------------------------|
|                                                                | Dicloxacillin                                                             | Phenoxymethyl-penicillin<br>Macrolid<br>Cefuroxime<br>Cloxacillin<br>Dicloxacillin<br>Clindamycin<br>Macrolide<br>Cefuroxime |
| <i>Legionella pneumophila</i>                                  | Macrolide<br>Ciprofloxacin<br>Moxifloxacin<br>Doxycycline<br>Tetracycline | Macrolide<br>Ciprofloxacin<br>Moxifloxacin<br>Doxycycline<br>Tetracycline                                                    |
| <i>Mycoplasma pneumoniae</i> or<br><i>Chlamydia pneumoniae</i> | Macrolide<br>Moxifloxacin<br>Doxycycline<br>Tetracycline                  | Macrolide<br>Moxifloxacin<br>Doxycycline<br>Tetracycline                                                                     |





STANDARD PROTOCOL ITEMS: RECOMMENDATIONS FOR INTERVENTIONAL TRIALS

## Completed SPIRIT checklist

| Section/item                      | ItemNo | Description                                                                                                                                                                                                                                                                              | Page in protocol |
|-----------------------------------|--------|------------------------------------------------------------------------------------------------------------------------------------------------------------------------------------------------------------------------------------------------------------------------------------------|------------------|
| <b>Administrative information</b> |        |                                                                                                                                                                                                                                                                                          |                  |
| Title                             | 1      | Descriptive title identifying the study design, population, interventions, and, if applicable, trial acronym                                                                                                                                                                             | 1                |
| Trial registration                | 2a     | Trial identifier and registry name. If not yet registered, name of intended registry                                                                                                                                                                                                     | 3                |
|                                   | 2b     | All items from the World Health Organization Trial Registration Data Set                                                                                                                                                                                                                 | 3                |
| Protocol version                  | 3      | Date and version identifier                                                                                                                                                                                                                                                              | 17               |
| Funding                           | 4      | Sources and types of financial, material, and other support                                                                                                                                                                                                                              | 17               |
| Roles and responsibilities        | 5a     | Names, affiliations, and roles of protocol contributors                                                                                                                                                                                                                                  | 17               |
|                                   | 5b     | Name and contact information for the trial sponsor                                                                                                                                                                                                                                       | 3+18             |
|                                   | 5c     | Role of study sponsor and funders, if any, in study design; collection, management, analysis, and interpretation of data; writing of the report; and the decision to submit the report for publication, including whether they will have ultimate authority over any of these activities | 18               |
|                                   | 5d     | Composition, roles, and responsibilities of the coordinating centre, steering committee, endpoint adjudication committee, data management team, and other individuals or groups overseeing the trial, if applicable (see Item 21a for data monitoring committee)                         | 18               |
| <b>Introduction</b>               |        |                                                                                                                                                                                                                                                                                          |                  |
| Background and rationale          | 6a     | Description of research question and justification for undertaking the trial, including summary of relevant studies (published and unpublished) examining benefits and harms for each intervention                                                                                       | 6-7              |
|                                   | 6b     | Explanation for choice of comparators                                                                                                                                                                                                                                                    | 6-7              |
| Objectives                        | 7      | Specific objectives or hypotheses                                                                                                                                                                                                                                                        | 7-8              |

|    |                                                           |     |                                                                                                                                                                                                                                                                                                                                                                                |                |
|----|-----------------------------------------------------------|-----|--------------------------------------------------------------------------------------------------------------------------------------------------------------------------------------------------------------------------------------------------------------------------------------------------------------------------------------------------------------------------------|----------------|
| 1  |                                                           |     |                                                                                                                                                                                                                                                                                                                                                                                |                |
| 2  | Trial design                                              | 8   | Description of trial design including type of trial (eg, parallel group, crossover, factorial, single group), allocation ratio, and framework (eg, superiority, equivalence, noninferiority, exploratory)                                                                                                                                                                      | 8              |
| 3  |                                                           |     |                                                                                                                                                                                                                                                                                                                                                                                |                |
| 4  |                                                           |     |                                                                                                                                                                                                                                                                                                                                                                                |                |
| 5  |                                                           |     |                                                                                                                                                                                                                                                                                                                                                                                |                |
| 6  |                                                           |     |                                                                                                                                                                                                                                                                                                                                                                                |                |
| 7  |                                                           |     |                                                                                                                                                                                                                                                                                                                                                                                |                |
| 8  | <b>Methods: Participants, interventions, and outcomes</b> |     |                                                                                                                                                                                                                                                                                                                                                                                |                |
| 9  |                                                           |     |                                                                                                                                                                                                                                                                                                                                                                                |                |
| 10 | Study setting                                             | 9   | Description of study settings (eg, community clinic, academic hospital) and list of countries where data will be collected. Reference to where list of study sites can be obtained                                                                                                                                                                                             | 8              |
| 11 |                                                           |     |                                                                                                                                                                                                                                                                                                                                                                                |                |
| 12 |                                                           |     |                                                                                                                                                                                                                                                                                                                                                                                |                |
| 13 |                                                           |     |                                                                                                                                                                                                                                                                                                                                                                                |                |
| 14 | Eligibility criteria                                      | 10  | Inclusion and exclusion criteria for participants. If applicable, eligibility criteria for study centres and individuals who will perform the interventions (eg, surgeons, psychotherapists)                                                                                                                                                                                   | 8-9            |
| 15 |                                                           |     |                                                                                                                                                                                                                                                                                                                                                                                |                |
| 16 |                                                           |     |                                                                                                                                                                                                                                                                                                                                                                                |                |
| 17 |                                                           |     |                                                                                                                                                                                                                                                                                                                                                                                |                |
| 18 |                                                           |     |                                                                                                                                                                                                                                                                                                                                                                                |                |
| 19 | Interventions                                             | 11a | Interventions for each group with sufficient detail to allow replication, including how and when they will be administered                                                                                                                                                                                                                                                     | 9-11           |
| 20 |                                                           |     |                                                                                                                                                                                                                                                                                                                                                                                |                |
| 21 |                                                           |     |                                                                                                                                                                                                                                                                                                                                                                                |                |
| 22 |                                                           | 11b | Criteria for discontinuing or modifying allocated interventions for a given trial participant (eg, drug dose change in response to harms, participant request, or improving/worsening disease)                                                                                                                                                                                 | 15             |
| 23 |                                                           |     |                                                                                                                                                                                                                                                                                                                                                                                |                |
| 24 |                                                           |     |                                                                                                                                                                                                                                                                                                                                                                                |                |
| 25 |                                                           |     |                                                                                                                                                                                                                                                                                                                                                                                |                |
| 26 |                                                           | 11c | Strategies to improve adherence to intervention protocols, and any procedures for monitoring adherence (eg, drug tablet return, laboratory tests)                                                                                                                                                                                                                              | 12             |
| 27 |                                                           |     |                                                                                                                                                                                                                                                                                                                                                                                |                |
| 28 |                                                           |     |                                                                                                                                                                                                                                                                                                                                                                                |                |
| 29 |                                                           |     |                                                                                                                                                                                                                                                                                                                                                                                |                |
| 30 |                                                           |     |                                                                                                                                                                                                                                                                                                                                                                                |                |
| 31 |                                                           | 11d | Relevant concomitant care and interventions that are permitted or prohibited during the trial                                                                                                                                                                                                                                                                                  | 7-8            |
| 32 |                                                           |     |                                                                                                                                                                                                                                                                                                                                                                                |                |
| 33 |                                                           |     |                                                                                                                                                                                                                                                                                                                                                                                |                |
| 34 | Outcomes                                                  | 12  | Primary, secondary, and other outcomes, including the specific measurement variable (eg, systolic blood pressure), analysis metric (eg, change from baseline, final value, time to event), method of aggregation (eg, median, proportion), and time point for each outcome. Explanation of the clinical relevance of chosen efficacy and harm outcomes is strongly recommended | 12-15          |
| 35 |                                                           |     |                                                                                                                                                                                                                                                                                                                                                                                |                |
| 36 |                                                           |     |                                                                                                                                                                                                                                                                                                                                                                                |                |
| 37 |                                                           |     |                                                                                                                                                                                                                                                                                                                                                                                |                |
| 38 |                                                           |     |                                                                                                                                                                                                                                                                                                                                                                                |                |
| 39 |                                                           |     |                                                                                                                                                                                                                                                                                                                                                                                |                |
| 40 |                                                           |     |                                                                                                                                                                                                                                                                                                                                                                                |                |
| 41 |                                                           |     |                                                                                                                                                                                                                                                                                                                                                                                |                |
| 42 | Participant timeline                                      | 13  | Time schedule of enrolment, interventions (including any run-ins and washouts), assessments, and visits for participants. A schematic diagram is highly recommended (see Figure)                                                                                                                                                                                               | 9+appendix III |
| 43 |                                                           |     |                                                                                                                                                                                                                                                                                                                                                                                |                |
| 44 |                                                           |     |                                                                                                                                                                                                                                                                                                                                                                                |                |
| 45 |                                                           |     |                                                                                                                                                                                                                                                                                                                                                                                |                |
| 46 |                                                           |     |                                                                                                                                                                                                                                                                                                                                                                                |                |
| 47 | Sample size                                               | 14  | Estimated number of participants needed to achieve study objectives and how it was determined, including clinical and statistical assumptions supporting any sample size calculations                                                                                                                                                                                          | 12-15          |
| 48 |                                                           |     |                                                                                                                                                                                                                                                                                                                                                                                |                |
| 49 |                                                           |     |                                                                                                                                                                                                                                                                                                                                                                                |                |
| 50 |                                                           |     |                                                                                                                                                                                                                                                                                                                                                                                |                |
| 51 | Recruitment                                               | 15  | Strategies for achieving adequate participant enrolment to reach target sample size                                                                                                                                                                                                                                                                                            | 12             |
| 52 |                                                           |     |                                                                                                                                                                                                                                                                                                                                                                                |                |
| 53 |                                                           |     |                                                                                                                                                                                                                                                                                                                                                                                |                |

#### Methods: Assignment of interventions (for controlled trials)

Allocation:

|    |                                                           |     |                                                                          |       |
|----|-----------------------------------------------------------|-----|--------------------------------------------------------------------------|-------|
| 1  |                                                           |     |                                                                          |       |
| 2  | Sequence                                                  | 16a | Method of generating the allocation sequence (eg, computer-              |       |
| 3  | generation                                                |     | generated random numbers), and list of any factors for stratification.   |       |
| 4  |                                                           |     | To reduce predictability of a random sequence, details of any planned    | 10    |
| 5  |                                                           |     | restriction (eg, blocking) should be provided in a separate document     |       |
| 6  |                                                           |     | that is unavailable to those who enrol participants or assign            |       |
| 7  |                                                           |     | interventions                                                            |       |
| 8  |                                                           |     |                                                                          |       |
| 9  |                                                           |     |                                                                          |       |
| 10 | Allocation                                                | 16b | Mechanism of implementing the allocation sequence (eg, central           |       |
| 11 | concealme                                                 |     | telephone; sequentially numbered, opaque, sealed envelopes),             | 10    |
| 12 | nt                                                        |     | describing any steps to conceal the sequence until interventions are     |       |
| 13 | mechanism                                                 |     | assigned                                                                 |       |
| 14 |                                                           |     |                                                                          |       |
| 15 | Implementa                                                | 16c | Who will generate the allocation sequence, who will enrol participants,  | 10    |
| 16 | tion                                                      |     | and who will assign participants to interventions                        |       |
| 17 |                                                           |     |                                                                          |       |
| 18 |                                                           |     |                                                                          |       |
| 19 | Blinding                                                  | 17a | Who will be blinded after assignment to interventions (eg, trial         | 10    |
| 20 | (masking)                                                 |     | participants, care providers, outcome assessors, data analysts), and     |       |
| 21 |                                                           |     | how                                                                      |       |
| 22 |                                                           |     |                                                                          |       |
| 23 |                                                           | 17b | If blinded, circumstances under which unblinding is permissible, and     | -     |
| 24 |                                                           |     | procedure for revealing a participant's allocated intervention during    |       |
| 25 |                                                           |     | the trial                                                                |       |
| 26 |                                                           |     |                                                                          |       |
| 27 |                                                           |     |                                                                          |       |
| 28 | <b>Methods: Data collection, management, and analysis</b> |     |                                                                          |       |
| 29 |                                                           |     |                                                                          |       |
| 30 | Data collection                                           | 18a | Plans for assessment and collection of outcome, baseline, and other      |       |
| 31 | methods                                                   |     | trial data, including any related processes to promote data quality (eg, | 12-15 |
| 32 |                                                           |     | duplicate measurements, training of assessors) and a description of      |       |
| 33 |                                                           |     | study instruments (eg, questionnaires, laboratory tests) along with      |       |
| 34 |                                                           |     | their reliability and validity, if known. Reference to where data        |       |
| 35 |                                                           |     | collection forms can be found, if not in the protocol                    |       |
| 36 |                                                           |     |                                                                          |       |
| 37 |                                                           |     |                                                                          |       |
| 38 |                                                           | 18b | Plans to promote participant retention and complete follow-up,           | -     |
| 39 |                                                           |     | including list of any outcome data to be collected for participants who  |       |
| 40 |                                                           |     | discontinue or deviate from intervention protocols                       |       |
| 41 |                                                           |     |                                                                          |       |
| 42 | Data                                                      | 19  | Plans for data entry, coding, security, and storage, including any       |       |
| 43 | management                                                |     | related processes to promote data quality (eg, double data entry;        | 12-15 |
| 44 |                                                           |     | range checks for data values). Reference to where details of data        |       |
| 45 |                                                           |     | management procedures can be found, if not in the protocol               |       |
| 46 |                                                           |     |                                                                          |       |
| 47 |                                                           |     |                                                                          |       |
| 48 | Statistical                                               | 20a | Statistical methods for analysing primary and secondary outcomes.        | 12-15 |
| 49 | methods                                                   |     | Reference to where other details of the statistical analysis plan can be |       |
| 50 |                                                           |     | found, if not in the protocol                                            |       |
| 51 |                                                           |     |                                                                          |       |
| 52 |                                                           | 20b | Methods for any additional analyses (eg, subgroup and adjusted           | 12-15 |
| 53 |                                                           |     | analyses)                                                                |       |
| 54 |                                                           |     |                                                                          |       |
| 55 |                                                           | 20c | Definition of analysis population relating to protocol non-adherence     |       |
| 56 |                                                           |     | (eg, as randomised analysis), and any statistical methods to handle      | 12-15 |
| 57 |                                                           |     | missing data (eg, multiple imputation)                                   |       |
| 58 |                                                           |     |                                                                          |       |
| 59 |                                                           |     |                                                                          |       |
| 60 |                                                           |     |                                                                          |       |

**Methods: Monitoring**

|    |                                 |     |                                                                                                                                                                                                                                                                                                                                       |       |
|----|---------------------------------|-----|---------------------------------------------------------------------------------------------------------------------------------------------------------------------------------------------------------------------------------------------------------------------------------------------------------------------------------------|-------|
| 1  |                                 |     |                                                                                                                                                                                                                                                                                                                                       |       |
| 2  |                                 |     |                                                                                                                                                                                                                                                                                                                                       |       |
| 3  |                                 |     |                                                                                                                                                                                                                                                                                                                                       |       |
| 4  | Data                            | 21a | Composition of data monitoring committee (DMC); summary of its role and reporting structure; statement of whether it is independent from the sponsor and competing interests; and reference to where further details about its charter can be found, if not in the protocol. Alternatively, an explanation of why a DMC is not needed | 11-12 |
| 5  | monitoring                      |     |                                                                                                                                                                                                                                                                                                                                       |       |
| 6  |                                 |     |                                                                                                                                                                                                                                                                                                                                       |       |
| 7  |                                 |     |                                                                                                                                                                                                                                                                                                                                       |       |
| 8  |                                 |     |                                                                                                                                                                                                                                                                                                                                       |       |
| 9  |                                 |     |                                                                                                                                                                                                                                                                                                                                       |       |
| 10 |                                 | 21b | Description of any interim analyses and stopping guidelines, including who will have access to these interim results and make the final decision to terminate the trial                                                                                                                                                               | 15    |
| 11 |                                 |     |                                                                                                                                                                                                                                                                                                                                       |       |
| 12 |                                 |     |                                                                                                                                                                                                                                                                                                                                       |       |
| 13 |                                 |     |                                                                                                                                                                                                                                                                                                                                       |       |
| 14 |                                 |     |                                                                                                                                                                                                                                                                                                                                       |       |
| 15 | Harms                           | 22  | Plans for collecting, assessing, reporting, and managing solicited and spontaneously reported adverse events and other unintended effects of trial interventions or trial conduct                                                                                                                                                     | 12    |
| 16 |                                 |     |                                                                                                                                                                                                                                                                                                                                       |       |
| 17 |                                 |     |                                                                                                                                                                                                                                                                                                                                       |       |
| 18 |                                 |     |                                                                                                                                                                                                                                                                                                                                       |       |
| 19 | Auditing                        | 23  | Frequency and procedures for auditing trial conduct, if any, and whether the process will be independent from investigators and the sponsor                                                                                                                                                                                           | 12    |
| 20 |                                 |     |                                                                                                                                                                                                                                                                                                                                       |       |
| 21 |                                 |     |                                                                                                                                                                                                                                                                                                                                       |       |
| 22 |                                 |     |                                                                                                                                                                                                                                                                                                                                       |       |
| 23 |                                 |     |                                                                                                                                                                                                                                                                                                                                       |       |
| 24 |                                 |     |                                                                                                                                                                                                                                                                                                                                       |       |
| 25 | <b>Ethics and dissemination</b> |     |                                                                                                                                                                                                                                                                                                                                       |       |
| 26 | Research                        | 24  | Plans for seeking research ethics committee/institutional review board (REC/IRB) approval                                                                                                                                                                                                                                             | 15-16 |
| 27 | ethics                          |     |                                                                                                                                                                                                                                                                                                                                       |       |
| 28 | approval                        |     |                                                                                                                                                                                                                                                                                                                                       |       |
| 29 |                                 |     |                                                                                                                                                                                                                                                                                                                                       |       |
| 30 | Protocol                        | 25  | Plans for communicating important protocol modifications (eg, changes to eligibility criteria, outcomes, analyses) to relevant parties (eg, investigators, REC/IRBs, trial participants, trial registries, journals, regulators)                                                                                                      | 16    |
| 31 | amendments                      |     |                                                                                                                                                                                                                                                                                                                                       |       |
| 32 |                                 |     |                                                                                                                                                                                                                                                                                                                                       |       |
| 33 |                                 |     |                                                                                                                                                                                                                                                                                                                                       |       |
| 34 |                                 |     |                                                                                                                                                                                                                                                                                                                                       |       |
| 35 |                                 |     |                                                                                                                                                                                                                                                                                                                                       |       |
| 36 | Consent or                      | 26a | Who will obtain informed consent or assent from potential trial participants or authorised surrogates, and how (see Item 32)                                                                                                                                                                                                          | 9     |
| 37 | assent                          |     |                                                                                                                                                                                                                                                                                                                                       |       |
| 38 |                                 |     |                                                                                                                                                                                                                                                                                                                                       |       |
| 39 |                                 | 26b | Additional consent provisions for collection and use of participant data and biological specimens in ancillary studies, if applicable                                                                                                                                                                                                 | -     |
| 40 |                                 |     |                                                                                                                                                                                                                                                                                                                                       |       |
| 41 |                                 |     |                                                                                                                                                                                                                                                                                                                                       |       |
| 42 |                                 |     |                                                                                                                                                                                                                                                                                                                                       |       |
| 43 | Confidentiality                 | 27  | How personal information about potential and enrolled participants will be collected, shared, and maintained in order to protect confidentiality before, during, and after the trial                                                                                                                                                  | 15-16 |
| 44 |                                 |     |                                                                                                                                                                                                                                                                                                                                       |       |
| 45 |                                 |     |                                                                                                                                                                                                                                                                                                                                       |       |
| 46 |                                 |     |                                                                                                                                                                                                                                                                                                                                       |       |
| 47 | Declaration of                  | 28  | Financial and other competing interests for principal investigators for the overall trial and each study site                                                                                                                                                                                                                         | 17    |
| 48 | interests                       |     |                                                                                                                                                                                                                                                                                                                                       |       |
| 49 |                                 |     |                                                                                                                                                                                                                                                                                                                                       |       |
| 50 | Access to data                  | 29  | Statement of who will have access to the final trial dataset, and disclosure of contractual agreements that limit such access for investigators                                                                                                                                                                                       | 16    |
| 51 |                                 |     |                                                                                                                                                                                                                                                                                                                                       |       |
| 52 |                                 |     |                                                                                                                                                                                                                                                                                                                                       |       |
| 53 |                                 |     |                                                                                                                                                                                                                                                                                                                                       |       |
| 54 |                                 |     |                                                                                                                                                                                                                                                                                                                                       |       |
| 55 | Ancillary and                   | 30  | Provisions, if any, for ancillary and post-trial care, and for compensation to those who suffer harm from trial participation                                                                                                                                                                                                         | -     |
| 56 | post-trial care                 |     |                                                                                                                                                                                                                                                                                                                                       |       |
| 57 |                                 |     |                                                                                                                                                                                                                                                                                                                                       |       |
| 58 |                                 |     |                                                                                                                                                                                                                                                                                                                                       |       |
| 59 |                                 |     |                                                                                                                                                                                                                                                                                                                                       |       |
| 60 |                                 |     |                                                                                                                                                                                                                                                                                                                                       |       |

|    |                   |     |                                                                              |        |
|----|-------------------|-----|------------------------------------------------------------------------------|--------|
| 1  |                   |     |                                                                              |        |
| 2  | Dissemination     | 31a | Plans for investigators and sponsor to communicate trial results to          |        |
| 3  | policy            |     | participants, healthcare professionals, the public, and other relevant       | 16     |
| 4  |                   |     | groups (eg, via publication, reporting in results databases, or other        |        |
| 5  |                   |     | data sharing arrangements), including any publication restrictions           |        |
| 6  |                   |     |                                                                              |        |
| 7  |                   | 31b | Authorship eligibility guidelines and any intended use of professional       | 16     |
| 8  |                   |     | writers                                                                      |        |
| 9  |                   |     |                                                                              |        |
| 10 |                   | 31c | Plans, if any, for granting public access to the full protocol, participant- | 16     |
| 11 |                   |     | level dataset, and statistical code                                          |        |
| 12 |                   |     |                                                                              |        |
| 13 |                   |     |                                                                              |        |
| 14 | <b>Appendices</b> |     |                                                                              |        |
| 15 |                   |     |                                                                              |        |
| 16 | Informed          | 32  | Model consent form and other related documentation given to                  | Appen  |
| 17 | consent           |     | participants and authorised surrogates                                       | dix I  |
| 18 | materials         |     |                                                                              |        |
| 19 |                   |     |                                                                              |        |
| 20 | Biological        | 33  | Plans for collection, laboratory evaluation, and storage of biological       | Appen  |
| 21 | specimens         |     | specimens for genetic or molecular analysis in the current trial and for     | dix II |
| 22 |                   |     | future use in ancillary studies, if applicable                               |        |
| 23 |                   |     |                                                                              |        |
| 24 |                   |     |                                                                              |        |
| 25 |                   |     |                                                                              |        |
| 26 |                   |     |                                                                              |        |
| 27 |                   |     |                                                                              |        |
| 28 |                   |     |                                                                              |        |
| 29 |                   |     |                                                                              |        |
| 30 |                   |     |                                                                              |        |
| 31 |                   |     |                                                                              |        |
| 32 |                   |     |                                                                              |        |
| 33 |                   |     |                                                                              |        |
| 34 |                   |     |                                                                              |        |
| 35 |                   |     |                                                                              |        |
| 36 |                   |     |                                                                              |        |
| 37 |                   |     |                                                                              |        |
| 38 |                   |     |                                                                              |        |
| 39 |                   |     |                                                                              |        |
| 40 |                   |     |                                                                              |        |
| 41 |                   |     |                                                                              |        |
| 42 |                   |     |                                                                              |        |
| 43 |                   |     |                                                                              |        |
| 44 |                   |     |                                                                              |        |
| 45 |                   |     |                                                                              |        |
| 46 |                   |     |                                                                              |        |
| 47 |                   |     |                                                                              |        |
| 48 |                   |     |                                                                              |        |
| 49 |                   |     |                                                                              |        |
| 50 |                   |     |                                                                              |        |
| 51 |                   |     |                                                                              |        |
| 52 |                   |     |                                                                              |        |
| 53 |                   |     |                                                                              |        |
| 54 |                   |     |                                                                              |        |
| 55 |                   |     |                                                                              |        |
| 56 |                   |     |                                                                              |        |
| 57 |                   |     |                                                                              |        |
| 58 |                   |     |                                                                              |        |
| 59 |                   |     |                                                                              |        |
| 60 |                   |     |                                                                              |        |
