# Supplementary material for: Improved diagnostics of infectious diseases in emergency departments: a protocol of a multifaceted multicentre diagnostic study
Source: HighWire-hosted journal article supplement (doi:10.1136/bmjopen-2021-049606), 2021-09-01
Supplement: bmjopen-2021-049606supp001_data_supplement.pdf [file bmjopen-2021-049606supp001_data_supplement.pdf]

## Appendix

- I. Informed consent materials
- II. Biological specimens
- III. Schedule of enrollment, interventions, and assessments
- IV. Targets in POC-PCR
- V. Recommended action list
- VI. Template for reference standard
- VII. Algorithm for antibiotic prescription

## Appendix I - Informed consent materials

Informed consent materials given to the participants has been developed in three versions – track A, B, and C, respectively. The written consent form can be found at the end of appendix I. It is all in Danish.

---

### Participant information - Track A

**Deltagerinformation om deltagelse i videnskabeligt forskningsprojekt for personer, der indlægges akut med mistanke om lungebetændelse**

## Forbedret diagnostik af akutte infektioner

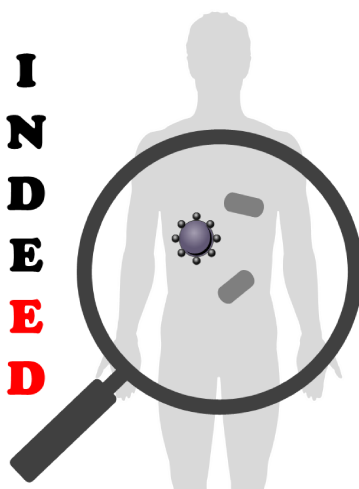

**Infectious Diagnostics in Emergency Departments (INDEED study)**

**Et samarbejdsprojekt på tværs af specialer på Sygehus Sønderjylland, Sygehus Lillebælt og Odense Universitetshospital med udgangspunkt i Akutafdelingerne**

VEK.nr. 76527

18.12.2020

INDEED-projekt – del A version 1.2

*Vi vil spørge, om du vil deltage i et videnskabeligt projekt?*

*Projektet handler om at blive bedre til at diagnosticere lungebetændelse på Akutafdelingen, så en målrettet behandling kan igangsættes så hurtigt som muligt.*

*Før du beslutter, om du vil deltage i projektet, skal du fuldt ud forstå, hvad projektet går ud på, og hvorfor vi gennemfører det. Vi vil derfor bede dig om at læse denne deltagerinformation grundigt.*

*Hvis du beslutter dig for at deltage, vil vi bede dig om at underskrive en samtykkeerklæring. Husk, at du har ret til at rådføre dig hos familie, venner eller bekendte. Du har også ret til betænkningstid før du underskriver, men da der er tale om en akut infektion, som kræver hurtig behandling, beder vi om, at du beslutter dig inden for 30 minutter.*

*Det er frivilligt at deltage i projektet. Du kan når som helst og uden at give en grund trække dit samtykke tilbage. Hvis du trækker dit samtykke om deltagelse i projektet tilbage, vil det ikke få konsekvenser for din videre behandling.*

## Projektets mål

De redskaber og undersøgelser, der eksisterer i dag til at diagnosticere lungebetændelse, har mange begrænsninger. Det udfordrer lægen i at stille en sikker diagnose inden for kort tid og igangsætte en målrettet behandling. Det kan få konsekvenser for den enkelte persons indlæggelsesforløb. Hvis man behandler med antibiotika som dækker flere bakterier end nødvendigt vil det også bidrage til udviklingen af bakterier, som er modstandsdygtige over for mange antibiotika.

Projektet har derfor til formål at finde bedre redskaber, som kan hjælpe lægen til at stille en sikker diagnose inden for få timer for personer, indlagt akut med mistanke om lungebetændelse.

## Det undersøger projektet

Projektet vil undersøge

- hvilke symptomer, tegn og forhold, der kendetegner lungebetændelse og sygdomsgraden
- hvilke markører for infektion i blodet, der bedst kan identificere en lungebetændelse og sygdomsgraden
- om en ny metode til at måle bakterier i urinen er nyttig
- om en ny metode til at identificere bakterier i sekret fra lungerne er nyttigt
- om ultralydsundersøgelse og CT-skanning med meget lav strålingsrisiko kan bruges til at diagnosticere lungebetændelse

## Plan for projektet

Projektet foregår på Fælles Akutmodtagelsen i Aabenraa, Sygehus Sønderjylland, på Akutafdelingen i Kolding, Sygehus Lillebælt, og på Fælle Akut Modtagelsen i Odense, Odense Universitetshospital. Fra

VEK.nr. 76527

18.12.2020

INDEED-projekt – del A version 1.2

februar 2021 til vinteren 2021/22 vil 500 voksne personer, som indlægges akut med mistanke om lungebetændelse på de tre akutafdelinger, blive inviteret til at deltage.

Personalet vil i forbindelse med din indlæggelse opsøge og informere dig om projektet, og tilbyde deltagelse i projektet. Da det er vigtigt at en akut infektion bliver behandlet hurtigt, vil vi bede dig om at tilkendegive din beslutning inden for en halv time.

### Det indebærer deltagelse i projektet for dig

Deltagelse i projektet betyder, at du vil modtage den normale behandling, afdelingen tilbyder, og derudover få foretaget ekstra undersøgelser.

Vi vil stille dig nogle spørgsmål omkring dine symptomer, tidligere og aktuelle sygdomme, og hvordan du har det. Vi beder i den forbindelse adgang til din patientjournal, for at følge op på eventuelle tidligere indlæggelser, den aktuelle indlæggelse, og eventuelle indlæggelser inden for den næste måned efter du er udskrivet.

Vi vil tage 14mL ekstra blod svarende til 2 ekstra rør, når du alligevel får taget blodprøve, og hjælpe dig med at aflevere en urinprøve.

Af det sekret fra lungerne, som der bliver taget ifølge normal behandling, vil vi tage en lille del fra nogle af projektpersonerne, og undersøge det med en ny metode.

Det blod, urin og sekret fra lungerne, der indhentes til projektet, vil blive destrueret, når projektet er afsluttet.

Hvis du vælger at deltage, skal du have taget to ekstra skanninger af lungerne. 1) Ultralydsskanning som foretages på akutafdelingen og tager 5 min. 2) En CT-skanning som består af en skanning med meget lav strålingsrisiko, og en højopløselig CT-skanning, som er den mest præcise skanning, der benyttes på lungerne i dag. CT-skanningen vil i alt tage 10 min.

Dit samtykke vil give den forsøgsansvarlige, sponsor og dennes repræsentant direkte adgang til relevante helbredsoplysninger i journalen for at kunne gennemføre, overvåge og kontrollere projektet. I projektet vil behandlingen af personoplysninger følge databeskyttelsesloven og databeskyttelsesforordningen. Efter indsamling af de ønskede informationer vil dine persondata blive fjernet fra vores registreringssystem, og dit personnummer vil blive erstattet af en kode (pseudo-anonymisering).

### Bivirkninger, risici, komplikationer og ulemper

Der er ingen eller kun få kendte risici eller bivirkninger ved at deltage i projektet. Alle prøvetagningsmetoder er velkendte og almindeligt anvendte procedurer, som vi har stor erfaring med og kendskab til. Der kan dog være risici ved undersøgelserne, som vi endnu ikke kender. Vi beder dig derfor om at fortælle, hvis du oplever problemer i forbindelse med prøvetagning og undersøgelser. Hvis vi opdager bivirkninger, som vi ikke allerede har fortalt dig om, vil du naturligvis blive orienteret med det samme, og du vil skulle tage stilling til, om du ønsker at fortsætte med prøvetagning og undersøgelser.

VEK.nr. 76527

18.12.2020

INDEED-projekt – del A version 1.2

De ekstra blodprøver til projektet tages i forbindelse med de blodprøver, der alligevel tages ved indlæggelse. Risici og bivirkninger ved at få taget en blodprøve kan være ubehageligt, lette smerter og/eller blå mærker, og i nogle tilfælde besvimelse. I sjældne tilfælde kan der opstå en mindre blodansamling eller betændelse ved indstiksstedet.

Urinprøven kan som regel afleveres i et bæger, opsamlet ved toiletbesøg. Er du kateterbærer eller på grund af sygdom ikke selv kan lade vandet, kan det blive nødvendigt at hjælpe vandladningen på vej med et kateter, som er et tyndt plastkrør til indførsel i blæren via urinrøret. Denne procedure kan give let ubehag og eventuelt kortvarig mindre blødning fra slimhinderne.

Skanningerne er ikke forbundet med smerte, men du kan eventuelt opleve ubehag ved flytningen til CT-skanneren. Væsentligste risiko i forbindelse med deltagelse i projektet er den ekstra stråledosis som CT-skanningen medfører. Den ekstra stråledosis, du udsættes for, udgør i alt lidt mindre end den baggrundsstråling, som du normalt udsættes for i løbet af et år. Strålingen fra skanningen medfører en let øget risiko for udvikling kræft på ca. 0,01-0,1% og svarer til, at den samlede livstidsrisiko for kræft stiger fra 25% til 25,1%. Denne risiko vurderes dog betydningsløs i forhold til de risici, der i øvrigt er ved din aktuelle indlæggelse.

### Dine prøvesvar

Ønsker du svar på de almindelige blod- og urinundersøgelser, kan du se det på [www.sundhed.dk](http://www.sundhed.dk). Svar på de ekstra blod- og urinundersøgelser i projektet vil ikke fremkomme her, da vi ikke kender betydningen af resultaterne endnu. Har svarene et alarmerende resultat, vil den behandlende læge få besked og vil vurdere, om det har betydning for din behandling. Resultatet af den ekstra undersøgelse af sekret fra lungerne, som der vil kunne blive lavet i projektet, vil lægen, der behandler dig, blive orienteret om.

Skanningsresultaterne vil være synlige for lægerne, der behandler dig, og indgå i deres vurdering og behandling. Hvis vi skulle opdage noget, der kunne give os mistanke om andre sygdomme (f.eks. kræft), vil vi via din læge kontakte dig og tilbyde yderligere udredning. Bidrager skanningerne ikke med viden, der ændrer på din behandling eller diagnose, hører du ikke nærmere til skanningsresultatet.

### Nytte ved projektet

Projektet er vigtigt for at vi fremadrettet kan gøre indlæggelsesforløbet for personer, der indlægges akut med mistanke om lungebetændelse, bedre. Projektet vil have en afgørende betydning for praksis på akutafdelingerne, og formentlig hvilken type antibiotika lægen ordinerer. Et mere målrettet antibiotikaforbrug vil bidrage til reduktion af bakterier, der er modstandsdygtige over for antibiotika, og dermed sikre at infektioner i fremtiden også kan behandles med antibiotika.

For dig personligt, vil deltagelse ikke umiddelbart have en betydning for dit behandlingsforløb. Hvis der skulle ske at være nogle særlige komplikationer til din aktuelle sygdom relateret til lungerne, vil vi dog med de ekstra scanninger formentlig hurtigere erkende dette.

### Udelukkelse fra undersøgelse

Du vil udgå af dele af projektet, hvis nogle af undersøgelse mislykkes af fx tekniske grunde eller hvis din behandlende læge vurderer, at det er for risikabelt for dig at deltage.

VEK.nr. 76527

18.12.2020

INDEED-projekt – del A version 1.2

## Adgang til projektets resultater

Projektets samlede resultater vil blive offentliggjort 2024 i videnskabelige tidsskrifter samt på sygehusenes hjemmesider. Resultater med relevans for beslutningstagere i sundhedsvæsenet vil blive offentliggjort i danske medier og tidsskrifter. Det sikres, at ingen deltagere kan genkendes i det, som offentliggøres. Har du interesse i at vide mere om projektets resultater, kan du efter offentliggørelse opsøge dem via <http://www.sygehussonderjylland.dk/wm521282>.

*Vi håber, at du med denne information har fået tilstrækkeligt indblik i, hvad det vil sige at deltage i projektet, og at du føler dig rustet til at tage beslutningen om din eventuelle deltagelse. Hvis du vil vide mere, er du meget velkommen til at kontakte os. Information om dine rettigheder er vedlagt denne deltagerinformation sidst i dokumentet (Bilag 1).*

*Hvis du beslutter dig for at deltage i projektet, vil vi bede dig om at underskrive samtykkeerklæringen. Du kan vælge om du vil give samtykke til hele projektet eller kun dele af projektet. Det er frivilligt at deltage i projektet, og du kan når som helst og uden at give en grund trække dit samtykke tilbage. Det vil ikke få konsekvenser for den videre behandling.*

*Yderligere oplysninger kan fås ved henvendelse til*

Professor og overlæge Christian Backer Mogensen  
Fælles Akutmodtagelsen, Sygehus Sønderjylland  
Kresten Philipsens Vej 15 - 6200 Aabenraa  
[Christian.Backer.Mogensen@rsyd.dk](mailto:Christian.Backer.Mogensen@rsyd.dk)  
Tlf: 79971123

### **Initiativtagere til projektet**

*Projektet er primært udarbejdet i samarbejde mellem Akutafdeling, Biokemisk Afdeling og Mikrobiologisk Afdeling, og Radiologisk Afdeling på Sygehus Sønderjylland, Sygehus Lillebælt og Odense Universitets Hospital. Projektet er forankret på Sygehus Sønderjylland og Institut for Regional Sundhedsforskning på Syddansk Universitet, som er ansøgnings- og bevillingsansvarlige.*

### **Økonomisk støtte til projektet**

*Projektet har fået økonomisk støttet i form af ph.d. stipendiat fra Syddansk Universitet (1.650.000kr), ph.d.-stipendiat fra Sygehus Sønderjylland (4.800.000kr) samt støtte til drift fra Region Syddanmark (500.000kr). Forsøgsansvarlige har ingen økonomisk tilknytning til støttegivere eller andre interessenter i forsøget. Der vil ikke være en økonomisk kompensation til patienter, der deltager i projektet.*

VEK.nr. 76527

18.12.2020

INDEED-projekt – del A version 1.2

## Participant information - Track B

**Deltagerinformation om deltagelse i videnskabeligt forskningsprojekt for personer, der indlægges akut med mistanke om nyrebækkenbetændelse**

## **Forbedret diagnostik af akutte infektioner**

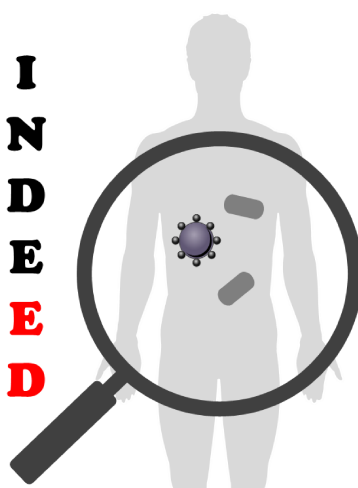

**Infectious Diagnostics in Emergency Departments (INDEED study)**

**Et samarbejdsprojekt på tværs af specialer på Sygehus Sønderjylland, Sygehus Lillebælt og Odense  
Universitetshospital med udgangspunkt i Akutafdelingerne**

VEK.nr. 76527

18.12.2020

INDEED-projekt – del A version 1.2

*Vi vil spørge, om du vil deltage i et videnskabeligt projekt?*

*Projektet handler om at blive bedre til at diagnosticere akut nyrebækkenbetændelse på Akutafdelingen, så en målrettet behandling kan igangsættes så hurtigt som muligt.*

*Før du beslutter, om du vil deltage i projektet, skal du fuldt ud forstå, hvad projektet går ud på, og hvorfor vi gennemfører det. Vi vil derfor bede dig om at læse denne deltagerinformation grundigt.*

*Hvis du beslutter dig for at deltage, vil vi bede dig om at underskrive en samtykkeerklæring. Husk, at du har ret til at rådføre dig hos familie, venner eller bekendte. Du har også ret til betænkningstid før du underskriver, men da der er tale om en akut infektion, som kræver hurtig behandling, beder vi om, at du beslutter dig inden for 30 minutter.*

*Det er frivilligt at deltage i projektet. Du kan når som helst og uden at give en grund trække dit samtykke tilbage. Hvis du trækker dit samtykke om deltagelse i projektet tilbage, vil det ikke få konsekvenser for din videre behandling.*

## Projektets mål

De redskaber og undersøgelser, der eksisterer i dag til at diagnosticere nyrebækkenbetændelse, har mange begrænsninger. Det udfordrer lægen i at stille en sikker diagnose inden for kort tid og igangsætte en målrettet behandling. Det kan få konsekvenser for den enkelte persons indlæggelsesforløb. Hvis man behandler med antibiotika som dækker flere bakterier end nødvendigt vil det også bidrage til udviklingen af bakterier, som er modstandsdygtige over for mange antibiotika.

Projektet har derfor til formål at finde bedre redskaber, som kan hjælpe lægen til at stille en sikker diagnose inden for få timer for personer, indlagt akut med mistanke om akut nyrebækkenbetændelse.

## Det undersøger projektet

Projektet vil undersøge

- hvilke symptomer, tegn og forhold, der kendetegner nyrebækkenbetændelse og sygdomsgraden
- hvilke markører for infektion i blodet, der bedst kan identificere en nyrebækkenbetændelse og sygdomsgraden
- om en ny metode til at måle bakterier i urinen er nyttig
- om ultralydsundersøgelse med og uden kontrastvæske kan bidrage til at diagnosticere nyrebækkenbetændelse

## Plan for projektet

Projektet foregår på Fælles Akutmodtagelsen i Aabenraa, Sygehus Sønderjylland, på Akutafdelingen i Kolding, Sygehus Lillebælt, og på Fælle Akut Modtagelsen i Odense, Odense Universitetshospital. Fra februar 2021 til vinteren 2021/22 vil 300 voksne personer, som indlægges akut med mistanke om nyrebækkenbetændelse på de tre akutafdelinger, blive inviteret til at deltage.



VEK.nr. 76527

18.12.2020

INDEED-projekt – del A version 1.2

Personalet vil i forbindelse med din indlæggelse opsøge og informere dig om projektet, og tilbyde deltagelse i projektet. Da det er vigtigt at en akut infektion bliver behandlet hurtigt, vil vi bede dig om at tilkænde give din beslutning inden for en halv time.

### Det indebærer deltagelse i projektet for dig

Deltagelse i projektet betyder, at du vil modtage den normale behandling, afdelingen tilbyder, og derudover få foretaget ekstra undersøgelser.

Vi vil stille dig nogle spørgsmål omkring dine symptomer, tidligere og aktuelle sygdomme, og hvordan du har det. Vi beder i den forbindelse adgang til din patientjournal, for at følge op på eventuelle tidligere indlæggelser, den aktuelle indlæggelse, og eventuelle indlæggelser inden for den næste måned efter du er udskrevet.

Vi vil tage 14mL ekstra blod svarende til 2 ekstra rør, når du alligevel får taget blodprøve, og hjælpe dig med at aflevere en urinprøve.

Det blod og urin, der indhentes til projektet, vil blive destrueret, når projektet er afsluttet.

Vi vil tilbyde dig tre ekstra skanninger af nyrerne. 1) Ultralydsskanning som foretages på akutafdelingen og tager 5 min. 2) Ultralydsskanning, hvor der sprøjtes kontrastvæske ind i dine blodårer, og som foretages af en røntgenlæge. Skanningen tager 20 min. 3) MR-skanning af røntgenlægen, og som tager 45 min. Det tilstræbes, at skanningerne foretages i forbindelse med din indlæggelse. Hvis du udskrives før, kan det være nødvendigt, at du møder op til skanningerne dagen efter.

Dit samtykke vil give den forsøgsansvarlige, sponsor og denne repræsentant direkte adgang til relevante helbredsoplysninger i journalen for at kunne gennemføre, overvåge og kontrollere projektet. I projektet vil behandlingen af personoplysninger følge databeskyttelsesloven og databeskyttelsesforordningen. Efter indsamling af de ønskede informationer vil dine persondata blive fjernet fra vores registreringssystem, og dit personnummer vil blive erstattet af en kode (pseudo-anonymisering).

### Bivirkninger, risici, komplikationer og ulemper

Der er ingen eller kun få kendte risici eller bivirkninger ved at deltage i projektet. Alle prøvetagningsmetoder er velkendte og almindeligt anvendte procedurer, som vi har stor erfaring med og kendskab til. Der kan dog være risici ved undersøgelserne, som vi endnu ikke kender. Vi beder dig derfor om at fortælle, hvis du oplever problemer i forbindelse med prøvetagning og undersøgelser. Hvis vi opdager bivirkninger, som vi ikke allerede har fortalt dig om, vil du naturligvis blive orienteret med det samme, og du vil skulle tage stilling til, om du ønsker at fortsætte med prøvetagning og undersøgelser.

De ekstra blodprøver til projektet tages i forbindelse med de blodprøver, der alligevel tages ved indlæggelse. Risici og bivirkninger ved at få taget en blodprøve kan være ubehageligt, lette smerter og/eller blå mærker, og i nogle tilfælde besvimelse. I sjældne tilfælde kan der opstå en mindre blodansamling eller betændelse ved indstiksstedet.

Urinprøven kan som regel afleveres i et bæger, opsamlet ved toiletbesøg. Er du kateterbærer eller på grund af sygdom ikke selv kan lade vandet, kan det blive nødvendigt at hjælpe vandladningen på vej med et

VEK.nr. 76527

18.12.2020

INDEED-projekt – del A version 1.2

kateter, som er et tyndt plastikrør til indførsel i blæren via urinrøret. Denne procedure kan give let ubehag og eventuelt kortvarig mindre blødning fra slimhinderne.

Det kontraststof, der bruges til ultralydsskanningen, består overvejende af små luftbobler. Det er ikke farligt for kroppen. Der kan opstå milde, kortvarige bivirkninger som fx hovedpine, svimmelhed, ændret smags- og lugtesans. Dette ses hos 0,5-5 %. I meget sjældne tilfælde kan man udvikle en allergisk reaktion, når stoffet sprøjtes ind i blodårerne. Disse alvorlige reaktioner er beskrevet hos mindre end 1/16.500. Du vil derfor blive observeret i 20 minutter efter skanningen, for at se om der skulle opstå bivirkninger eller allergisk reaktion.

MR-skanningen kan godt føles som lang tid. Skanningen er larmende og du har derfor høreværn på. Der er *ingen* strålebelastning eller andre påvirkninger af kroppen forbundet med en MR-skanning.

### Dine prøvesvar

Ønsker du svar på de almindelige blod- og urinundersøgelser, kan du se det på [www.sundhed.dk](http://www.sundhed.dk). Svar på de ekstra blod- og urinundersøgelser i projektet vil ikke fremkomme her, da vi ikke kender betydningen af resultaterne endnu. Har svarene et alarmerende resultat, vil den behandlende læge få besked og vil vurdere, om det har betydning for din behandling.

Skanningsresultaterne vil være synlige for lægerne, der behandler dig, og indgå i deres vurdering og behandling. Hvis vi skulle opdage noget, der kunne give os mistanke om andre sygdomme (f.eks. kræft), vil vi via din læge kontakte dig og tilbyde yderligere udredning. Bidrager skanningerne ikke med viden, der ændrer på din behandling eller diagnose, hører du ikke nærmere til skanningsresultatet.

### Nytte ved projektet

Projektet er vigtigt for at vi fremadrettet kan gøre indlæggelsesforløbet for personer, der indlægges akut med mistanke om nyrebækkenbetændelse, bedre. Projektet vil have en afgørende betydning for praksis på akutafdelingerne, og formentlig hvilken type antibiotika lægen ordinerer. Et mere målrettet antibiotikaforbrug vil bidrage til reduktion af bakterier, der er modstandsdygtige over for antibiotika, og dermed sikre at infektioner i fremtiden også kan behandles med antibiotika.

For dig personligt, vil deltagelse ikke umiddelbart have en betydning for dit behandlingsforløb. Hvis der skulle ske at være nogle særlige komplikationer til din aktuelle sygdom relateret til nyrerne, vil vi dog med de ekstra skanninger formentlig hurtigere erkende dette.

### Udelukkelse fra undersøgelse

Du vil udgå af dele af projektet, hvis nogle af undersøgelserne mislykkes af fx tekniske grunde eller hvis din behandlende læge vurderer, at det er for risikabelt for dig at deltage.

### Adgang til projektets resultater

Projektets samlede resultater vil blive offentliggjort 2024 i videnskabelige tidsskrifter samt på sygehusenes hjemmesider. Resultater med relevans for beslutningstagere i sundhedsvæsenet vil blive offentliggjort i danske medier og tidsskrifter. Det sikres, at ingen deltagere kan genkendes i det, som offentliggøres. Har du interesse i at vide mere om projektets resultater, kan du efter offentliggørelse opsøge dem via <http://www.sygehussonderjylland.dk/wm521282>.

VEK.nr. 76527

18.12.2020

INDEED-projekt – del A version 1.2

*Vi håber, at du med denne information har fået tilstrækkeligt indblik i, hvad det vil sige at deltage i projektet, og at du føler dig rustet til at tage beslutningen om din eventuelle deltagelse. Hvis du vil vide mere, er du meget velkommen til at kontakte os. Information om dine rettigheder er vedlagt denne deltagerinformation sidst i dokumentet (Bilag 1).*

*Hvis du beslutter dig for at deltage i projektet, vil vi bede dig om at underskrive samtykkeerklæringen. Du kan vælge om du vil give samtykke til hele projektet eller kun dele af projektet. Det er frivilligt at deltage i projektet, og du kan når som helst og uden at give en grund trække dit samtykke tilbage. Det vil ikke få konsekvenser for den videre behandling.*

*Yderligere oplysninger kan fås ved henvendelse til*

Professor og overlæge Christian Backer Mogensen  
Fælles Akutmodtagelsen, Sygehus Sønderjylland  
Kresten Philipsens Vej 15 - 6200 Aabenraa  
[Christian.Backer.Mogensen@rsyd.dk](mailto:Christian.Backer.Mogensen@rsyd.dk)  
Tlf: 79971123

#### **Initiativtagere til projektet**

*Projektet er primært udarbejdet i samarbejde mellem Akutafdeling, Biokemisk Afdeling og Mikrobiologisk Afdeling, og Radiologisk Afdeling på Sygehus Sønderjylland, Sygehus Lillebælt og Odense Universitets Hospital. Projektet er forankret på Sygehus Sønderjylland og Institut for Regional Sundhedsforskning på Syddansk Universitet, som er ansøgnings- og bevillingsansvarlige.*

#### **Økonomisk støtte til projektet**

*Projektet har fået økonomisk støttet i form af ph.d. stipendiat fra Syddansk Universitet (1.650.000kr), ph.d.-stipendiat fra Sygehus Sønderjylland (4.800.000kr) samt støtte til drift fra Region Syddanmark (500.000kr). Forsøgsansvarlige har ingen økonomisk tilknytning til støtteejere eller andre interessenter i forsøget. Der vil ikke være en økonomisk kompensation til patienter, der deltager i projektet.*

VEK.nr. 76527

18.12.2020

INDEED-projekt – del A version 1.2

## Participant information - Track C

**Deltagerinformation om deltagelse i videnskabeligt forskningsprojekt for personer, der indlægges akut med mistanke om infektion**

## **Forbedret diagnostik af akutte infektioner**

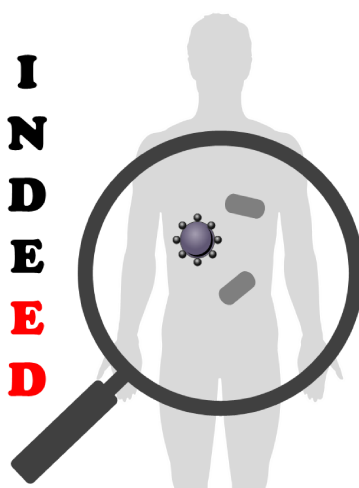

**Infectious Diagnostics in Emergency Departments (INDEED study)**

**Et samarbejdsprojekt på tværs af specialer på Sygehus Sønderjylland, Sygehus Lillebælt og Odense Universitetshospital med udgangspunkt i Akutafdelingerne**

VEK.nr. 76527

18.12.2020

INDEED-projekt – del A version 1.2

*Vi vil spørge, om du vil deltage i et videnskabeligt projekt?*

*Projektet handler om at blive bedre til at diagnosticere akutte infektioner på Akutafdelingen, så en målrettet behandling kan igangsættes så hurtigt som muligt.*

*Før du beslutter, om du vil deltage i projektet, skal du fuldt ud forstå, hvad projektet går ud på, og hvorfor vi gennemfører det. Vi vil derfor bede dig om at læse denne deltagerinformation grundigt.*

*Hvis du beslutter dig for at deltage, vil vi bede dig om at underskrive en samtykkeerklæring. Husk, at du har ret til at rådføre dig hos familie, venner eller bekendte. Du har også ret til betænkningstid før du underskriver, men da der er tale om en akut infektion, som kræver hurtig behandling, beder vi om, at du beslutter dig inden for 30 minutter.*

*Det er frivilligt at deltage i projektet. Du kan når som helst og uden at give en grund trække dit samtykke tilbage. Hvis du trækker dit samtykke om deltagelse i projektet tilbage, vil det ikke få konsekvenser for din videre behandling.*

## Projektets mål

De redskaber og undersøgelser, der eksisterer i dag til at finde ud af, hvilken type infektion, der er skyld i indlæggelsen på Akutmodtagelsen, har mange begrænsninger. Det udfordrer lægen i at stille en sikker diagnose inden for kort tid og igangsætte en målrettet behandling. Det kan få konsekvenser for den enkelte persons indlæggelsesforløb. Hvis man behandler med antibiotika som dækker flere bakterier end nødvendigt vil det også bidrage til udviklingen af bakterier, som er modstandsdygtige over for mange antibiotika.

Projektet har derfor til formål at finde bedre redskaber, som kan hjælpe lægen til at stille en sikker diagnose inden for få timer for personer, indlagt akut med mistanke om infektion.

## Det undersøger projektet

Projektet vil undersøge

- hvilke symptomer, tegn og forhold, der kendetegner de forskellige typer af infektioner og sygdomsgraden
- hvilke markører for infektion i blodet, der bedst kan angive typen af infektion og sygdomsgraden
- om en ny metode til at måle bakterier i urinen er nyttig

## Plan for projektet

Projektet foregår på Fælles Akutmodtagelsen i Aabenraa, Sygehus Sønderjylland, på Akutafdelingen i Kolding, Sygehus Lillebælt, og på Fælle Akut Modtagelsen i Odense, Odense Universitetshospital. Fra februar 2021 til vinteren 2021/22 vil 1000 voksne personer, som indlægges akut med mistanke om infektion på de tre akutafdelinger, blive inviteret til at deltage.

VEK.nr. 76527

18.12.2020

INDEED-projekt – del A version 1.2

Personalet vil i forbindelse med din indlæggelse opsøge og informere dig om projektet, og tilbyde deltagelse i projektet. Da det er vigtigt at en akut infektion bliver behandlet hurtigt, vil vi bede dig om at tilkænde give din beslutning inden for en halv time.

### Det indebærer deltagelse i projektet for dig

Deltagelse i projektet betyder, at du vil modtage den normale behandling, afdelingen tilbyder, og derudover få foretaget ekstra undersøgelser.

Vi vil stille dig nogle spørgsmål omkring dine symptomer, tidligere og aktuelle sygdomme, og hvordan du har det. Vi beder i den forbindelse adgang til din patientjournal, for at følge op på eventuelle tidligere indlæggelser, den aktuelle indlæggelse, og eventuelle indlæggelser inden for den næste måned efter du er udskrevet.

Vi vil tage 14mL ekstra blod svarende til 2 ekstra rør, når du alligevel får taget blodprøve, og hjælpe dig med at aflevere en urinprøve.

Det blod og urin, der indhentes til projektet, vil blive destrueret, når projektet er afsluttet.

Dit samtykke vil give den forsøgsansvarlige, sponsor og denne repræsentant direkte adgang til relevante helbredsoplysninger i journalen for at kunne gennemføre, overvåge og kontrollere projektet. I projektet vil behandlingen af personoplysninger følge databeskyttelsesloven og databeskyttelsesforordningen. Efter indsamling af de ønskede informationer vil dine persondata blive fjernet fra vores registreringssystem, og dit personnummer vil blive erstattet af en kode (pseudo-anonymisering).

### Bivirkninger, risici, komplikationer og ulemper

Der er ingen eller kun få kendte risici eller bivirkninger ved at deltage i projektet. Alle prøvetagningsmetoder er velkendte og almindeligt anvendte procedurer, som vi har stor erfaring med og kendskab til. Der kan dog være risici ved undersøgelserne, som vi endnu ikke kender. Vi beder dig derfor om at fortælle, hvis du oplever problemer i forbindelse med prøvetagning og undersøgelser. Hvis vi opdager bivirkninger, som vi ikke allerede har fortalt dig om, vil du naturligvis blive orienteret med det samme, og du vil skulle tage stilling til, om du ønsker at fortsætte med prøvetagning og undersøgelser.

De ekstra blodprøver til projektet tages i forbindelse med de blodprøver, der alligevel tages ved indlæggelse. Risici og bivirkninger ved at få taget en blodprøve kan være ubehageligt, lette smerter og/eller blå mærker, og i nogle tilfælde besvimelse. I sjældne tilfælde kan der opstå en mindre blodansamling eller betændelse ved indstiksstedet.

Urinprøven kan som regel afleveres i et bæger, opsamlet ved toiletbesøg. Er du kateterbærer eller på grund af sygdom ikke selv kan lade vandet, kan det blive nødvendigt at hjælpe vandladningen på vej med et kateter, som er et tyndt plastikrør til indførsel i blæren via urinrøret. Denne procedure kan give let ubehag og eventuelt kortvarig mindre blødning fra slimhinderne.

VEK.nr. 76527

18.12.2020

INDEED-projekt – del A version 1.2

## Dine prøvesvar

Ønsker du svar på de almindelige blod- og urinundersøgelser, kan du se det på [www.sundhed.dk](http://www.sundhed.dk). Svar på de ekstra blod- og urinundersøgelser i projektet vil ikke fremkomme her, da vi ikke kender betydningen af resultaterne endnu. Har svarene et alarmerende resultat, vil den behandlende læge få besked og vil vurdere, om det har betydning for din behandling.

## Nytte ved projektet

Projektet er vigtigt for at vi fremadrettet kan gøre indlæggelsesforløbet for personer, der indlægges akut med mistanke om infektion, bedre. Projektet vil have en afgørende betydning for praksis på akutafdelingerne, og formentligt hvilken type antibiotika lægen ordinerer. Et mere målrettet antibiotikaforbrug vil bidrage til reduktion af bakterier, der er modstandsdygtige over for antibiotika, og dermed sikre at infektioner i fremtiden også kan behandles med antibiotika.

For dig personligt, vil deltagelse ikke have en betydning for dit behandlingsforløb, da resultaterne af undersøgelserne først vil blive evalueret når projektet er afsluttet på akutafdelingen.

## Udelukkelse fra undersøgelse

Du vil udgå af dele af projektet, hvis nogle af undersøgelserne mislykkes af fx tekniske grunde

## Adgang til projektets resultater

Projektets samlede resultater vil blive offentliggjort 2024 i videnskabelige tidsskrifter samt på sygehusenes hjemmesider. Resultater med relevans for beslutningstagere i sundhedsvæsenet vil blive offentliggjort i danske medier og tidsskrifter. Det sikres, at ingen deltagere kan genkendes i det, som offentliggøres. Har du interesse i at vide mere om projektets resultater, kan du efter offentliggørelse opsøge dem via <http://www.sygehussonderjylland.dk/wm521282>.

*Vi håber, at du med denne information har fået tilstrækkeligt indblik i, hvad det vil sige at deltage i projektet, og at du føler dig rustet til at tage beslutningen om din eventuelle deltagelse. Hvis du vil vide mere, er du meget velkommen til at kontakte os. Information om dine rettigheder er vedlagt denne deltagerinformation sidst i dokumentet (Bilag 1).*

*Hvis du beslutter dig for at deltage i projektet, vil vi bede dig om at underskrive samtykkeerklæringen. Du kan vælge om du vil give samtykke til hele projektet eller kun dele af projektet. Det er frivilligt at deltage i projektet, og du kan når som helst og uden at give en grund trække dit samtykke tilbage. Det vil ikke få konsekvenser for den videre behandling.*

*Yderligere oplysninger kan fås ved henvendelse til*

Professor og overlæge Christian Backer Mogensen  
Fælles Akutmodtagelsen, Sygehus Sønderjylland  
Kresten Philipsens Vej 15 - 6200 Aabenraa  
[Christian.Backer.Mogensen@rsyd.dk](mailto:Christian.Backer.Mogensen@rsyd.dk)  
Tlf: 79971123

VEK.nr. 76527

18.12.2020

INDEED-projekt – del A version 1.2

**Initiativtagere til projektet**

Projektet er primært udarbejdet i samarbejde mellem Akutafdeling, Biokemisk Afdeling og Mikrobiologisk Afdeling, og Radiologisk Afdeling på Sygehus Sønderjylland, Sygehus Lillebælt og Odense Universitets Hospital. Projektet er forankret på Sygehus Sønderjylland og Institut for Regional Sundhedsforskning på Syddansk Universitet, som er ansøgnings- og bevillingsansvarlige.

**Økonomisk støtte til projektet**

Projektet har fået økonomisk støttet i form af ph.d. stipendiat fra Syddansk Universitet (1.650.000kr), ph.d.-stipendiat fra Sygehus Sønderjylland (4.800.000kr) samt støtte til drift fra Region Syddanmark (500.000kr). Forsøgsansvarlige har ingen økonomisk tilknytning til støttegivere eller andre interessenter i forsøget. Der vil ikke være en økonomisk kompensation til patienter, der deltager i projektet.



VEK.nr. 76527

18.12.2020

INDEED-projekt – del A version 1.2

## Bilag 1: Forsøgspersoners rettigheder i et sundhedsvidenskabeligt forskningsprojekt

Som deltager i et sundhedsvidenskabeligt forskningsprojekt skal du vide, at:

- din deltagelse i forskningsprojektet er helt frivillig og kun kan ske efter, at du har fået både skriftlig og mundtlig information om forskningsprojektet og underskrevet samtykkeerklæringen.
- du til enhver tid mundtligt, skriftligt eller ved anden klar tilkendegivelse kan trække dit samtykke til deltagelse tilbage og udtræde af forskningsprojektet. Såfremt du trækker dit samtykke tilbage påvirker dette ikke din ret til nuværende eller fremtidig behandling eller andre rettigheder, som du måtte have.
- du har ret til at tage et familiemedlem, en ven eller en bekendt med til informations samtalen.
- du har ret til betænkningstid, før du underskriver samtykkeerklæringen.
- oplysninger om dine helbredsforhold, øvrige rent private forhold og andre fortrolige oplysninger om dig, som fremkommer i forbindelse med forskningsprojektet, er omfattet af tavshedspligt. behandling af oplysninger om dig, herunder oplysninger i dine blodprøver og væv, sker efter reglerne i databeskyttelsesforordningen, databeskyttelsesloven samt sundhedsloven. Den dataansvarlige i forsøget skal orientere dig nærmere om dine rettigheder efter databeskyttelsesreglerne.
- der er mulighed for at få aktindsigt i forsøgsprotokoller efter offentlighedslovens bestemmelser. Det vil sige, at du kan få adgang til at se alle papirer vedrørende forsøgets tilrettelæggelse, bortset fra de dele, som indeholder forretningshemmeligheder eller fortrolige oplysninger om andre.
- der er mulighed for at klage og få erstatning efter reglerne i lov om klage- og erstatningsadgang inden for sundhedsvæsenet. Hvis der under forsøget skulle opstå en skade kan du henvende dig til Patienterstatningen, se nærmere på [www.patienterstatningen.dk](http://www.patienterstatningen.dk).

Dette tillæg er udarbejdet af det Videnskabsetiske komitéssystem og kan vedhæftes den skriftlige information om det sundhedsvidenskabelige forskningsprojekt. Spørgsmål til et konkret projekt skal rettes til projektets forsøgsansvarlige. Generelle spørgsmål til forsøgspersoners rettigheder kan rettes til den komité, som har godkendt projektet.

Revideret 21. september 2019

VEK.nr. 76527

18.12.2020

INDEED-projekt – del A version 1.2

## Written consent form – track A, B, and C

*Informeret samtykke til at deltage i et sundhedsvidenskabeligt projekt***Forbedret diagnostik af akutte infektioner**  
**- Infectious Diseases in Emergency Departments (INDEED study)****Erklæring fra forsøgspersonen:**

Jeg har fået skriftlig og mundtlig information, og jeg ved nok om formål, metode, fordele og ulemper til at sige ja til at deltage.

Jeg ved, at det er frivilligt at deltage, og jeg altid kan trække mit samtykke tilbage uden at miste mine nuværende eller fremtidige rettigheder til behandling.

Jeg giver hermed samtykke til at deltage i projektet og har fået en kopi af dette samtykkeark samt en kopi af den skriftlige information om projektet til eget brug.

Forsøgspersonens navn: \_\_\_\_\_

Forsøgspersonens Cpr-nummer: \_\_\_\_\_

Dato: \_\_\_\_\_ Underskrift: \_\_\_\_\_

Hvis der kommer nye væsentlige helbredsoplysninger frem om dig i forskningsprojektet vil du blive informeret. Vil du **frabede** dig information om nye væsentlige helbredsoplysninger, som kommer frem i forskningsprojektet, bedes du markere her: \_\_\_\_\_ (sæt x)

**Erklæring fra den, der afgiver information:**

Jeg erklærer, at forsøgspersonen har modtaget mundtlig og skriftlig information om forsøget.

Efter min overbevisning er der givet tilstrækkelig information til, at der kan træffes beslutning om deltagelse i forsøget.

Navnet på den, der har afgivet information:

Dato: \_\_\_\_\_ Underskrift: \_\_\_\_\_

## Appendix II - Biological specimens

In this study, blood will be collected for analysis of serum procalcitonin (PCT) and Serum soluble urokinase plasminogen activator receptor (suPAR) and for a research biobank to store blood until analysis is feasible.

|                        | Blood for analysis of PCT and suPAR                                                                                                                                                                                                                                                                                                                                                                                                                                                                                                                                                                                                                                                                                                                                                                                                                                                                                                                                                                                                                                          | Blood for research biobank                                                                                                                                                                                                                 |
|------------------------|------------------------------------------------------------------------------------------------------------------------------------------------------------------------------------------------------------------------------------------------------------------------------------------------------------------------------------------------------------------------------------------------------------------------------------------------------------------------------------------------------------------------------------------------------------------------------------------------------------------------------------------------------------------------------------------------------------------------------------------------------------------------------------------------------------------------------------------------------------------------------------------------------------------------------------------------------------------------------------------------------------------------------------------------------------------------------|--------------------------------------------------------------------------------------------------------------------------------------------------------------------------------------------------------------------------------------------|
| <b>Collection</b>      | The blood will be collected in an EDTA plasma tube.                                                                                                                                                                                                                                                                                                                                                                                                                                                                                                                                                                                                                                                                                                                                                                                                                                                                                                                                                                                                                          | Biobank blood is only collected for patient in track A and includes one tube of EDTA plasma and one tube of LiHeparin plasma.                                                                                                              |
| <b>Storage</b>         | <p>At two of the sites, the analysis will be performed within is tested within two hours from the collection of the blood sample. At the third site, samples will be stored locally in a -80 °C freezer.</p> <p>The samples are pseudonymized with a code to protect the identity of the participants. All samples and code lists are stored safely and separately to prevent unauthorized access.</p>                                                                                                                                                                                                                                                                                                                                                                                                                                                                                                                                                                                                                                                                       | All samples will be stored locally in a -80 °C freezer. The samples are pseudonymized with a code to protect the identity of the participants. All samples and code lists are stored safely and separately to prevent unauthorized access. |
| <b>Sample analysis</b> | <p><i>Serum procalcitonin (PCT)</i></p> <p>Serum PCT concentration is quantified with an automated sandwich immunoassay "ECLIA" (Elecsys®, BRAHMS PCT-analyses) on Cobas e801. Calibration is performed after Cobas e pack has been registered in the instrument and is standardized to the BRAHMS PCT LIA assay. The correlation of Elecsys BRAHMS PCT analyses has been compared to BRAHMS PCT LIA and to BRAHMS PCT sensitive KRYPTOR with similar results of <math>r=0.981</math> and <math>r=0.988</math> respectively.</p> <p>Quality control is performed after each calibration and regularly following the standard procedure. The manufacture states a lower limit of detection 0.02 µg/L up to 100 µg/L. The functional assay sensitivity is identified at <math>\leq 0.06</math> ng/mL. In this study a range from 0.06 µg/L to 100 µg/L will be measured. Normal healthy individuals have a PCT concentration <math>&lt; 0.1</math> µg/L. All plasma samples are screened for potential interfering substances like bilirubin, hemoglobin and lipids and no</p> | Molecular analysis for future use in ancillary studies will take place after all samples have been collected.                                                                                                                              |

|                                                                                                                                                                                                                                                                                                                                                                                                                                                                                                                                                                                                                                                                                                                                                                                                                                                                                                                                                                                                                                                                                                                                                                                                                                                                                                                                                                                                                                                                                                                                                                                                                                                                                                                                                                                         |  |
|-----------------------------------------------------------------------------------------------------------------------------------------------------------------------------------------------------------------------------------------------------------------------------------------------------------------------------------------------------------------------------------------------------------------------------------------------------------------------------------------------------------------------------------------------------------------------------------------------------------------------------------------------------------------------------------------------------------------------------------------------------------------------------------------------------------------------------------------------------------------------------------------------------------------------------------------------------------------------------------------------------------------------------------------------------------------------------------------------------------------------------------------------------------------------------------------------------------------------------------------------------------------------------------------------------------------------------------------------------------------------------------------------------------------------------------------------------------------------------------------------------------------------------------------------------------------------------------------------------------------------------------------------------------------------------------------------------------------------------------------------------------------------------------------|--|
| <p>results will be included with significant interference. There is no hook-effect in PCT concentrations measured up to 1000 µg/L.</p> <p>The precision of PCT assay is expected to be &lt;3% CV or similar. This is estimated from the internal quality controls using PC PCT1 (lot.419495) and PC PCT2 (lot.419497) at target PCT levels 0.49 and 9.44 ng/L showing a precision of 2.67 % CV and 2.63 % CV, respectively.</p>                                                                                                                                                                                                                                                                                                                                                                                                                                                                                                                                                                                                                                                                                                                                                                                                                                                                                                                                                                                                                                                                                                                                                                                                                                                                                                                                                         |  |
| <p><i>Serum soluble urokinase plasminogen activator receptor (suPAR)</i></p> <p>Serum suPAR is measured using suPARnostic® Tubilatex assay reagents (validated on Cobas® c111) protocol for Cobas® c702 and c502 applying the Multi-Pack cassettes (Roche Diagnostics, Mannheim, Germany) (42). Calibration is performed at least once a month or in connection to a new batch of Turbilatex reagents, after calibration a quality control is performed.</p> <p>Measure range of the suPARnostic® Tubilatex assay is 1.8 µg/L to 16.0 µg/L on Cobas® c502 analyzer. The assay's limit of blank, limit of detection and limit of quantification are 1.0 µg/L, 1.2 µg/L and 1.2 µg/L respectively. Expected values for patients attending ED's range from 3-6 µg/L and can reach double digits in patients with severe disease related to poor prognosis. High concentration of SuPAR above 20 µg/L may be false positive results related with interference used by high concentration of hemoglobin, lipids or bilirubin. There is no identified interference in concentrations of bilirubin &gt;350 µmol/L, triglycerides &gt; 3.3g/L, hemoglobin &gt; 1.4 g/L or rheumatoid factor &gt; 440 IU/mL. The highest concentration of suPAR is tested at 47.5 µg/L without hook-effect and the linearity is from 1.8 µg/L to 26.6 µg/L. The mean value of precision of the test is 3.4 µg/L, 7.1 µg/L, 10.2 µg/L for low, middle and high concentrations of SuPAR respectively. The accuracy of suPARnostic® Tubilatex is compared with suPARnostic® ELISA with similar results &lt; 15 % of difference.</p> <p>The precision of suPAR assay is expected to be &lt; 5% CV or similar. This is estimated from external quality assessment material, HK 19 (Product code 2226 DK, Lot. No.</p> |  |

|                   |                                                                                                                                                                                                                                          |                                                                                                                                                                                                                                                                                                                                         |
|-------------------|------------------------------------------------------------------------------------------------------------------------------------------------------------------------------------------------------------------------------------------|-----------------------------------------------------------------------------------------------------------------------------------------------------------------------------------------------------------------------------------------------------------------------------------------------------------------------------------------|
|                   | 201808) analyzed repeatedly during five different days on c502 and c702 and the mean content of suPAR determined by turbidimetry was 2.15 mg/ L and 2.03 mg/L (CV% 4.56 and 5.52) for the Cobas c502 and c702 instruments, respectively. |                                                                                                                                                                                                                                                                                                                                         |
| <b>Evaluation</b> | The results will be saved in a study database and not be visible for the physician in the medical journal.                                                                                                                               | The results will be saved in a study database.<br><br>The expiry date of the research biobank is expected to be October 2022. After expiry date, the remaining material in the research bank will be destroyed.                                                                                                                         |
| <b>Location</b>   | Samples will be located at Bloodsamples, Biochemistry and Immunology, University Hospital of Southern Denmark, Aabenraa, Denmark                                                                                                         | Samples will be located at:<br><br>- Bloodsamples, Biochemistry and Immunology, University Hospital of Southern Denmark, Aabenraa, Denmark<br><br>- Biochemistry and Immunology, University Hospital of Southern Denmark, Kolding, Denmark<br><br>- Clinical Biochemistry and Pharmacology, Odense University Hospital, Odense, Denmark |

## Appendix III - Schedule of enrollment, interventions and assessments

|                                   | STUDY PERIOD |            |                 |     |      |      |     |     |      |           |     |
|-----------------------------------|--------------|------------|-----------------|-----|------|------|-----|-----|------|-----------|-----|
|                                   | RECRUITMENT  | ALLOCATION | POST-ALLOCATION |     |      |      |     |     |      | CLOSE-OUT |     |
| TIMEPOINT<br>(h=hours, d=days)    | -½h          | 0h         | <1h             | <4h | <24h | <48h | <5d | <7d | <14d | 30d       | 90d |
| <b>ENROLMENT</b>                  |              |            |                 |     |      |      |     |     |      |           |     |
| Eligibility screen                | x            |            |                 |     |      |      |     |     |      |           |     |
| Informed consent                  | x            |            |                 |     |      |      |     |     |      |           |     |
| Physician assessment              | x            |            |                 |     |      |      |     |     |      |           |     |
| Allocation                        |              | x          |                 |     |      |      |     |     |      |           |     |
| <b>INTERVENTIONS – all tracks</b> |              |            |                 |     |      |      |     |     |      |           |     |
| Collection of blood sample        |              |            | x               |     |      |      |     |     |      |           |     |
| • PCT analysis                    |              |            |                 |     |      |      |     |     | x    |           |     |
| • suPAR analysis                  |              |            |                 |     |      |      |     |     | x    |           |     |
| Collection of urine sample        |              |            |                 | x   |      |      |     |     |      |           |     |

|                                                                                        |  |  |   |   |   |  |  |   |  |  |  |
|----------------------------------------------------------------------------------------|--|--|---|---|---|--|--|---|--|--|--|
| • POC-UFC analysis                                                                     |  |  |   | x |   |  |  |   |  |  |  |
| <b>INTERVENTIONS – track A</b>                                                         |  |  |   |   |   |  |  |   |  |  |  |
| Collection of sputum sample                                                            |  |  | x |   |   |  |  |   |  |  |  |
| • POC-PCR analysis and presented to the treating physician                             |  |  |   | x |   |  |  |   |  |  |  |
| POC-US                                                                                 |  |  |   |   | x |  |  |   |  |  |  |
| ULDCT and HRCT                                                                         |  |  |   |   | x |  |  |   |  |  |  |
| <b>INTERVENTIONS – track B</b>                                                         |  |  |   |   |   |  |  |   |  |  |  |
| CEUS                                                                                   |  |  |   |   | x |  |  |   |  |  |  |
| POC-US                                                                                 |  |  |   |   | x |  |  |   |  |  |  |
| MRI                                                                                    |  |  |   |   | x |  |  |   |  |  |  |
| <b>ASSESSMENTS</b>                                                                     |  |  |   |   |   |  |  |   |  |  |  |
| Collection of patient characteristic (patient interview and look up in medical record) |  |  |   | x |   |  |  |   |  |  |  |
| CRP results                                                                            |  |  |   | x |   |  |  |   |  |  |  |
| Dipstick result                                                                        |  |  |   | x |   |  |  |   |  |  |  |
| Urine routine culturing result                                                         |  |  |   |   |   |  |  | x |  |  |  |

|                                         |  |  |  |   |  |   |   |   |  |  |   |
|-----------------------------------------|--|--|--|---|--|---|---|---|--|--|---|
| Sputum routine culturing and PCR result |  |  |  |   |  |   |   | x |  |  |   |
| Antibiotic prescription                 |  |  |  | x |  | x | x |   |  |  |   |
| Expert panel reference standard         |  |  |  |   |  |   |   | x |  |  |   |
| Length of stay                          |  |  |  |   |  |   |   |   |  |  | x |
| Mortality                               |  |  |  |   |  |   |   |   |  |  | x |
| Admission to ICU and readmission        |  |  |  |   |  |   |   |   |  |  | x |



### Appendix IV - Targets in POC-PCR

The BIOFIRE® FILMARRAY® Pneumonia plus Panel is testing for 27 of the most common pathogens involved in Lower respiratory tract infections and 7 genetic markers of antibiotic resistance.

| Bacteria (semi quantitative)                         | Antibiotic Resistance Genes                                                                                                                           |
|------------------------------------------------------|-------------------------------------------------------------------------------------------------------------------------------------------------------|
| <i>Acinetobacter calcoaceticus-baumannii</i> complex | <b>ESBL</b><br>CTX-M<br><br><b>Carbapenemases</b><br>KPC<br>NDM<br>Oxa48-like<br>VIM<br>IMP<br><br><b>Methicilin Resistance</b><br>mecA/mecC and MREJ |
| <i>Enterobacter cloacae</i>                          |                                                                                                                                                       |
| <i>Escherichia coli</i>                              |                                                                                                                                                       |
| <i>Haemophilus influenzae</i>                        |                                                                                                                                                       |
| <i>Klebsiella aerogenes</i>                          |                                                                                                                                                       |
| <i>Klebsiella oxytoca</i>                            |                                                                                                                                                       |
| <i>Klebsiella pneumoniae</i> group                   |                                                                                                                                                       |
| <i>Moraxella catarrhalis</i>                         |                                                                                                                                                       |
| <i>Proteus</i> spp.                                  |                                                                                                                                                       |
| <i>Pseudomonas aeruginosa</i>                        |                                                                                                                                                       |
| <i>Serratia marcescens</i>                           |                                                                                                                                                       |
| <i>Staphylococcus aureus</i>                         |                                                                                                                                                       |
| <i>Streptococcus agalactiae</i>                      |                                                                                                                                                       |
| <i>Streptococcus pneumoniae</i>                      |                                                                                                                                                       |
| <i>Streptococcus pyogenes</i>                        |                                                                                                                                                       |

| Atypical Bacteria (Qualitative) | Viruses                                                                                                                                                                                                                               |
|---------------------------------|---------------------------------------------------------------------------------------------------------------------------------------------------------------------------------------------------------------------------------------|
| <i>Legionella pneumophila</i>   | Influenza A<br><br>Influenza B<br>Adenovirus<br>Coronavirus<br>Parainfluenza virus<br>Respiratory Syncytial virus<br>Human Rhinovirus/Enterovirus<br>Human Metapneumovirus<br>Middle East Respiratory Syndrome Coronavirus (MERS-CoV) |
| <i>Mycoplasma pneumoniae</i>    |                                                                                                                                                                                                                                       |
| <i>Chlamydia pneumoniae</i>     |                                                                                                                                                                                                                                       |

## Appendix V – recommended action list

# Guidance of results from POC-PCR *FilmArray® Pneumonia Panel plus*

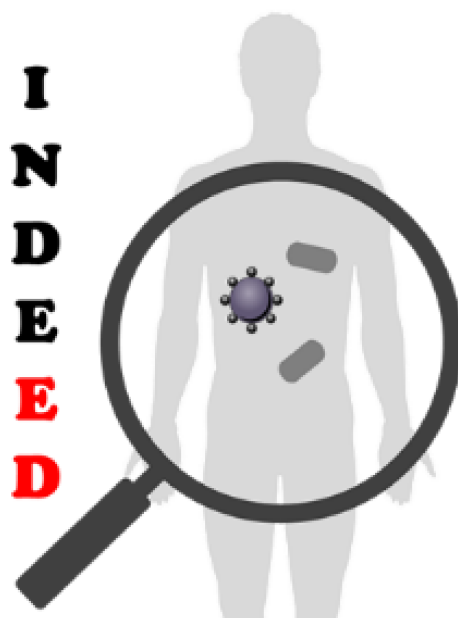

This guidance is developed to the INDEED-study (Infectious diseases in Emergency Department).

Emergency department physicians from Hospital Sønderjylland in Aabenraa, Hospital Lillebælt in Kolding, and Odense University Hospital in Odense, will receive this action card along with the results from sputum sample analyses.

In case of doubt in the interpretation of the results, the physician is encouraged to contact the local clinical microbiologist.

| Agens                                                        | Association with CAP#        | Remarks                                                                                                                                                                                                                                                                          | Antibiotics                                                                                                                                                       |                                                                                                                |
|--------------------------------------------------------------|------------------------------|----------------------------------------------------------------------------------------------------------------------------------------------------------------------------------------------------------------------------------------------------------------------------------|-------------------------------------------------------------------------------------------------------------------------------------------------------------------|----------------------------------------------------------------------------------------------------------------|
|                                                              |                              |                                                                                                                                                                                                                                                                                  | First choice                                                                                                                                                      | Penicillin allergy                                                                                             |
| <i>Streptococcus pneumoniae</i> *                            | Frequent and likely pathogen | Part of the normal microbiota in upper respiratory tract.<br>May be contamination with pharyngeal microbiota.                                                                                                                                                                    | Benzylpenicillin 1.2g (2 mill.IE) x4 i.v.<br><i>or</i><br>Phenoxyethylpenicillin 0.6g (1 mill.IE) x4 oral                                                         | Cefuroxime 1.5g x 3 i.v.<br><i>or</i><br>Roxithromycin 300mg x1 oral                                           |
| <i>Haemophilus influenzae</i> *                              | Frequent and likely pathogen |                                                                                                                                                                                                                                                                                  | Ampicillin 2g x4 i.v.<br><i>or</i><br>Benzylpenicillin 1.2g (2 mill. IE) x4 i.v.<br><i>or</i><br>Piv-ampicillin 1g x3 oral<br><i>or</i><br>Amoxicillin 1g x3 oral | Cefuroxime 1.5g x 3 i.v.<br><i>or</i><br>Doxycycline 100mg x2 first 24 hours oral followed by 100mg x1 oral    |
| <i>Streptococcus pyogenes</i> *                              | Probable, but rare pathogen  | Part of the normal microbiota in upper respiratory tract.<br>These pathogens relatively often represent contamination with pharyngeal microbiota.<br>Infection caused by <i>Streptococcus pyogenes</i> or <i>Staphylococcus aureus</i> will usually results in severe pneumonia. | Benzylpenicillin 1.2g (2 mill. IE) x4 i.v.                                                                                                                        | Cefuroxime 1.5g x3 i.v.                                                                                        |
| <i>Streptococcus agalactiae</i> *                            | Rare pathogen in adults      |                                                                                                                                                                                                                                                                                  | Benzylpenicillin 1.2g (2 mill. IE) x4 i.v.                                                                                                                        | Cefuroxime 1.5g x3 i.v.                                                                                        |
| <i>Staphylococcus aureus</i> *                               | Probable, but rare pathogen  |                                                                                                                                                                                                                                                                                  | Cloxacillin 1g x4 i.v.                                                                                                                                            | Cefuroxime 1.5g x3 i.v.                                                                                        |
| <i>Moraxella catarrhalis</i> *                               | Probable pathogen            |                                                                                                                                                                                                                                                                                  | Piperacillin-tazobactam 4/0.5g x3 i.v.<br><i>or</i><br>amoxicillin-clavulanic acid 500/125mg x3 oral                                                              | Cefuroxime 1.5g x3 i.v.<br><i>or</i><br>Roxithromycin 300mg x1 oral<br><i>or</i><br>Azithromycin 500mg x1 oral |
|                                                              |                              |                                                                                                                                                                                                                                                                                  |                                                                                                                                                                   |                                                                                                                |
| <i>Legionella pneumophila</i><br><i>Mycoplasma pneumonia</i> | Likely causative pathogen    | Is not a part of the normal respiratory microbiota.                                                                                                                                                                                                                              | Azithromycin 500mg x1 i.v./oral                                                                                                                                   |                                                                                                                |
| <i>Chlamydia pneumoniae</i>                                  | Probable causative pathogen  | Is not a part of the normal respiratory microbiota<br>Will usually cause mild infections. In case of severe infection, other pathogens/super-infection should be considered.                                                                                                     | Azithromycin 500mg x1 i.v./oral                                                                                                                                   |                                                                                                                |

| Agens                                                                                                                                                                                                                                                                                                                                   | Association with CAP <sup>#</sup>                                                                                                                                                                                                                                                    | Remarks                                                                                                                                                                                                   | Antibiotics                                                                                                                                       |
|-----------------------------------------------------------------------------------------------------------------------------------------------------------------------------------------------------------------------------------------------------------------------------------------------------------------------------------------|--------------------------------------------------------------------------------------------------------------------------------------------------------------------------------------------------------------------------------------------------------------------------------------|-----------------------------------------------------------------------------------------------------------------------------------------------------------------------------------------------------------|---------------------------------------------------------------------------------------------------------------------------------------------------|
| <i>Pseudomonas aeruginosa</i> *<br><i>Acinetobacter calcoaceticus-baumannii complex</i> *<br><i>Enterobacter cloacae</i> *<br><i>Escherichia coli</i> *<br><i>Klebsiella (Enterobacter) aerogenes</i> *<br><i>Klebsiella oxytoca</i> *<br><i>Klebsiella pneumoniae group</i> *<br><i>Proteus spp.</i> *<br><i>Serratia marcescens</i> * | Very rare causative pathogens                                                                                                                                                                                                                                                        | These findings usually represents colonization.                                                                                                                                                           | These findings should typically not lead to adjustment of empirical antimicrobial treatment.                                                      |
| Influenza A<br>Influenza B                                                                                                                                                                                                                                                                                                              | Frequent pathogens                                                                                                                                                                                                                                                                   | Is not a part of the normal respiratory microbiota Bacterial superinfection can occur.                                                                                                                    | Consider whether the patient's pneumonia symptoms can be explained by viral infection, and whether antibiotic treatment is necessary / indicated. |
| Parainfluenza virus<br>Respiratory Syncytial<br>Adenovirus<br>Coronavirus<br>(does not include SARS-CoV-2)<br>Human Rhinovirus/Enterovirus<br>Human Metapneumovirus                                                                                                                                                                     | Probable pathogens                                                                                                                                                                                                                                                                   | Usually causes mild infections. In case of severe infection, other pathogens / superinfection should be considered.<br><br>May be an accidental finding due to previous /recent / asymptomatic infection. |                                                                                                                                                   |
| Not detected<br>(POC-PCR(FilmArray) is negative)                                                                                                                                                                                                                                                                                        | A negative result does not rule out pneumonia, but means that CAP caused by the most common pathogens is less likely. Consider whether the pneumonia diagnosis is correct and consider investigation for rare causes of pneumonia (e.g. tuberculosis or <i>Chlamydia psittaci</i> ). |                                                                                                                                                                                                           |                                                                                                                                                   |

#CAP: Community-Acquired Pneumonia

\*: concentration (copies/mL) is reported in the POC-PCR (FilmArray) result

Most bacterial causative pathogens of CAP are also part of the normal respiratory microbiota or may colonize the upper respiratory tract, and the clinical relevance of these findings must always be assessed carefully.

For the bacterial agents marked with “\*”, a concentration (copies/mL) is reported in the POC-PCR (FilmArray) result. There is a reasonable correlation between copies/mL and the culture-based measure “CFU/mL”, however, “copies/mL” is typically a factor of 10-100 higher than the corresponding “CFU/mL”.

The limits of significance are not well established and depend probably on the agent, the quality of the sample and the clinical context - and must therefore be used with caution. The Infectious Diseases Society of America and the American Society of Microbiology<sup>1</sup> propose the following culture-based limits for hospital-acquired pneumonia:

| Culture-based measure                    | POC-PCR (FilmArray) concentration            | Interpretation (caution)            |
|------------------------------------------|----------------------------------------------|-------------------------------------|
| < 10 <sup>4</sup> CFU/mL                 | ≈ < 10 <sup>5</sup> copies/mL                | Indicates mixture with normal flora |
| 10 <sup>4</sup> – 10 <sup>5</sup> CFU/mL | ≈ 10 <sup>5</sup> -10 <sup>6</sup> copies/mL | Gray zone                           |
| > 10 <sup>5</sup> CFU/mL                 | ≈ >10 <sup>6</sup> copies/mL                 | Indicates real findings             |

Developed by microbiologist Flemming Rosenvinge, Department of Clinical Microbiology, Odense University Hospital in Odense, and microbiologist Claus Østergaard, Department of Clinical Microbiology, Hospital Lillebælt in Kolding, Denmark

Version 1.1 – February 7th 2021

<sup>1</sup> Miller, J. M., Binnicker, M. J., Campbell, S., et al. A Guide to Utilization of the Microbiology Laboratory for Diagnosis of Infectious Diseases: 2018 Update by the Infectious Diseases Society of America and the American Society for Microbiology. *Clinical Infectious Diseases*, 67(6), e1–e94. <https://doi.org/10.1093/cid/ciy381>

## Appendix VI - Template for expert panel reference standard

The template for the expert panel reference standard is illustrated in the table:

| Main question                                                                                                                                                                                                                                                                                                                                                                                                                                                                                                                                                                                                                                | Sub-question                                                                                                                                                                                                                                                                                                                                                          |
|----------------------------------------------------------------------------------------------------------------------------------------------------------------------------------------------------------------------------------------------------------------------------------------------------------------------------------------------------------------------------------------------------------------------------------------------------------------------------------------------------------------------------------------------------------------------------------------------------------------------------------------------|-----------------------------------------------------------------------------------------------------------------------------------------------------------------------------------------------------------------------------------------------------------------------------------------------------------------------------------------------------------------------|
| Does the patient has an infection?<br><input type="checkbox"/> Yes <input type="checkbox"/> No                                                                                                                                                                                                                                                                                                                                                                                                                                                                                                                                               | If yes, what was the focus of infection?<br><input type="checkbox"/> Respiratory <input type="checkbox"/> Urinary tract <input type="checkbox"/> Other                                                                                                                                                                                                                |
|                                                                                                                                                                                                                                                                                                                                                                                                                                                                                                                                                                                                                                              | If yes, was the focus of infection identified within 48 hours?<br><input type="checkbox"/> Yes <input type="checkbox"/> No                                                                                                                                                                                                                                            |
| <i>If focus is respiratory infection</i>                                                                                                                                                                                                                                                                                                                                                                                                                                                                                                                                                                                                     |                                                                                                                                                                                                                                                                                                                                                                       |
| What type of respiratory infection was the patient primarily hospitalized with?<br><input type="checkbox"/> Covid-19 pneumonia<br><input type="checkbox"/> CAP<br><input type="checkbox"/> COPD – exacerbation<br><input type="checkbox"/> Aspiration pneumonia<br><input type="checkbox"/> Other – please specify (by using a list of ICD-10 diagnosis): _____                                                                                                                                                                                                                                                                              |                                                                                                                                                                                                                                                                                                                                                                       |
| <i>If focus is urinary tract infection (UTI)</i>                                                                                                                                                                                                                                                                                                                                                                                                                                                                                                                                                                                             |                                                                                                                                                                                                                                                                                                                                                                       |
| What type of UTI was the patient primarily hospitalized with?<br><input type="checkbox"/> UTI without systemic effects (cystitis)<br><input type="checkbox"/> UTI with systemic effects (pyelonephritis/urosepsis)                                                                                                                                                                                                                                                                                                                                                                                                                           | If UTI with systemic effects, please specify<br><input type="checkbox"/> Pyelonephritis (local symptoms + fever + increased CRP)<br><input type="checkbox"/> Urosepsis (UTI + 2 qSOFA or relevant bacteremia)<br><input type="checkbox"/> Cannot be further specified<br><input type="checkbox"/> Other – please specify (by using a list of ICD-10 diagnosis): _____ |
| <i>If focus of infection is other than respiratory and urinary tract infection</i>                                                                                                                                                                                                                                                                                                                                                                                                                                                                                                                                                           |                                                                                                                                                                                                                                                                                                                                                                       |
| What type of infection was the patient primarily hospitalized with?<br><input type="checkbox"/> Unknown focus<br><input type="checkbox"/> Erysipelas<br><input type="checkbox"/> Tonsillitis<br><input type="checkbox"/> Gastroenteritis<br><input type="checkbox"/> Endocarditis<br><input type="checkbox"/> Meningitis<br><input type="checkbox"/> Other – please specify (by using a list of ICD-10 diagnosis): _____ <input type="checkbox"/> Soft tissue abscess<br><input type="checkbox"/> Cholecystitis<br><input type="checkbox"/> Diverticulitis<br><input type="checkbox"/> Pancreatitis<br><input type="checkbox"/> Appendicitis |                                                                                                                                                                                                                                                                                                                                                                       |

## Appendix VII - Algorithm for antibiotic treatment

The algorithm specifies if the antibiotic treatment is targeted or non-targeted. Targeted treatment is defined as narrow spectrum antibiotics directed against CAP, antibiotics directed against a detected respiratory pathogen or no antibiotics (e.g. in the absence of a bacterial pathogen and/or presence of a viral pathogen). Non-targeted treatment is defined as broad spectrum antibiotics not directed against a specific pathogen or antibiotics not directed against CAP.

Narrow spectrum antibiotics (NS) is defined in table 1. Targeted treatment (TT) for the different types of agents is defined in table 2. Treatment with other antibiotics (not listed as NS or TT in table 1 and 2) is classified non-targeted treatment (NT).

Table 1 Narrow spectrum antibiotics

| Antibiotic treatment – narrow spectrum      |                                                                                       |
|---------------------------------------------|---------------------------------------------------------------------------------------|
| No penicillin allergy                       | Reported penicillin allergy                                                           |
| Benzylpenicillin<br>Phenoxymethylpenicillin | Benzylpenicillin<br>Phenoxymethylpenicillin<br>Clindamycin<br>Macrolide<br>Cefuroxime |

Table 2 Targeted treatment

| Agents                                                   | Antibiotic treatment - targeted                                                                                                                                     |                                                                                                                                                                     |
|----------------------------------------------------------|---------------------------------------------------------------------------------------------------------------------------------------------------------------------|---------------------------------------------------------------------------------------------------------------------------------------------------------------------|
|                                                          | No penicillin allergy                                                                                                                                               | Reported penicillin allergy                                                                                                                                         |
| <i>Streptococcus pneumoniae, pyogenes, or agalactiae</i> | Benzylpenicillin<br>Phenoxymethylpenicillin                                                                                                                         | Benzylpenicillin<br>Phenoxymethylpenicillin<br>Clindamycin<br>Macrolide<br>Cefuroxime                                                                               |
| <i>H. influenzae</i>                                     | Benzylpenicillin<br>Ampicillin<br>Piv-ampicillin<br>Amoxicillin<br>Amoxicillin-clavulanate<br>Piperacillin/Tazobactam<br>Cefuroxime<br>Doxycycline<br>Ciprofloxacin | Benzylpenicillin<br>Ampicillin<br>Piv-ampicillin<br>Amoxicillin<br>Amoxicillin-clavulanate<br>Piperacillin/Tazobactam<br>Cefuroxime<br>Doxycycline<br>Ciprofloxacin |
| <i>Moraxella catarrhalis</i>                             | Amoxicillin-clavulanate<br>Piperacillin/Tazobactam<br>Cefuroxime or<br>Macrolide                                                                                    | Amoxicillin-clavulanate<br>Piperacillin/ Tazobactam<br>Cefuroxime<br>Macrolide                                                                                      |
| <i>Staphylococcus aureus</i>                             | Cloxacillin                                                                                                                                                         | Benzylpenicillin                                                                                                                                                    |

|                                                                |                                                                           |                                                                                                                              |
|----------------------------------------------------------------|---------------------------------------------------------------------------|------------------------------------------------------------------------------------------------------------------------------|
|                                                                | Dicloxacillin                                                             | Phenoxymethyl-penicillin<br>Macrolid<br>Cefuroxime<br>Cloxacillin<br>Dicloxacillin<br>Clindamycin<br>Macrolide<br>Cefuroxime |
| <i>Legionella pneumophila</i>                                  | Macrolide<br>Ciprofloxacin<br>Moxifloxacin<br>Doxycycline<br>Tetracycline | Macrolide<br>Ciprofloxacin<br>Moxifloxacin<br>Doxycycline<br>Tetracycline                                                    |
| <i>Mycoplasma pneumoniae</i> or<br><i>Chlamydia pneumoniae</i> | Macrolide<br>Moxifloxacin<br>Doxycycline<br>Tetracycline                  | Macrolide<br>Moxifloxacin<br>Doxycycline<br>Tetracycline                                                                     |
